# Supplementary material for: A dual-activity Topoisomerase Complex Regulates both Transcription and Translation
Source: Research Square preprint supplement (doi:10.21203/rs.3.rs-1054387/v1), 2021-11-23
Supplement: Supplementary file 2 [file adad0198ad5445d2851b6cb9.xlsx]

## Sheet: Table S1
Table S1. Differentially expressed genes in PRO-seq.
TOP3B-KO		TDRD3-KO		Y336F-KI
down (462)	up (1521)	down (818)	up (2605)	down (2259)	up (908)	Transcription down in three mutants (132)	Transcription up in three mutants (335)
ADNP	GOLGA5	LRRC8D	ATP5ME	PLEKHG6	C1orf109	PNMA1	ZNF576
STAC3	HLA-DPB1	PNMA1	RBM5	SYDE1	CCDC107	RPL23A	BIRC2
GPR75-ASB3	MLEC	TMEM109	PDCD2	XPC	SLC36A1	CCNB1	ARCN1
ZEB1	ZNF518B	PCNP	SPHK2	NPNT	PERP	KCTD7	TMEM44
SPATA13	AK8	TMSB15A	HS1BP3	DNAJC21	GALNT11	SMTN	GOLGA1
FANCD2OS	TRIM68	BAIAP2	ZNF576	TIMELESS	GRB7	MRPS22	SAMD12
PRIMPOL	GNB1	RPL23A	RAB6A	DYNC1LI2	HSPA8	ANXA5	TMEM115
MYH15	LAMC1	BSG	EFNA3	ZNF516	KLHDC4	CBR4	CCDC92
MYO15B	SSH1	CCNB1	RPUSD4	ZNF224	OR51B5	IFI35	CANT1
CORO1C	MRGBP	RPL17-C18orf32	SLC7A5	USP39	NAPA	EXOC6B	SNX4
KIF4A	SCLY	ZMYM2	ZNF282	COA4	MIEF2	ING4	FBXO9
SRRM5	KANSL1	ABHD8	SMC3	MOB3B	EPHA2	PTTG1	FBXO6
CDRT4	SLC25A19	COX5B	PUF60	CAD	MYADM	MSX2	TRAK2
RC3H1	DTD1	ZNF608	RRNAD1	TMCC1	MRPL47	DDX5	EXOC3
R3HDM2	STK39	MRPL45	DZIP1L	KLHDC2	NDUFB5	TMEM126A	DPH7
FAM177A1	PKD1L2	BYSL	UBXN2A	BCKDHB	ITPKC	COIL	TGDS
IL1R1	TELO2	SELENOF	SREBF2	AP4S1	PHLDA2	RTL8C	IGHMBP2
C1orf210	TLK2	CHMP4A	RAN	LSR	TMBIM1	CENPF	MRPL21
LCMT2	SMAD2	PHIP	TMEM19	PHIP	BCL9L	EIF4E	MGAT5
ADAL	CCDC130	SETSIP	BRD3	NUDCD2	IFT43	KIAA0513	POFUT2
CLSTN3	GTF3C3	PCF11	COPS9	NPRL3	TAOK2	UBAP2	ZNF316
FUZ	METTL22	COQ3	TSNARE1	RTN4RL2	RTBDN	DOCK9	CHPF2
ARMC8	WBP1	MEF2B	NAXE	BORCS5	ARID3A	RSF1	AHDC1
TLX3	MRPL2	RPS27A	ATXN1L	SDCBP	RETREG3	GLS	PTPRU
KBTBD8	NOL7	ETV4	NEIL2	FDXACB1	TADA2B	FAM174A	NCOA1
CPA4	PARP9	CEP95	NFATC2	PTEN	SFT2D1	PFDN5	PHF20L1
MAGI3	DTX3L	PSMD10	BRPF3	HNRNPH3	DENND1B	DDX27	TMED8
ABCC2	PHF1	MED20	SLC35F5	PBLD	FKBP14	CCDC113	ANKS3
GLS	CABLES2	RPL9	CCDC96	PHF3	AZIN2	CNOT10	C1orf198
AFAP1L1	SLC9B2	SLC25A14	MYH9	ZNF789	PRDM16	INO80B	TM7SF3
SYCE2	SHPRH	LPCAT3	RBM15B	TTBK2	RPUSD3	KIF15	ITGA7
TMEM126A	APBB1	FANK1	HNRNPA0	PEX11G	BRWD3	KIAA1143	TTC21A
ZNF585B	SLC45A1	ANKMY2	ESPN	EFCAB11	FCRLB	AAMDC	CDC42BPG
NOMO2	BBS2	CDC6	FIS1	ENOPH1	CXXC5	ATF4	GORASP1
ACOT9	ATXN7L3	GOLGB1	LTV1	ATG10	CAST	FAM72A	ACAP3
SLC25A44	STX1A	ARNTL	TRAF4	FAM149B1	WASHC3	MFGE8	MYO1C
PRPS1	TMEM64	IL10RB	YIPF6	STX16	ZNF354B	MAGEA2	POMT1
WLS	SYP	RPL38	MFSD12	NEMP2	RFT1	WLS	BTBD11
NOLC1	SCO2	GTPBP1	TNIP2	RPL18	FAM83F	WASHC1	ZNF500
ZNF490	CMIP	TMEM98	MON2	MTMR14	ANKEF1	SERTAD3	CDK6
ANKRD42	PKN1	BAZ1A	AP1S2	SLC25A40	MSANTD2	RRN3	TMEM127
KIF23	CYFIP2	ZNF277	UPF1	NUFIP2	ITGA7	TXNRD1	AGPS
POMZP3	CMAS	LIAS	KIF13A	MAPK14	BMP8A	LGALS8	TBCB
YWHAZ	PNPLA2	HELLS	RABL2A	IFT46	DHX37	PRPSAP2	CIAO1
RNF103-CHMP3	GHDC	SMAD1	ANKRD44	BABAM1	GOLGA5	TNFSF9	GSK3A
PRPSAP2	CCDC115	FLNC	TUBG2	TEX9	TM9SF2	HEXIM2	HAUS2
ZNF675	TMEM44	ING3	CEP85	LSM3	ZDHHC1	OPHN1	LRRC57
C6orf62	ZNF697	ZNF738	AP1B1	C2orf69	LAMB3	HYPK	LDLRAP1
IGSF9B	ANO6	ZNF559-ZNF177	UBC	ZNF652	IFITM3	C14orf132	PGS1
TMEM40	SNX1	ZBTB6	PA2G4	SMARCE1	ATP5F1C	ABCC2	IFT20
NRP1	MKRN2	EIF4A1	ENOX1	RAD52	PIP5KL1	INTU	B4GALT4
C1orf216	PTK2	EPB41	CYREN	TSPAN5	SAP130	RPS6KC1	ZNF174
GJA3	ADI1	KRT80	FKBP8	IRF5	SLC12A8	NASP	ZSCAN32
BUB1B-PAK6	KCTD2	IP6K2	SIK3	METTL2B	STX12	DBF4B	TMEM199
MRPS22	NAPEPLD	ZNF559	TOLLIP	PSMD12	DENND2D	OARD1	POLDIP2
ZRANB1	IP6K1	KCTD7	JAK1	TMEM143	PINK1	C8orf44-SGK3	CYP2R1
ABHD8	CHERP	ACAD11	ZNF862	SEC62	FAM214B	VCPIP1	EMC3
STK17B	EFL1	KIF11	ZNF792	PDLIM7	RETREG2	CBWD2	CXXC1
LNX1	RNF130	SDHC	C19orf33	COX18	COMT	EGR1	LAMC1
DDX27	NHLRC3	NTN4	HNRNPLL	GNG7	GDAP2	PAIP2	ANKEF1
HEXB	PROM1	QPCTL	CCDC91	ZC3H10	SEMA3A	MAGEA2B	MOCS1
PTGER4	UBE3D	KCNF1	RTF1	HBS1L	RSU1	NR2F1	HCFC2
OS9	BOD1	PSMC6	DESI2	GGA2	SLC12A6	RNF144B	TMEM59L
ENC1	PIGQ	MARCKSL1	FNBP1	ARRDC3	TM7SF3	TUFT1	ABHD15
GEMIN8	PKIG	KDM1A	LMNB2	LAP3	GLMP	ARHGAP26	GOLGA5
ECH1	KIF16B	MED17	TAB3	USF1	C17orf58	NR2F2	ZDHHC8
AIFM1	NBDY	TMEM144	BAD	FMC1	ZNF641	GDAP1	STAT3
METTL16	PSMG4	ANAPC7	PLEKHG1	INTU	AQP3	ICAM1	AKAP11
CLMP	TBL2	ABHD17A	PRDM16	KLLN	FKBP1A	NR4A1	KAT6A
HBEGF	BAG4	ZC3H15	LAMB2	MTFP1	STX1A	ZHX2	SELENOO
PLAT	SCFD1	CWF19L1	USP12	EXOSC6	UBE3D	ZNF222	CASKIN2
GCH1	UXS1	PRR5	FSIP1	PAAF1	CAPG	SRMS	GLRX3
NAB1	ZBTB40	TMEM101	MRPL38	DBF4	TANC1	HSD3B7	DHCR7
RETSAT	STN1	KBTBD7	P4HTM	CLNS1A	MED28	ZNF493	ENDOV
CBR4	P2RX4	LSM8	SLC17A5	VEZT	CDK6	CEP44	LSM14B
ELMOD3	MCM3AP	MYL6	BIRC2	SMDT1	WDR3	ACTR6	SUDS3
ABHD3	RNF10	RCC1L	AGPAT2	ZNF791	CEP83	MOB3B	LGALSL
AAMDC	NAT9	ADAT1	KLHDC4	SAV1	TAF3	OSR1	OSBPL7
ARHGAP26	NOD1	PDCD7	ZBTB7B	TMEM126A	SCAPER	SLC2A12	TARBP2
DDX52	SMARCA4	PTER	SFT2D2	WBP1	TBP	PRRT1	BCL3
OXSR1	CHMP4B	BZW2	CCPG1	HSPA4L	LRRC47	ANAPC10	CYB5R4
ZBTB6	SMN1	ANP32E	NDUFB9	FBXO27	EML4	PRDM1	PRKAG2
ITM2C	BBOF1	BIK	GPATCH11	SMG1	CYB5R2	TIMP3	ZNF445
TUBGCP5	KIAA0100	SIAE	ZNF425	EHHADH	FAM120AOS	PARM1	TEX261
SPOCD1	DEAF1	CITED1	MSI1	CBX1	EDEM2	PRIM2	WIPI1
MRPL34	WASHC2C	KCNMB4	ZNF699	SP4	COMMD3	CENPW	SLCO3A1
SPTSSB	MTUS1	PDLIM1	USP24	APRT	COMMD3-BMI1	GOLPH3L	DBNL
SLC2A11	SPPL2A	BBS12	TATDN1	NUDT16	KLHL35	ARL14EPL	PSMD13
RBMS1	CDC45	KIF20A	AUNIP	APOD	NTMT1	PCDHGB2	PCSK7
CPEB4	EBF2	TBL1XR1	PHLDB3	CCDC88A	DCTN1	ABLIM1	LMCD1
COMMD4	MAP1S	PISD	USP37	KCNN4	DHX32	PTP4A1	SH2B1
RSF1	ALDH3A2	CHCHD5	KRT7	CD2AP	NSMCE3	ZNF350	NIPSNAP3A
HNRNPA3	CHRNB1	BRD8	GPR137	SUPT20H	BLCAP	SLC2A11	SIRT3
COIL	NCOA1	HTR7	PCYOX1L	PKD1	SAT2	FOCAD	POLR2C
RTL8C	SARDH	SPA17	SYNJ2	ZNF776	IL4R	ZNF772	MRPS6
FGF9	TMEM170A	ATP12A	BCL2L1	NME4	INPP5E	AKR1C3	SLC5A3
EXOC6B	ARHGAP21	SYPL2	TBP	SLC25A30	MAEA	KLF4	RELA
RPL23A	IGF2R	ZCCHC17	NAA25	STK11	ZNF75D	CBWD1	RNF214
HMOX1	LRRC8A	DNTTIP2	CLIP1	ECD	C1R	PHGDH	C11orf95
CILP2	RNF167	LCA5	MRPL12	REV3L	CALM1	ZNF595	BRF2
OPHN1	ZNF365	MRPL46	RPS19	MGAT2	TRMT1	PCDHGA5	SPATA33
SMTN	BMP8A	ATF5	UBXN7	INTS4	MAP4	LNX1	DMPK
CLUAP1	COQ2	XPOT	PIGQ	CRLS1	GNB5	TMEM200A	STX1A
FAM174A	VPS4A	CCNB3	VPS16	KCNG1	MAPK8IP1	ACSL5	GOLGA3
LTA4H	DPYSL3	SNRNP40	GRK6	GPR173	TCP11L2	PLAT	ATP6V0D1
KCTD7	SEC22A	TWNK	ARCN1	DCPS	C6orf62	PCDHGB6	TMCO3
ATP6V1C2	ZNF343	MRPL43	GOSR2	RPL36AL	AKR1B1	ZNF773	TBC1D10A
DPYSL2	XPA	KIF20B	FAM118B	PRR12	KLK8	CASP10	GALNS
ING4	GMPPA	SMTN	KIF3B	CS	CRABP2	CBWD3	MAN1C1
INO80B	BICD2	TSR2	DYRK1A	RNASEH2B	SNX4	ZNF804A	SLC27A4
HSD3B7	C16orf91	EML2	S100A14	TGIF2	TTC30A	VCAN	CKAP4
PDLIM1	RBFOX2	ZNF215	FUT4	DDX27	TXNDC9	FGF2	SDHAF1
USP6	SQSTM1	TIMP2	ZBTB17	ZFAND6	MGAT5	PREPL	DCUN1D2
PPARG	DIDO1	RNF181	TMEM44	CHAMP1	HEXA	FN1	THBS1
PHF11	AAR2	N4BP1	EBF2	TPP1	ZNF500	CALD1	CLIP2
KIF15	TMEM104	FTL	GOLGA1	PODXL	SLC22A18	SGPP2	ZDHHC1
HYPK	SETD1A	FLAD1	HR	C16orf87	ZBTB47	CBWD6	ACSF3
EMC10	UTP4	LAMA3	ANKRD54	WEE1	IRF2BP1	CD33	PRSS22
FAM71E1	MSI1	MRPS22	BCAP29	WWTR1	KLC4	ZNF550	PFKFB3
SERPINI1	PTP4A3	CPA4	GSPT1	MGST2	TMTC3	SLC20A2	NAA10
KIAA1143	OST4	PTPRM	ABHD14A	E2F7	PHF20L1	TRIM39-RPP21	WNT7B
ZNF850	PTBP2	MRPS11	ABHD14A-ACY1	SETMAR	DPH7	GCNT3	MROH6
GNB5	KIAA1671	HERPUD1	ACO1	NUMA1	GOLGA3	SGK1	HEMK1
BMP6	MIF	PRKRIP1	RGL3	ASB3	PDIA5	MMEL1	FAM160B1
OARD1	CCDC71	DNAJB11	SAMD12	ERLEC1	TBCB	NEDD4	GPSM1
ZNF480	B4GALT6	TANGO6	EGLN1	DNAL4	ACSL1	ANXA10	PRRX2
C14orf132	PGS1	RPL35A	MCIDAS	EGLN3	TM2D3	NFRKB	ADGRF1
RAPH1	ZNF599	ANXA5	AIDA	U2AF2	C2orf49	RPSAP58	ZNF778
ZNF600	MTHFSD	IQCG	MKI67	EIF4H	SYNGR3	EFCC1	NT5DC2
PRR15	SRCIN1	MRPS18A	MINDY4	EPOP	LAMC1	SMIM14	KMT2B
PABPC3	DENND1A	CBR4	LRPPRC	GGA1	BRD3OS	MFSD4A	CST3
DLGAP5	WDR35	ADNP	NKX1-2	ATP8B3	CSPG5	PHLDB2	AFDN
MFGE8	ARHGAP12	SOWAHB	THRB	GNB2	COG3		UCKL1
ATF4	TRAPPC12	TAF9B	OPLAH	HNRNPUL2	DOCK3		PACS1
RRN3	SPACA9	ZMAT2	PSMD6	ZNF385A	HIKESHI		BMP8A
ABTB2	METTL9	PARS2	PLEKHA5	STX5	AP2M1		TESK1
RNF144B	FBXO31	ERP29	CREBBP	LONRF3	CPD		RTN4RL1
SAMD9	ANO10	VAMP4	CAPRIN2	CDK2AP1	KIFAP3		NENF
CCDC88A	PYGO2	SNAI1	KIAA0100	ICE2	NBDY		FBXO31
SRGAP2	C8orf33	LYSMD4	ECHS1	GTPBP10	RASA3		PTPN18
CNOT10	ANKEF1	FBXO21	TMEM128	LSM10	CHORDC1		TRAPPC2L
STAT4	SCNN1A	NUP35	TMEM17	ZSWIM1	BRF1		EFCAB14
SUV39H1	MANF	SF3B3	CNTRL	PUM3	TMEM44		TFEB
CNTNAP3	ETAA1	SYMPK	SOD2	OSBPL9	POLR2C		AP2M1
PARM1	ARHGAP8	COG4	RMND5B	XIAP	ERCC6		NDUFS7
SPAG1	BTBD9	TMEM79	HSP90B1	BTC	EXD3		RFNG
CYTH4	SHISA4	WDR6	HEATR5B	GTPBP1	ARCN1		MROH1
DGKZ	PEX11A	F5	STAT1	KIF22	PEG10		MAN2B2
UTP14C	ZNF436	SELL	WDR55	RNF24	MACC1		LTBR
PFDN5	RTKN	NDUFA2	VDAC2	SAFB2	YKT6		TJP3
TUBB2B	MTFMT	PPP1R15A	ERGIC1	STARD8	SHROOM2		KLK6
FAM72D	AGO2	DDX52	UBE3A	MAP2K2	DDX58		ANO9
ZNF813	B4GALNT3	DNAJC22	TMEM115	DCAF15	NDUFA8		TINAGL1
CCNB1	TSNARE1	BTN3A2	NPHP4	MTMR11	TGDS		MRPL36
SRGAP2C	NTPCR	SAMD13	SF3B2	SLC2A11	CCDC186		BCR
LAMP3	SRP68	ORC2	GALNT4	EPHX1	IRF9		TPST2
PCDHGB1	ZFP37	SPC25	LPGAT1	DEPDC1B	FBXO6		PSEN2
TLL2	SLC25A11	CYCS	TBC1D22A	COPS7B	MB21D2		PIP5K1C
GPR15	CCDC88C	CPE	PGRMC2	SAP18	UNKL		GPS1
COPZ1	PTOV1	ID2	SETDB2	ZNF532	PPP1R14C		CLMN
FERMT2	KYAT1	NUDT5	SETDB2-PHF11	IGF2BP2	DAPK3		DFFB
MAGI1	NAGK	SRSF8	THNSL1	RNF220	NAA10		SLC22A18AS
HEXIM2	RNF187	MTO1	FNDC3A	BBX	PLEKHM2		SLC46A1
ADAM19	NENF	WDPCP	TNFAIP8L1	CCZ1	B4GALT4		CEP104
EIF4G2	ATP5F1A	IK	SMIM13	LRRC8B	PDGFC		SYNGR3
SMIM14	MAP2K7	IFI35	DTNB	TRMT10C	OAT		SLC22A18
BUB1	IMPDH2	CBLB	CUTA	SAFB	SGCE		IL17RD
RPS6KC1	PGP	ATXN7L1	CCDC92	MSL1	TINAGL1		DUSP22
ZNF136	TCP1	SORT1	CANT1	ZMYND10	MED9		SAT2
APOBEC3D	PRDM5	HMGB3	ZNF263	RASSF1	AMOTL2		NATD1
ZNF266	NF2	ZNF134	MTCH2	C2orf42	ATMIN		HECTD3
INTU	TOLLIP	BRIP1	TTC13	GREB1L	GALE		SLC25A4
DDX5	TRAK2	MIPOL1	TBRG1	SLC22A17	PUSL1		PLPP2
TUFT1	FKBP5	FAM83D	ARHGAP1	ADM	PCDH7		CPNE7
BAZ2B	SBF1	EXOC6B	STXBP5	SMIM15	WDR7		APOBEC3F
GDAP1	TAB2	TMEM116	RBKS	PDE6D	PDPK1		LMF2
CCDC113	ECHDC2	MAX	KRCC1	REST	ACBD3		RNF166
EGR1	LARS2	CCDC14	ZNF823	HELQ	RPS6KB1		CTU2
CBWD1	ADRA2C	HOXC9	RPP25L	CACUL1	TUBD1		PTPRH
TLN2	CIB1	CDC123	HTATIP2	TESK2	TMEM70		GLT8D1
NASP	GMEB1	SENP2	SARDH	HERC4	QTRT1		CRABP2
S100A10	CMPK1	ATP5MF	SNX4	ATP1A1	COMMD1		PSME1
PRSS3	TRAPPC10	ATP5MF-PTCD1	NAV2	CENPM	QTRT2		TSEN54
EIF4E	ARHGEF3	WDR83OS	TATDN2	ZDHHC21	HSD17B1		SPNS2
ZUP1	EIF4G3	NFIA	HIPK3	C11orf1	ZNF174		NTMT1
ANXA5	RAB5C	SNRPD2	PIGS	C17orf97	OCRL		NUDT14
GAPDHS	MED1	INTS2	SEL1L3	PRDX3	MTRNR2L8		GATA2
MOB3B	TMEM115	GDPD3	GFOD2	USP9X	HEATR6		YKT6
CENPF	ZBTB39	ING4	BLVRB	ODF2	FUT8		CAMSAP1
PSPC1	PTPN2	CRISPLD2	TSSC4	HID1	CPNE9		URI1
JMJD1C	MRPL12	PTTG1	PPP1R9A	CCDC85B	C1orf50		C11orf45
PTTG1	METTL25	FBXW9	JAGN1	TPRKB	ZSCAN32		TDRD7
PDLIM3	CAMSAP3	ZSCAN2	NDUFV2	ZNF689	SLX4		ARFGAP3
TNFSF9	FAM168B	TUBB6	CHD9	PTPRF	MRPL2		ARFGAP1
UACA	CIZ1	SLC25A16	MAP1S	CCDC91	C8orf58		ZGPAT
CEP44	PARD3	CPT1C	LIFR	LEO1	TSPO		INPP5E
CUL1	FZD5	MSX2	FBXO9	PIGV	RRP8		A4GALT
GJB2	PRPF8	DDX5	THAP11	OXSM	ZNF449		SLC38A7
CPVL	IRAK1	TMEM126A	EEF2K	FAIM	GVQW3		MICALCL
ZNF804A	TMEM87B	TTC19	SH3RF1	HOOK1	VGLL4		TSC2
DBF4B	ZSCAN32	MORF4L2	SYPL1	PDF	FURIN		ZBTB42
UBAP2	RBM33	ZSWIM7	ADARB1	CFAP43	NDUFAF3		GRTP1
SNTB1	CDK6	LRRC20	CD83	ITPRIPL2	TCTN2		UNC13D
CWC22	ATXN10	PROS1	CSNK2A2	CDIPT	DCUN1D2		CCDC93
ZHX2	MAP4K5	NUP133	DHX33	PGGT1B	RPL17-C18orf32		FBXL16
ACTA1	PXMP2	PRPF19	PCGF3	WASF2	SH3RF2		DGKD
ZNF845	BMP2K	NUF2	ADAMTS17	SPATA20	PAQR4		PDIA5
OSBPL1A	RNF216	MDN1	ZZEF1	HADHB	CCDC191		MYORG
SRGAP2B	LRRC47	COIL	MAT2A	ARHGAP26	AGPS		MYLK
PADI2	SLBP	IKZF4	PRF1	HADHA	IL6R		NTHL1
TMEM200A	MGAT5	PLPPR4	PARP2	ADAM10	P3H1		ABCB10
ZNF573	TSPAN17	HACL1	ZNF57	CEP250	B4GALT1		STX4
ARL4A	BRWD3	TAF11	FBXO6	ZNF594	TPST2		SSH3
SLC2A12	RHOF	ELMOD3	HUWE1	APBB2	SH3BGR		JOSD2
SRMS	JUND	COX11	NUP98	ZNF589	SESN1		RTBDN
PAIP2	ITGB4	BTD	TIMM21	WDR48	MIGA1		CPSF1
ZNF585A	APEH	TTC32	TRIM62	MMAA	SPCS2		PPP2R5C
TIMP3	EMSY	C16orf46	TRAK2	ZNF761	APOBEC3F		TMEM184A
HAS3	EIF4ENIF1	UFSP2	EXOC3	ORC4	PACS1		PACS2
ACTR6	CCAR1	LIN37	L3HYPDH	SIKE1	STAM2		REXO4
DBT	EIF2AK4	BICD1	ISG20L2	LRTOMT	CLMN		SLC30A4
MAGEA2	CCDC59	RETSAT	DPH7	CAPN2	APBA3		TRIM32
NOMO3	FBXO27	CDK20	CDA	ESCO2	GPR108		METTL26
AGPAT4	PLAGL2	SH3BP5L	PCGF5	MBD5	ZNF613		EXD3
NIPA2	ATP11A	NECTIN3	DTD1	TBX3	FAM161A		FHL1
SET	INTS4	TRPV3	ATF1	MRPS18C	ZNF576		MDK
FAM72C	IPMK	CALCOCO1	SAAL1	MTRF1L	ZNF365		PRKCD
PDLIM5	ATAD3B	CA13	NOL9	MPP6	LATS2		TTLL3
ARHGAP40	TINAGL1	GINS4	ITGB5	NT5E	ATP6V0D1		MYL9
PNMA1	SGCB	AP2B1	C17orf80	SENP6	ATG101		MTRNR2L2
ATP12A	CDR2	GREB1L	CYP20A1	SAMD4B	PPIL2		TMEM181
MSX2	UHRF1BP1L	RTL8C	SLC48A1	TMEM43	TMEM181		FRMD8
CALD1	TAP1	MRAS	MOB1A	FDXR	ZNF283		TOX2
EFCC1	PPIL2	UBE2L6	EPB41L4B	PSMD7	RHOT1		RHOC
NR2F1	TMEM39A	EIF4G2	PRDM10	TMEM218	CD68		SLC12A8
ANAPC10	SLC39A10	DNAJC15	ZNF664	MICU1	XRRA1		HABP4
PGAM4	ERCC6	CENPF	ELL2	NFU1	ILK		KSR1
CENPW	PLCD1	SNW1	SOCS6	RWDD2B	NHSL1		SCYL1
GOLPH3L	POFUT1	EMC4	MPZL1	PGK1	DNAJC17		BMP7
SLC12A6	MT2A	PTGES	MMAB	MRPS15	PWWP2B		RELB
LONRF3	PROSER1	PRSS3	ZCCHC14	DGUOK	ZFYVE19		AXIN2
SPIB	HRAS	PDLIM5	FADS3	SRSF4	ZSCAN22		PNPLA6
DSC3	CCDC57	RIPK2	SNUPN	SNU13	VPS11		KIF1C
ALDH1L2	MTMR1	SLC16A7	MAPK1	WNK1	HMGN4		ADAMTSL5
VASH2	TCAIM	RNASEH2C	RANBP9	CAPRIN1	CDK5		KLHL35
AMMECR1L	SLC35F6	EIF4E	JAK2	STT3A	TTC8		INSIG1
ZNF566	RAB22A	SYAP1	RNASEH2B	BEGAIN	ZSCAN20		MINK1
PTP4A1	ZNF174	ZNF92	WASHC2C	SNX12	LAMB2		ZNF275
ZP3	PM20D2	LRRC6	DENND6A	CDK13	TMCO3		EPS8L2
SHC1	APBA3	ARMCX5-GPRASP2	TXNDC11	ZNF280D	KIF21A		SNX7
NT5C2	ZNF598	ARMCX5	TGDS	CHTF8	MRPL36		SHROOM2
CBWD2	CXXC1	CHN1	TMEM214	PITX3	MINK1		CD151
ATXN1	FGFR2	C1orf216	CYB5D2	FAM133B	VPS13C		WNK2
IFI35	TXNRD3	NUDT21	MERTK	MIF	IRGQ		C8orf58
WASHC1	UBE2E3	PNISR	KCTD11	ART5	MRPL55		SOX8
ZNF772	CTBP1	PRKD3	WAC	NEMP1	SYDE2		TMEM151A
KIAA0513	MOB1A	HEXIM1	RDH11	ATP2A2	PRADC1		ALS2CL
ZNF814	PLEKHA4	TARS2	ECSIT	NGFR	NLRP1		JCAD
FER	GALNT4	MAP7	RBAK	ZNF12	SRPX2		RASA3
FOCAD	IPO4	SUMO4	RBAK-RBAKDN	ERCC6L	KLHL17		PWWP2B
RPSAP58	AP3M2	KIAA0513	FUBP3	ZRANB3	ARL6		KIFAP3
TMBIM1	RECK	WRAP53	LRP5L	ANKRD13C	OSTM1		ETS2
TLR6	ARF1	IFI6	NQO2	SLC2A1	PPP1R3B		EPB41L4A
C8orf44-SGK3	GNB1L	STAM	TNFAIP1	HNRNPA1L2	ECHDC2		MAP3K12
FGF2	RTL10	FAM13A	TBC1D24	WASHC1	NENF		GPAT2
SULT1C2	GTDC1	HARBI1	LYRM1	DENND6A	ZNF473		VEZF1
VCPIP1	DHX40	MDH1	ZMYND8	HMGN1	FOXO3		WWC3
IGF2BP3	SLC22A18	PSD4	MSRB2	COG4	SLC25A25		SSTR5
ZNF222	BOP1	UBAP2	CUX1	PDXP	CLIP2		SUSD2
MAP4	PXN	APTX	DSC2	SEC23A	SAMHD1		NBL1
NR4A1	EPB41L4B	DOCK9	SPPL3	AGPAT5	MGAT1		SULT1A1
VCAN	MAST2	C4orf3	CHST12	CENPV	ZNF275		RIMKLA
ZNF234	IFNGR1	FAM177A1	ARL5A	GXYLT1	SARM1		FBXO2
PRDM1	YY1	PRKD2	SRP19	ANP32A	CYP2R1		RPS6KL1
SESN3	PPP5D1	TTK	BEX3	HHLA3	LRP11		PITPNM1
FAM72B	PXYLP1	TP53	MBD1	CTXN1	TWSG1		FBXO44
ZNF525	TEAD3	FHDC1	MVK	MXD1	VIRMA		FES
MAGEA2B	RELA	DACT1	RAVER1	ABTB1	PPP2R5C		PPP2R1A
ZNF134	ERICH1	DAPK1	AHNAK	KIF5B	GPSM1		SEMA3B
ARL14EPL	VMA21	POLR2J3	SAP130	CELSR3	STX3		IGFBP6
SERTAD3	GOLPH3	RSF1	PELI2	KPNA6	SLC35D1		CTDSPL
NDST1	FSBP	ATP6V1C1	TCF7L1	CSRP2	BRF2		SATB1
ZNF701	CMTR1	SEPHS2	BOLA1	ATXN7L1	ABRAXAS2		ARHGEF1
AKR1C3	SNED1	ACADSB	TCAIM	FBXO34	NOC4L		TSPAN18
OSR1	ZNF664	RHOB	DMXL2	SSB	BACE1		TSPAN4
SKAP2	ANKRD24	PIN4	WRAP73	PLEKHM3	STRADB		GNPTG
ZNF773	FBXO6	USF1	ZNF408	EIF2B1	SNX1		MVP
TXNRD1	GPR108	TIMM44	NOC4L	DHODH	GBF1		FGF18
PRRT1	FAM189B	TMEM40	PARP4	TMEM69	ZGPAT		SULT1A2
ZNF83	COA7	DLL4	CDV3	HNRNPDL	LHFPL2		MAP1LC3B2
NR2F2	GAREM1	CDKAL1	WDR91	VPS51	FBXO9		KIFC2
APC2	ST6GALNAC4	CBWD5	AP1M1	FANCG	BIRC2		TSR3
RYR1	NEDD1	BUB1B-PAK6	PCED1A	HSF2	CKAP4		KCNH2
ICAM1	TM7SF3	CCDC28B	EVA1C	VCP	DNAJC5		PGGHG
CTBP2	TARBP2	LAP3	IGHMBP2	ULK1	CST3		RAB26
SYTL3	ADO	SDCBP2	CDC42BPB	CHCHD4	WBP1L		SAMD11
KLF4	YTHDF1	METTL16	JKAMP	PFN1	GSK3A		ALOX5
MILR1	KCNN4	PRR15	GADD45GIP1	GTF2H3	DDX51		PTK6
MYLK4	TMEM127	ZSWIM6	MTFR1L	GNPDA1	LRSAM1		VGF
SMAD7	NPRL2	NEIL1	GTF2A1	TMEM18	RAB5C		TBXA2R
SEMA3A	HTRA2	ST6GAL1	MRPL21	FAM160A1	C11orf95		INPP4B
CNTNAP3B	USP18	PIH1D1	CPPED1	TSPAN3	AP1M2		MAML2
TRIM39-RPP21	ENO4	ANXA7	LEMD2	CHN1	PIN1		TSC22D1
SERPINA1	SLAIN2	IGSF9B	PPP3R1	TIMM10	WWC3		SCUBE1
F12	EZH1	C1orf112	SOWAHC	RANBP2	TMEM199		PDGFA
ANXA10	ATP8B3	LAMC2	INPP4A	OAZ2	SYNJ2BP		APOBEC3H
NFRKB	HSPA12A	METTL18	LGALS3	SLC38A9	SYNJ2BP-COX16		MGLL
CSF2RA	LSG1	TLL2	NDUFA10	PRDM11	SLC25A4		ELMO2
FAM72A	MIOS	RNF122	PDF	NAA60	NXPE3		LRRC3
CDIP1	PTDSS2	CENPK	AMFR	CNNM4	TECPR2		TTC9
TRPM6	MOSMO	SLC25A21	NXT1	C1orf74	MID2		PIK3CD
GCNT3	PDHA1	SAP18	ADI1	STPG1	TRIM14		NOL4L
PHGDH	RPS21	PQBP1	FAM13B	RNASEH2C	TBC1D1		PDGFB
ZNF91	BCKDK	FOXD3	CLCN6	RFC3	TKT		RHBDF1
GLIPR1	NDUFC2	NARS2	PPP5C	SF3B3	VPS41		NOTUM
NHSL1	NDUFC2-KCTD14	PPWD1	PGAP2	ARHGEF2	TRAK2		PPARA
PRIM2	MED25	ZCCHC8	PARP1	ZNF783	OXCT1		STEAP3
SPIN2A	APOBEC3F	VWA5A	TTPAL	SPHK2	EMC3		KLK10
ZNF595	ZNF692	C6orf226	ZNF706	TCOF1	MROH6		KRT15
NEDD4	ZFYVE28	OSBPL9	SNX33	JAG1	TBC1D10A		S100A5
HSPA2	FJX1	TIMM17B	ZFAND3	DUSP18	POLDIP2		KLK5
ACSL5	PRKAG2	HEXA	TBC1D2B	FAM13B	RIOK3		RXRA
RNF43	MAP2	ARHGAP29	MGAT5	PROSER2	IPO13		CUEDC1
HOXB4	TASP1	SLC6A8	HOOK3	PRDM1	PRKAG2		ITGBL1
CASP10	SLCO4A1	DISC1	POFUT2	GALM	ALG14		PACSIN2
FUT8	MPPE1	SRP72	DDX51	ISOC2	FGFR2		JAZF1
AASS	CYB561D2	NXF1	TRAPPC12	CDC42	RGS9		LIF
SGPP2	SCAP	ZNF490	CA11	ADORA2B	SNX2		TCEA3
PREPL	AGRN	DRAXIN	KLHL17	MCCC2	DYRK4		LGALS9
FAM47E-STBD1	SWAP70	GLS	NAPB	STK17B	ATP5MGL		HS6ST2
ZNF426	OAF	FAM174A	PTPN1	MRPL49	TEX261		SLC29A4
ZNF493	TOMM70	AGPAT4	MARK2	TMEM187	FHIT		ELOF1
LMO7	SELENOO	AASDH	LRRC8E	CPT2	C8orf76		RIMBP3C
LGALS8	C19orf25	ZKSCAN8	GPR158	S100A3	PPM1K		CYP26B1
ZNF350	LDB1	CEP97	CIZ1	QRICH1	RAB3IP		SLC15A1
MNS1	AUP1	PFDN5	TCF7L2	KIFC1	MRPS6
CBWD3	RNF213	COX16	MOSMO	TMEM109	SLC5A3
WNT16	CPNE7	LEO1	ZNF316	TOR1AIP2	TGFA
COL17A1	LRRC56	GCDH	NDUFAF3	TNFRSF12A	TMC7
COX6B2	CHP1	TFPT	B3GALNT2	HNRNPF	HERC6
CD33	DUT	TSPYL1	SMIM29	TXNDC11	HEMK1
MAPRE3	DPF2	OGT	CIAPIN1	STAT6	ANKRD44
FN1	COG6	MAP4	RAB3B	NDEL1	PRKCH
STK24	RILPL1	TSPYL2	RNF170	ATN1	EXOC3
MICAL1	IFT20	FBXO32	TMEM208	ZSCAN2	SLC38A7
PARVB	UQCRB	NOMO1	CPNE3	TIMP1	RRAGC
SYS1	RASGRP2	ZSCAN30	NDUFA4	DGCR8	TMEM38A
HOXB8	RPS6KA1	AREG	PLK3	GDPD3	CPNE7
TACSTD2	KLHL21	ZNF791	UBL5	REEP5	MED27
KRT7	CALM3	CCDC163	CLCN7	GPRC5C	ARAP1
SLC20A2	BCL7B	DDX27	TRAM1	NKTR	ACSF3
TIAM1	IFIT3	PBXIP1	ZNF354B	CFL1	TRAF6
ANGPT2	LMBR1	CCDC113	STRADB	XRCC1	APOL6
HNF4A	SPPL3	ZNF597	MSLN	GABARAPL1	ITGB1
L1CAM	CCDC92	MMACHC	RAB3IP	PCCB	KLHL18
MMEL1	SLC39A13	DAB2	C2CD2L	BIN3	CD151
PCDHGB2	ZNF865	CNOT10	MIIP	ALG10	REXO4
PHLDB2	ZBTB12	C4orf46	PARD6B	RBM26	LRCH3
ADGRE2	FLT3LG	INO80B	ZNF138	MIS18BP1	FAM160B1
RNF19A	MGMT	KIF15	CHD1	HJURP	OSBPL10
SGK1	SORBS1	AKAP12	COQ9	CYBRD1	STX7
BICDL2	SFXN1	KIAA1143	ABCD4	ACBD5	NEU1
ATF7IP	CEBPA	GPN1	OXR1	MSL2	STX18
PCDH7	CYP2R1	PTCD3	ARFGEF3	PDS5B	INSIG1
CBWD6	INTS5	AMIGO3	SRPX2	POLR3K	PGS1
BAIAP3	COPG2	C22orf34	ZNF3	ANAPC1	SLC46A1
ZNF69	SH3BGRL3	SLC1A3	SCAF4	PNPLA2	MYRF
ETV3L	S100A3	GABARAP	FBXO7	CUTA	PIH1D2
NCKAP1L	NCKIPSD	MTF2	STAU1	RNPC3	FLII
NPEPL1	IAH1	ENC1	SPAG9	IFT27	GALNS
RBM47	ZNF250	TMSB4X	RTEL1	STAMBPL1	GOLT1A
RGS14	GLB1L	PCDHGA10	EBAG9	EPC1	KIF9
SLC8A2	SMYD3	PSAT1	IQGAP3	POLE3	CUL9
ACOX2	CA11	ITGA1	MAP7D1	JUP	VGF
ATF3	CYB5R4	PELO	FAM3C	SDE2	IKBKE
GFY	KLHL2	SLC4A7	IL4R	KXD1	ATP6V0E1
HNRNPCL1	ZNF341	HIP1R	PIP4P1	TMED1	DYNC1I2
PTH2	CHRNB4	AAMDC	INTS1	SMC1A	MRPL21
FAM156B	MCF2L	POLR2J2	TAOK1	TMEM123	GRTP1
SENP8	STK16	DAAM1	MTFMT	U2SURP	IGHMBP2
SHROOM3	VIRMA	MARCKS	CHPF2	MRPS27	VRK3
TPD52	KANK1	PAPOLG	NDC1	HOXC6	POFUT2
DLG3	TUBGCP4	TLR6	ATP11A	E2F8	AKAP11
CA5B	MISP3	ZNF480	DAPK2	DNAJC25-GNG10	SBDS
DHRS7B	MLST8	RGS2	SPG7	JMJD1C	NKAPD1
UTRN	BCAP31	HEXB	ZBTB2	SCAND1	ECHDC1
RUSC2	CIAO1	UBALD2	AHDC1	GTF3C6	TMEM184A
ANKRD6	DAD1	POLR1A	EPM2A	RTKN2	BLVRA
CAB39L	TICAM1	ATF4	CLTCL1	ESYT1	RPL12
DOC2A	GDPD5	MRPS31	B4GALT6	DYNLT3	ZHX3
FGD3	PDGFB	HIVEP2	NUP58	EZH2	SH2B1
GMCL2	TIMM22	SLC7A1	NDUFV3	WDR13	UXS1
GPR82	SLC35G1	FAM72A	SMDT1	AXL	USP40
KLK1	RIC1	POLD3	GUSB	PIGP	SELENOO
RAB11FIP4	IRF9	RLIM	SYDE1	PTCD2	TBRG1
SATB2	GMEB2	ZBTB20	KHSRP	ZBTB2	MPG
RFLNB	APOD	MFGE8	SLC16A13	VPS18	RELA
SYT15	EHBP1L1	ETFBKMT	FHL3	SCAF8	SDHD
PCDHGA1	PFDN4	MAGEA2	PSMC3	TMEM101	SYNJ2
TTC39A	SNX6	ETFDH	PTPRU	MRPL48	KAT6A
ZNF41	FAM117B	LARP7	USP19	ZMYM5	GLRX3
USP6NL	CLIP2	GTPBP10	NCOA1	CCDC14	TMEM115
ZNF550	CANT1	TNNT1	SP1	KPNA3	TNS4
PCDHGB6	CHAF1B	WLS	HECTD4	IMPA2	OSBPL7
PCDHGA5	RBL2	ALKBH8	PHF20L1	FOXRED1	SRC
ZBTB38	SAT2	FERMT2	ESAM	PIGK	CPSF1
DOCK9	MAP2K5	WASHC1	GSTT2B	ALG8	ETS2
PSD4	PTPN18	ABRACL	SBF2	PIF1	JPT1
NLRP11	TNIP1	OLFM2	DDHD1	UBXN6	STX8
NLRP4	TNS3	SERTAD3	CNNM3	JUNB	ZNF395
UBE2L3	USP22	BANP	MIER2	PRDM10	FHL1
ALG1L2	VPS53	CENPQ	FAM169A	MSX2	PDGFB
ATP11C	AFF1	RRN3	ANKH	CCT5	DMXL2
ETS1	BMP1	ZGRF1	PLEKHM2	CD44	SLC25A20
GRB10	GDPGP1	EPS8L1	MPPE1	NLRX1	VPS53
MAP3K2	NKIRAS2	RPS6KA5	EFNA2	IFT122	SELENOS
MYOM2	HCFC2	USP49	LIX1L	NDUFS8	MREG
PAQR5	BRD3OS	TXNRD1	DDA1	DCUN1D5	MTCH2
PCDHGA6	CDK2AP2	MTMR14	MED9	TFG	DHCR7
PLEKHA6	CHPF2	LGALS8	B4GALNT3	TIMP2	HEATR5B
PTPRA	DDOST	NAA60	POLH	PTPN4	GPATCH11
SCOC	SLC25A39	SNRPE	SH3BGRL3	MYBL2	RABL2A
TMEM92	TMEM52	TMEM125	POLR2E	SLC39A9	ABCB10
STOX2	DNAAF2	FRK	TMEM38A	MYL6B	URI1
ICAM3	FOXD2	IST1	ATIC	RUFY2	TESK1
C1orf226	SPSB3	MKRN3	RNF167	STK38L	TPGS2
MPP2	FNBP1L	TMCO1	ANKRD40	UBXN4	DDN
ZNF148	POFUT2	SASH1	MYOF	INAFM1	LMTK2
CARMIL2	UBE2G2	NSUN6	AGO2	RANBP3	MDK
PUS7	EXD3	CTH	SLC37A3	NIPAL3	EIF2B2
ABLIM1	MBD1	LTA4H	TLE6	SLC25A16	ACTR5
MFSD4A	RSAD1	ERLEC1	HMGA2	NDUFA2	LYPD3
FYCO1	FBXO7	PRPSAP2	SLC25A11	ZBTB1	CANT1
C4orf3	ATP6V0D1	ATP6V1B2	MAPK8IP1	ATRN	CRYL1
FBF1	LITAF	CWF19L2	BLVRA	ZNF644	ENDOV
CDRT1	CLMN	ASB3	SKI	KIF27	WIPI1
TFR2	PATL1	TNKS	TTLL7	HSPD1	COQ6
RUNX1	ZNF7	OS9	TNFRSF12A	CISD2	FAM161B
ZNF177	AGO1	ZNF776	KLF10	ACSL3	STXBP1
ACACB	LGALSL	SMPDL3A	TMED8	MBTPS2	LSM14B
ETFB	GRK5	BPNT1	FAM102A	RPS13	TSPAN18
GREB1	MMP25	MOSPD1	ANKS3	MBD4	CYP4F22
GSTM1	ENDOV	TNFSF9	MED11	RTL8A	GTF2B
LPAR5	UVSSA	MAGI1	LDB1	ERH	TOX2
LZTS1	A4GALT	RPP40	JAG1	PBDC1	ANKS3
PRDM2	SNX2	HEXIM2	RABIF	SFT2D3	STAT3
PRSS23	LDLRAP1	PBX1	C1orf198	SELENOF	PSME1
TRIM36	USF2	CDIP1	IARS2	GTPBP4	RNASEL
ZNF567	AP1S1	WDR54	COMMD8	DCAF1	PFKFB3
AKNA	DDA1	HDAC8	TM7SF3	ZNF581	ALOXE3
ELF1	PTPDC1	UTP14C	ZC3H3	C9orf43	PHLPP2
ACTR3C	GET4	RBM41	ITPA	SLC25A44	TRAPPC8
GAREM2	INPP5E	OPHN1	RHOA	ZNF33B	PLEKHG4
CDYL	ZNF526	HYPK	ITGA7	SRPRA	JOSD2
DNPEP	DCTD	C14orf132	SYNE3	ALKBH2	TNFAIP3
DICER1	ACVR2B	ABCC2	MKRN2	TOMM7	ZNF860
GFI1	NOL9	INTU	ETV3	NEIL1	CLPP
PC	RAVER1	KRT222	DDX56	JRKL	MXRA7
FADS2	FIS1	RPS6KC1	HLA-DPB1	ZNF485	TRIM32
LNPEP	MAFK	NASP	ZNF517	ZNF335	BCS1L
TRIM22	TGDS	EXOSC8	CRK	SAR1A	LDLRAP1
MOB2	ARFGAP3	BRCA1	TMEM171	NUP205	BCR
	CLASRP	VPS72	CTTN	DCAF6	IFT20
	WIPI1	ITPRIP	ITPRIPL2	CHCHD7	SPATA33
	NHS	TMEM265	ARV1	PBK	NT5DC2
	ETHE1	MRPL35	ARL2	CCDC82	TGFBR3L
	SLC30A4	ACVR1	ZDBF2	GPR158	KBTBD11
	PKMYT1	SUMO1	GYG1	ZNF428	FRMD8
	SLC25A42	DBF4B	SLC9A7	COQ8A	SLC4A2
	ENHO	SLC11A2	XKR8	IK	LSG1
	MRPS23	OARD1	MOB3A	SRRM1	MAP4K3
	TRIM8	SMARCA1	ADAM19	WDR70	MROH1
	SH2B1	ZKSCAN4	FGF9	TIGD2	ABHD15
	NCBP3	SYF2	CXorf38	ZNF217	GXYLT2
	ZBED6	WSB2	TCTA	ANKRD40	FBXL16
	ZNF558	MEF2C	ZNF77	SH3BGRL	CAMSAP1
	ZNF138	SMPDL3B	PLPPR2	TVP23C	ZBTB40
	CACNA1H	POR	SMAD4	TVP23C-CDRT4	PLEKHA8
	DHCR7	RND1	SLC8B1	RABEP1	TRIM3
	WDR45	NIF3L1	NXPH4	WDR4	GRM4
	PEX11G	CRBN	POLR2F	MSX1	RHOC
	IFNGR2	SLC30A7	PTBP2	TANGO6	DND1
	SPATA33	ACSM3	SFSWAP	RNF168	BMP7
	LAMB3	GPD1	BCKDK	ACBD6	SIRT3
	CAPN15	C8orf44-SGK3	GDPD5	ATRIP	SLC27A4
	FAM20C	VCPIP1	SYVN1	EMB	CD63
	TADA2B	CBWD2	FSD1L	PRPF40B	TFEB
	B4GALT7	RBPMS	CFAP69	UACA	IGFBP6
	ARPC4	SPICE1	DNAAF5	IVNS1ABP	TRAPPC2L
	ARPC4-TTLL3	HBP1	KIAA0895L	PCLAF	GOLGA1
	EFR3A	EGR1	TTC21A	CENPU	PSEN2
	EPHX2	ACBD7	MAPK13	COX5B	CYB5R4
	CCDC93	CFL2	TAB2	BRCA2	PRKACA
	RNF11	PAIP2	AFF4	DNAJB1	PLEKHN1
	ARSA	GAL3ST1	HS3ST1	SF1	ZNF445
	BAHD1	TTC30B	ERLIN2	CD46	TARBP2
	MIDN	MAGEA2B	MAPT	DNAJC18	CCPG1
	ZNF608	NR2F1	NADSYN1	ARHGAP35	ARFGAP3
	DVL1	WDR48	DEGS1	TRIM28	DUSP10
	NUP210	RNF144B	TSPAN14	UTP18	LMF2
	BMP7	RYR1	RAPGEF2	ACTRT3	RIMBP3B
	SMAP1	ZNF462	CREBZF	SMIM19	MCOLN3
	B3GNT3	LMBRD1	TIMM22	EML2	RNF111
	AFDN	CROCC	SIL1	FAM172A	PIGA
	C11orf45	FANCD2OS	SHOX2	RHOB	MLYCD
	CCDC6	ELF1	TAF5L	SUMF1	DUSP22
	CFAP45	OASL	CDC42BPG	SUZ12	APOL2
	NAA30	BDH2	CNPY4	KATNB1	GPAT2
	C15orf40	ZNF711	GPCPD1	SYMPK	MAN2B2
	PRMT2	TUFT1	CRIM1	SENP2	BAZ2A
	G6PD	ETV1	TNFSF12-TNFSF13	SERPINH1	POMT1
	CDR2L	NRP1	SH3GLB2	RPL29	TMEM127
	PWWP2B	ARHGAP26	GORASP1	SCAF1	ARHGEF1
	WRN	COL4A5	URB2	TNFRSF10D	HAUS2
	SAMD4A	ZNF84	ITM2C	TBCE	ZNF232
	B4GALT4	BCL11A	PRDX5	GZF1	CDC42BPG
	PCLO	MAT2B	EXTL3	FOSL2	PLPP2
	ENOX1	ULBP1	MKNK1	RAPGEF6	LRRC57
	MFSD13A	PXDN	SLC25A15	HSPA4	BCL3
	LSM14B	TNNC1	ACAP3	RAD54B	ZSWIM8
	AKAP8	UPK3B	EIF4E3	KIF20B	HSPB8
	PEX10	SET	SLC25A51	HINT1	MRI1
	PIP5K1C	FOSB	SRSF4	SRRT	ZNF316
	TPST2	NR2F2	ACD	OCEL1	CTDSPL
	TOMM22	STK24	CRAT	COL4A5	NCOA1
	SLC2A6	CPNE9	FN3K	THAP7	TSC22D1
	TMEM199	RBP1	MEGF11	PCNP	GEMIN7
	SMIM7	GDAP1	STARD3	CNBP	LTBR
	CYP4V2	ICAM1	SERINC5	SERTAD3	RBM5
	LRP5L	ZSCAN16	PCNX2	ZNF627	FAM114A2
	PIGV	TSEN15	MISP3	STYK1	MFAP3
	NSD1	COMT	GTF2E2	ELAC1	FAM234B
	PHF2	ZNF221	SLC22A5	PELI2	KRT7
	B3GNTL1	GEMIN5	ACTR5	CPSF6	MGAT4B
	CYC1	NR4A1	EDEM1	HMGN5	SUDS3
	POLR2C	GAPDHS	MYO1C	MT2A	COBL
	ZSCAN20	ACAT1	POMT1	PPP1CB	C11orf45
	POLDIP2	EPHB3	SLC25A19	AFMID	KLK10
	ATP6AP1	ZNF780B	ZSCAN21	MCL1	CIAO1
	ABHD13	ZHX2	POGK	SP2	TMEM182
	TMCO3	SVIL	CHKB	PNP	MFSD9
	ABLIM3	ZBTB38	C3orf18	TFCP2	C9orf116
	VAMP2	MSANTD3-TMEFF1	XIAP	RTL8C	TMEM141
	ATP5PO	MYOM3	ZYX	MTA2	ANO8
	MYO1B	BAZ2B	PKD1L2	EIF3B	ADNP
	PLPPR2	FBXO8	NIPA1	MCM7	NBAS
	CHKB	LAT2	MGA	C1orf210	PSMD13
	TMEM237	ZNF222	POP7	PRPF19	CXXC1
	CCSAP	OVOL1	RASA2	G3BP2	FSBP
	ITGA7	FOS	MLEC	CLHC1	ZNF888
	CNNM3	GPX8	BTBD11	CDK2	PACS2
	MAF1	SLC7A8	VMA21	ZKSCAN3	CRYBG2
	MKNK2	RINL	ACYP1	RPP25L	FASTKD1
	TMEM214	KIF5A	ZNF500	WDR54	PPP2R1A
	CXCL16	FAM53C	USP33	RBM22	DMPK
	YPEL5	NR4A3	CTNNBIP1	ARNTL2	NFKB2
	GNL2	SRMS	CRYL1	HEBP1	PRRX2
	PBX3	ERICH5	CKLF	ZBTB21	ALS2CL
	NSD2	HSD3B7	CKLF-CMTM1	TTF2	ZNF555
	LMTK2	PAIP2B	MTMR1	EED	PHF11
	PITX1	CDH1	TINF2	PPP1R15A	TMEM150A
	MAN2B2	BCL11B	CNOT11	SLC25A28	NACC2
	WWC3	ZNF493	FAM104A	ZNF764	SEC24A
	EPC2	BET1	CDK6	TAF5	SUSD2
	CDC42BPB	SUV39H1	PSMA7	ACOX1	NATD1
	TMUB1	CEP44	AP1G2	PIGW	ARMH4
	ZNF507	ACTR6	MLXIP	CCNA2	SPNS2
	RASD2	TICAM2	EXT2	APAF1	DBNL
	ARCN1	MOB3B	SURF4	TK1	TMED8
	PMPCA	OSR1	PNN	XRCC2	ITGB1BP1
	MAN1A2	DDIT3	ZNF593	NEK9	TMTC2
	SLC30A1	C3orf62	SOX13	PHB	C1orf198
	TMEM184A	NLK	PPFIA3	NANP	AXIN2
	PLXNA3	TNKS1BP1	CD44	C20orf96	LINS1
	PARP6	MITF	PARD6A	TPD52L2	TMEM51
	MTOR	MXI1	ZNF592	RNF122	ASB7
	CSK	DPP4	SCAP	YDJC	MYORG
	ULBP2	SYTL3	ANK1	NOMO1	PTPN18
	DLST	SLC2A12	SLC25A35	GDE1	GPAA1
	MDM1	PRRT1	MCPH1	SPATS2	STEAP3
	VPS13D	ANAPC10	TMEM127	PITHD1	YPEL5
	VCPKMT	MACC1	ATAD3A	MND1	MYO1C
	SNX21	MAP1B	NET1	CCDC167	MOCS1
	RAB11FIP3	PRDM1	PKD1	MFGE8	KMT2B
	JMJD4	ITGB1	SCYL3	MED21	VEZF1
	ZNF316	GRHL3	DGKH	CMC1	STX4
	ZNF445	ARHGAP40	G6PC3	SNF8	PANO1
	ERGIC1	FARS2	PKNOX1	MCM4	AHDC1
	SPECC1	COL17A1	HM13	GMNN	COG7
	TBC1D14	ZNF516	STIP1	MAZ	ZNF668
	CALR	TIMP3	SEMA6A	SMC5	P4HA2
	ADCY9	PARM1	METTL9	UBE2A	CHPF2
	PATZ1	LYRM4	PARD3	TUT1	MID1
	EPS8L2	PRIM2	PLCD1	VCL	MYLK
	AP1M1	GLRX	NFATC3	CTDSPL2	MICALL2
	SNX33	CENPW	C11orf80	N4BP2	TTC9
	DCUN1D2	GOLPH3L	MAPK8IP3	TMEM97	ARHGAP44
	TALDO1	ZNF587B	MIF4GD	SWSAP1	ACAP3
	NCLN	ECH1	MIEN1	NES	B3GNT4
	DNAJC12	ARL14EPL	TBC1D25	PTER	PCSK7
	HSDL1	HAS3	APBB1	OTUD3	PXK
	DLG1	EGR3	SNED1	PIK3CB	ORAI3
	THEM6	EIF4EBP3	TNS3	HOXA7	NUDT14
	COASY	ZNF266	LETM1	IMMT	DGKD
	KLC3	ACSL1	RPL26L1	TMUB2	LGALSL
	TCFL5	PCDHGB2	CNBP	SNRPD1	SLC4A11
	HEMK1	ASNS	AGPS	NR4A1	TSC2
	NINL	ATF6	KANSL3	EIF4E2	MAP1LC3B2
	CDC42BPG	ABLIM1	ACP7	NUDT16L1	RNF214
	GOLGA1	PTP4A1	MAPRE1	ACTR3	CYB5A
	RHOC	SUSD4	ZNF710	S100PBP	ADAMTSL5
	GATD1	MRPL22	SLC52A3	RSF1	FAH
	GNPDA2	NCAM1	RHOT1	UBAP2L	GAPDHS
	BAG5	HSD17B1	HEATR3	EIF1AX	PRSS22
	CLK3	CFD	SYBU	THNSL1	CPM
	HSD11B1L	ZNF350	TMCC1	PPAN	RIPK4
	SLC25A29	AASS	PTCD1	PPAN-P2RY11	SMARCD3
	RAB31	PCDHGB1	TBCB	AVL9	CNN2
	STK25	SYS1	TTC8	HOXC9	KIF21B
	TPRN	CSTA	ERF	CDCA7	SOX8
	AP2M1	SLC2A11	ZNF18	MED6	SFXN3
	DSN1	FOCAD	GMPR	RPS27A	PDZD7
	TAF5L	ZNF772	ZNF554	GCDH	CAP2
	PRELID3B	PROM2	NIPSNAP1	SP3	CISH
	RNF144A	FAAH2	ASB6	RMND5A	GATA2
	TSPAN18	SLC7A11	PTP4A2	MITF	SCYL1
	MRPS6	AKR1C3	RDX	SPIN4	NIPSNAP3A
	SLC5A3	ZNF502	STXBP1	ZCCHC17	NTHL1
	MYPOP	KLF4	SULT1A4	MCAT	TDRD7
	ATG4D	CBWD1	EIF3B	LYRM7	TTC21A
	URB2	NCOA7	DNM2	MRPL1	GORASP1
	TMEM248	PHGDH	RRBP1	SNRNP40	EPB41L5
	KCTD14	FUT8	ARID1A	MAP3K14	OSGIN1
	BIRC2	TSPYL4	SHROOM1	DMXL1	KIF1C
	FAM193B	DSE	IRF2BPL	TUBGCP6	MAPKAPK3
	FOXO3	ZSCAN29	CIAO1	ZNRF1	NDUFS7
	CHST14	SH3BGRL2	GSK3A	MYLIP	SLC22A18AS
	RYBP	GRHL2	TPCN2	DNAAF3	TSPAN4
	BRF2	CTBP2	HAUS2	RAB8A	KBTBD8
	COPS9	ZNF595	GPRIN1	MRPL57	LACTB
	SLC9A6	TBC1D19	CDKN2AIPNL	ZC2HC1A	UPK3B
	GAN	SPTSSB	RCC2	STXBP3	EPB41L4A
	SLC10A4	RGS20	TESK2	MTERF1	MYL9
	EML5	CD24	ANO10	TRIM25	IL17RD
	STAT3	MAPRE3	ZNF354A	KCTD20	CLDN23
	IFT27	PCDHGA5	CRTC3	PAN2	PIP5K1C
	CAD	IGFLR1	UBE3C	TIGD1	CCDC92
	CIC	TRIML2	LRAT	UBE2D2	SNX7
	AKAP1	WBP1L	WWP1	DCP2	ZDHHC14
	MPZL1	FBF1	RPS6KA3	C12orf60	UCKL1
	NACC1	SPIN2A	ZNF358	ZCCHC3	CDKN1A
	ZNF778	FBXO16	NAA30	TSTD1	RNF166
	CDC25A	SPOCK3	PAFAH1B1	UBE2R2	CTU2
	LTBP4	SMAD7	PPM1G	RHPN2	MYZAP
	ABHD15	PDK4	LRRC57	CKB	PNPLA6
	IKBKE	LNX1	RNPEPL1	CLOCK	SLCO3A1
	SGTA	ID4	UBASH3B	KIF24	KCNH2
	ZC3HAV1L	SPIB	JMJD4	STRAP	SSH3
	INTS11	MPP7	LGALS1	SKA3	TTLL3
	SUDS3	TMEM200A	BRD7	TRAFD1	SDHAF1
	GAA	TEX45	LDLRAP1	ZNF451	FBXL6
	MSRB3	CHAC1	PAPSS2	LYPLAL1	FBXO2
	TRAPPC9	ACSL5	LLGL2	RTN3	EPS8L2
	GOSR2	SLC2A3	PGS1	TERF1	KIFC2
	GRTP1	GPR15	CLINT1	RPS8	NOTUM
	PSEN2	PLAT	DDHD2	CDK5RAP3	MTRNR2L6
	CDKN2AIPNL	TBC1D5	MAPKAPK2	RBBP7	RBM24
	MFSD6	AKNA	HOMEZ	SMARCA1	HOXB4
	TESK1	RGS4	APPL1	ITGA1	SLC30A4
	TOP3B	ISL2	HEYL	PELO	JCAD
	IGF1R	NT5C2	ZNF654	MIS12	VSIR
	CIB2	ATF7IP	RAB28	BYSL	CASKIN2
	MARVELD3	PCDHGB6	TBC1D1	HLTF	HDAC10
	PFKFB3	GPR75-ASB3	PPP1R3B	NTSR1	LGR4
	DGKD	ZNF773	ALDH7A1	DLL4	RHOD
	HAUS2	CASP10	RWDD4	TNPO2	SULT1A2
	GLRX3	PLCB2	CSF1	PAICS	FXYD3
	ACY1	CBWD3	AP3B1	HMBOX1	ISG20
	RHOBTB2	PDGFRL	NSD3	AP4M1	ZNF778
	OTUD1	CFAP44	UPF3A	SGO1	SLC52A2
	TMEM243	ZNF804A	LIPT2	FGGY	KLK6
	KCTD18	VCAN	THUMPD2	BCAT2	FBXO44
	ZFHX2	PCDHGA8	PHF7	SF3A3	MAMLD1
	NLE1	IKZF3	RCBTB2	C1D	ANO9
	TAF1C	SLC38A1	IFT20	TIFA	KSR1
	CCNJ	GLIPR1	MTRNR2L8	FANK1	ARFGAP1
	C7orf50	VIPR1	SOX9	TXN2	THBS1
	AGPAT3	SPOP	CXCL16	EXOSC9	SAMD12
	LRRC57	TANK	PCNX1	CDX2	LRRC3
	INPP5F	FGF2	ZNF121	CCNH	ZBED6
	DIS3L	ST7	ZFAND2A	NR4A2	PPP2R5B
	RALGPS1	CALCRL	EOGT	JMY	SULT1A1
	EFHD2	ZNF155	KAT14	NUSAP1	RUSC1
	BCL2	PREPL	RAB22A	PPAT	LMCD1
	CCDC85B	FN1	GZF1	DNAJA3	EPAS1
	CEP170B	CPVL	LRRN2	DIAPH3	MAN1C1
	GRB7	CALD1	RND3	OIP5	GALNT5
	TDRD7	RPH3AL	CAPN2	PLAUR	EFCAB14
	GSTO1	SGPP2	EVI5L	RNF34	PDGFA
	CDK18	CBWD6	EIF4G3	BBS4	SEMA3B
	MEGF9	SULT2B1	FADD	DHX15	SMIM12
	ZNF623	MAST4	ETNK2	WBP11	PLD1
	GSK3A	MKX	USP35	ZNF358	MICALCL
	PLCB2	SRC	SNTB2	GPX4	PGGHG
	SRSF1	ANGPT2	DCBLD2	GTF2IRD2	PTPRU
	MROH1	CD33	WWP2	HNRNPA2B1	AFDN
	SETDB2	ZNF550	ZNF341	TSPAN6	RBL2
	SETDB2-PHF11	SLC20A2	KLC1	ZKSCAN4	DPP7
	SIRPA	TRIM39-RPP21	UBE2K	SARAF	UNC13D
	TLE1	GCNT3	PITRM1	TOMM20	AKT1
	MTA1	DHRS7B	CARMIL1	SNRNP25	ZBTB42
	CPTP	UTRN	SAMD1	GALNT10	HABP4
	COG7	RUSC2	RALGAPA1	EXOSC2	ADGRF1
	ARHGEF1	ANKRD6	PPIL6	DEK	CHD3
	BTBD3	CAB39L	RAB36	SHKBP1	TMEM151A
	YIF1B	DOC2A	USP27X	ITGA3	CD83
	CCDC40	FGD3	PET117	RPS7	IKZF3
	ARL8A	GMCL2	AFF1	CDKN2D	EIF4E3
	TRIM21	GPR82	ZNF721	MED20	IL18R1
	ELFN2	KLK1	RER1	ZNF738	RAB26
	PLCD3	RAB11FIP4	SRPK2	HYI	RPS6KL1
	EXOC3	SATB2	HINT1	RRM2	CYP4F3
	KCTD6	RFLNB	CGGBP1	SLC25A33	TJP3
	CSPG4	SYT15	DCUN1D3	HERC1	CCDC93
	ZIC5	PCDHGA1	IDS	PAN3	PRKCD
	HOXA10	TTC39A	GLTP	SIRT5	SCUBE1
	TRIP10	ZNF41	MORN1	TMEM53	SMPD1
	SEMA4B	USP6NL	SEMA4B	MORC2	ABL1
	KIAA0895L	SGK1	TM2D3	UQCC2	RFNG
	PPDPF	MMEL1	IQSEC2	TXLNG	MYO5B
	UBA2	DYSF	FNDC3B	ARHGAP11A	FBXO31
	WRAP73	GSTM2	TTLL4	MED17	MTRNR2L2
	USP19	LGALS7	LMBR1	ZNF286A	GPS1
	CDK10	BRSK2	NAT9	CYTH2	PLCXD1
	NEPRO	LGALS7B	ARPC4	SPATA24	KLK7
	PHYH	PLTP	ARPC4-TTLL3	NRF1	HCFC2
	TMED8	NEDD4	PIGG	FAM174A	WIPF3
	ADAP1	HSPA2	LIG4	INTS9	SIPA1
	ACAP3	ANXA10	ENO1	SCAF11	HOXA1
	GLE1	NFRKB	ACY1	PPP4R2	KLHL36
	TMEM128	RPSAP58	PLA2G6	PA2G4	BTBD11
	NFE2L3	EFCC1	PHYKPL	PMEL	OBSCN
	SAAL1	SMIM14	ATG101	ZNF780B	MTRNR2L1
	SHARPIN	SRRM5	MTMR10	RHEB	TSEN54
	ACSF3	DTNA	KIAA1671	TSEN2	WNT7B
	ASAP2	LYNX1	ITSN1	PTGER4	RTN4RL1
	TEX261	CC2D2A	RFX3	SNAI1	ELMO2
	MSL3	MUC16	IAH1	SUGT1	MTHFR
	QTRT1	PCDHGA7	NABP2	KLF5	SYNC
	ARFGEF1	EML6	MBD3	IKBIP	HES2
	BOLA3	FOLR1	MTMR9	PHC3	MVP
	NARF	FXYD1	KLRC3	CHAC2	ZDHHC8
	DPY19L1	KRT6A	RNF10	SLC16A1	METTL26
	RNF111	LMTK3	ADRM1	CDC7	WNK2
	ZFP1	PPP2R2C	CCNO	MCU	HECTD3
	SEC24D	SLC26A4	TAP1	USP48	NEK3
	UXT	SEMA3C	B4GALT4	THEM4	SLC25A22
	MIB1	APOBEC3A	MIOS	NUP50	TCEA3
	DOCK7	LFNG	ACSS2	APOBEC3B	HOXB8
	RIBC2	PCDHGA2	SLC35G1	ACADM	USP6
	CNTROB	SH3PXD2A	PHLDA3	TYW1B	KLK5
	LMF2	SLFN13	TMUB1	TAF1	FBXO46
	GRHPR	SORBS3	NHS	LIG3	DPP9
	LRRC42	PITPNM2	ATP2B4	RNF5	SSTR5
	PARP12	LYPD1	HOXB6	ADGRV1	PROM2
	SORT1	RGS12	TRAPPC11	LGALS8	SLC16A3
	CTSZ	TUBA8	VANGL1	FARS2	FGF18
	C1orf198	UPK1A	FBRSL1	CTH	ACVR1C
	MRM1	PCOLCE	NOL7	PDCD7	RAB6B
	TMSB15A	SNCG	NINL	SPRYD3	TMEM59L
	CCDC96	PLAGL1	C4orf48	MAD2L1	SAMD11
	C8orf76	MFSD4A	FBXO5	FXR2	CUEDC1
	ZNF275	RAI14	ARMC3	POC1A	SH3TC1
	EXT2	BICDL2	PLIN3	DUS3L	DBNDD1
	KLF16	ADGRE2	ZNF174	TCF12	PIK3CD
	MRPL36	FYCO1	PPP1R26	PTMS	PTK6
	POLR2I	KLHL15	LRP5	NUDT2	RIMKLA
	ZDHHC1	TRAK1	ZSCAN32	HFE	SLC27A5
	SELENON	PCDH7	TRMT112	ZNF816	PITPNM1
	EEF1B2	ST8SIA1	SIPA1L3	ZNF816-ZNF321P	PTCH1
	GSE1	NHSL1	DLST	REXO1	RAC2
	FAM222B	KIAA0930	INPP5A	ANKMY2	MAPK8IP2
	RSPH1	PALM3	SEMA4C	PIGL	MGLL
	PUDP	MIA2	KIF21B	ABHD11	PRKAA2
	SNX4	ARHGAP32	DRG2	SNRNP70	RGCC
	MKS1	TACC1	SMARCD2	ANKRD18A	DDX59
	CELSR1	ACACB	TMEM104	KCTD5	CCDC124
	SAMD1	ETFB	MKLN1	CDK19	EPB41L1
	ZNF576	GREB1	CCDC6	ALG10B	C3orf62
	BTBD11	GSTM1	MESP1	PLEKHO1	DFFB
	SLC27A4	LPAR5	TMEM199	CANX	CEP104
	BCL7C	LZTS1	TSNAX	DYNC1H1	CYB5R3
	ABHD14A	PRDM2	YBEY	C14orf93	PPARA
	ABHD14A-ACY1	PRSS23	PATL1	TIPIN	ARHGAP45
	TADA3	TRIM36	WRNIP1	RALY	A4GALT
	FBXO9	ZNF567	HACD1	ZNF24	CLIC3
	PRKCI	FDFT1	GAS7	IER5L	SATB1
	C19orf12	SYNGR1	USP42	RNF26	SMAD7
	TSPAN9	RUFY3	PHF10	FSD1	RXRA
	C8orf58	UBA5	LRP11	TEN1	NOL4L
	TMEM63C	ZNF160	SMCHD1	TMEM258	SYCP3
	TBCD	TCEA2	PPP2R2D	TAF10	SUSD4
	ZBTB14	CDYL	LATS2	DNAJC11	TBXA2R
	PFKL	DNPEP	USP36	BTG1	RELB
	SERINC2	DICER1	HDAC11	KDM1A	PRICKLE1
	TBC1D10A	GFI1	MSH6	HTD2	KRT10
	DHX35	PCDHGB7	ARHGAP8	RPP14	TIAF1
	TAOK1	FADS2	EGFR	WIPI2	APOBEC3H
	KIF1C	LNPEP	TADA3	RPL35	TNK2
	TBC1D25	SPARC	ARHGEF10L	SLMAP	MRPL14
	C7orf25	NOS3	RSPH3	PURB	TMCC3
	TRIM32	NECTIN4	NEPRO	RAD54L	TMOD1
	XKR8	CLEC11A	CYB561D2	RPL22	ANAPC7
	NUAK1	PHLDB2	DENND3	DEDD2	S100A5
	EFCAB14	PGBD3	PLPP6	AAMDC	GADD45G
	CYHR1	CMC2	NPRL2	SPDL1	TNNT1
	MSLN	MT1A	ZDHHC2	FAM72C	MAP3K12
	EFNA3	ARHGAP39	RIC1	CLK1	LRRFIP2
	C20orf27		POLDIP2	NCAM1	MEST
	PAPSS1		SMPD2	ZNF747	SEMA4G
	AADAT		ZNF436	CREB3L4	NBL1
	MFSD5		VPS36	GLA	EPN3
	ENTPD2		RABL6	MSRB1	GNPTG
	UNC13D		GMDS	OPHN1	TSR3
	MLLT6		IER2	FRAT2	OLFM2
	POMT1		NEO1	TMSB10	FBXO10
	HTT		DIS3L	UBAP2	IQCK
	PAK1		CYP2R1	PRKDC	SCN3B
	NMB		EMC3	DFFA	PTPRH
	PDE5A		RNF217	DARS2	TACSTD2
	SOX4		MAF1	DHPS	PSMC1
	WEE1		OSTC	CIRBP	ARID5A
	NXPH4		STX2	WDR12	GAL3ST1
	PTMS		TMEM63B	GTF2A1	HIF1A
	LHPP		SRD5A1	C1GALT1	AOC2
	BAX		KLHL5	ABCA1	ADPRHL1
	GPAT2		NCAPG2	AASDHPPT	TICAM2
	PAM		STX10	ACOT9	NLK
	ERAP1		ZNF623	OGDH	MAML2
	AGAP1		CXXC1	LRIF1	RC3H1
	DPH7		GOLPH3	TYSND1	GRHL3
	ONECUT3		LAMC1	UBP1	SECTM1
	STK3		TTLL12	EIF3L	FES
	ING2		RRAGC	ARPC5L	KRT15
	ESPN		DDB1	HIGD1A	GNAL
	CHTF18		CDK2AP2	N4BP1	EPN1
	SLC38A10		ANKEF1	DMTF1	CALML4
	NME1		NOM1	LYRM4	PACSIN2
	SMIM11A		FAM214B	SQLE	GPR15
	TSR1		RASAL1	ARSD	CD59
	SCYL1		TCIRG1	AKIRIN1	MCRS1
	LRFN3		TAF1C	NRG2	RHBDF1
	SSX2IP		CNTROB	LIMA1	RPH3AL
	MARK3		HSF2BP	PRDX5	LIMS2
	IRGQ		ZFAT	SEC63	MMRN2
	OSBPL7		CYB5R1	HSPE1	NOS3
	FLYWCH2		LITAF	HSPE1-MOB4	CPT1B
	LMCD1		LRP12	AHCTF1	ALOX5
	SEC24A		SFXN5	DYRK3	GLT8D1
	RHBDF2		MID2	RPS26	LIF
	TBC1D2B		DLK2	BICD1	TMC8
	CHST12		SIRPA	RPL8	ZNF587B
	CRYBG2		NME3	ZNF786	JAZF1
	CDKN1A		LSM4	ITGA6	SH3BP4
	RBBP9		NOL3	CENPL	INPP4B
	METTL5		MSANTD4	CCNB1IP1	S100A2
	TMEM185B		MDFI	XPOT	CCDC12
	AGPS		PRICKLE3	ZNF628	PALM3
	SMYD2		ZC3H14	FAM43A	PHLDB1
	ZNF517		SHB	JADE1	ZNF814
	KCTD11		RFX2	DUSP1	ITGBL1
	LRAT		NUBP1	RIF1	BRD1
	PAK6		LRFN3	RHOV	ACOT11
	DNAJB2		PLOD1	RPS5	FADS2
	ZBTB4		MOCS1	FAM83D	DICER1
	ANK1		PHF1	CDCA3	ZNF160
	PCSK7		ARMH3	TMA7	TCEA2
	DUS1L		MYO1B	TOB1	SLC5A5
	RNF214		CCNF	DENND6B	ARHGAP32
	FZD3		SMPD1	SNIP1	BRD4
	MYO1C		TUBGCP4	SLC35F2	RGPD4
	WASF1		PML	TOMM6	SPARC
	PPFIA3		CLTA	RPS4X	LETM2
	D2HGDH		SPNS1	SNRPB	MIA2
	GABRD		PXMP4	USO1	RIMBP3C
	PARP16		CAMTA1	SPC24	GFI1
	CASTOR1		CEP131	MRPL45	UBE2F
	PAQR7		PIP4K2A	SEMA3G	SLC29A4
	GRAMD1C		HCFC2	MOSPD1	ZMAT3
	UQCRC1		BAP1	SRSF8	DNAJC6
	SPNS1		CDCP1	OGFOD2	SPTBN4
	PHF20L1		SDC3	CILP2	LGALS9
	TMEM185A		SCNN1A	NFIA	CFLAR
	SIRT3		RRP1B	CCZ1B	PKP3
	RPUSD1		ULK2	CCDC51	ELOF1
	ICMT		CIPC	LMNB1	CYP26B1
	CDK5R1		EFR3B	SIAH2	PILRB
	COPG1		GSTK1	LARP7	PC
	MTCL1		OTULIN	RILPL2	BAIAP3
	STMN3		RAB11FIP3	CBX6	HS6ST2
	CSNK1G2		SRSF10	RPS17	MOB2
	PLEKHG2		SMAD2	RPTOR	KIAA0930
	KDELR2		NOD2	RBX1	NECTIN4
	NT5DC2		NFYA	LARP4	SLC15A1
	DNAJC4		TMEM59L	VPS45	LPIN1
	NABP2		DOCK5	HDAC6	EHF
	ORAI2		DBNDD2	RAB4B	BCAS1
	CPT1A		U2AF1	C1QBP	MAPRE2
	URI1		CMTR1	WDR44
	BCAR1		TAF6	NOCT
	UBQLN4		B3GNT3	FAM241A
	ASAH1		PM20D2	ZNF546
	TMEM223		PARP6	INTS2
	NSMF		NSMCE2	VDR
	MLLT1		WDR37	TCEAL9
	PIGA		ITPR1	HNRNPH2
	JOSD2		ZBED4	SAMD8
	MRPL41		MGAT4A	C1orf43
	BRMS1		ADRA2C	MELK
	SYNE4		ATP1A3	ATF7IP2
	SLC44A2		CGNL1	NOL11
	CHST2		FBLN5	EGR3
	UBAC1		NSUN2	TRA2B
	TBCB		PARVA	BMPR1A
	SEMA4C		SNAPC2	RBM14
	GPSM1		COPG1	RBM14-RBM4
	GAL		RSPH1	YWHAG
	CKAP4		RUFY1	C5orf63
	CASKIN2		SYP	REEP2
	SPTB		HYAL3	U2AF1L5
	SPINDOC		SSNA1	NUP133
	PSMD13		ATAD3B	ATP6V1E1
	IQCE		CFAP46	TTI2
	TRIQK		ZNF48	AURKAIP1
	PLPP6		IFNLR1	KEAP1
	NFIX		STARD10	GNAI1
	ZNF696		TMEM54	ANKS6
	SPTAN1		MICALL1	FANCC
	PHLDA3		TRIM9	AREG
	SDHAF1		LPCAT4	AMBRA1
	IBTK		ABHD15	C21orf58
	CLPP		PKM	UNG
	DBNL		CBL	ZNF487
	NR2F6		ZDHHC23	CCT4
	MNX1		RNF207	RBMXL1
	DIP2C		WEE1	BTN2A2
	ECHDC3		SOX4	RFESD
	TTC21A		MT2A	STIL
	GORASP1		ANAPC2	BAX
	CAVIN3		ZNF28	PEX2
	C12orf75		IFIT3	PRC1
	ZNF358		TKFC	SNTB1
	SPG21		ERI1	CHAF1A
	SAC3D1		SUZ12	BNIP3L
	TRIP13		LRP3	PPM1B
	TMEM181		PIK3AP1	TIMM23
	C2CD2		SNX9	STAG3
	TRAPPC1		KDM2A	GPC2
	BTN3A1		UBE2E3	MAGEA12
	ISYNA1		TRIB2	ANAPC10
	ARFRP1		SLC37A4	ALDH3A2
	COMMD8		ZNF771	POMK
	PPP6R2		GOLGA5	EHD2
	ZNF500		WASHC5	FAT4
	ID3		RAB43	POLA1
	SLC25A10		CXXC5	BZW2
	BEND7		ANKRD10	POLR2E
	DRAXIN		GPR180	HINT2
	PPP1R35		ARHGDIA	GLCCI1
	PLEKHA1		TPRN	TVP23B
	PIK3AP1		RITA1	METTL15
	ETS2		RNF126	PSRC1
	RPS6KB2		MAMLD1	EIF3E
	GATA2		UBE2Z	HCCS
	SMIM20		ZDHHC8	SUMO1
	TEX264		ENPP1	GEM
	TFEB		ENTPD5	KBTBD3
	ADAMTSL5		GMPPA	CCNG2
	TUBGCP2		SRXN1	CAMSAP2
	CHID1		MKS1	FOXRED2
	NPDC1		ACVR1B	MANBAL
	SHOX2		ZNF865	FN1
	PRKCZ		ZNF473	DNAJA2
	KANK2		SLBP	RAD51C
	SH3BP1		LMBRD2	RRP15
	NLRP1		ADO	EIF4EBP2
	CTU2		STAT3	UTP6
	ARMCX3		ATP5MC2	TTK
	DHX33		GJB5	ADAM9
	ZSCAN21		PTPRF	B9D2
	CERS4		PREB	PRPF40A
	REXO4		SLC25A28	RNF103-CHMP3
	ASPHD2		SLC35D2	UBAP1
	FXN		ZBTB12	OLA1
	NDUFS1		ATXN2L	DHX36
	SLC25A4		PAQR8	PNRC2
	SLC7A2		SEC61B	AIMP2
	POMGNT1		ELMO3	ETV4
	RNF166		QKI	ATP6V1G1
	GLI4		IRAK1	ATAD2
	GFPT1		LRRC75A	MRPL3
	AKAP11		TALDO1	GLI1
	CYP4F11		AKAP11	NIPA2
	FBXL16		ABI2	TOPORS
	FHL1		NRIP1	ARL5B
	PLPP2		TDRKH	SMURF2
	LZTS2		SMTNL2	PMS2
	MPC1		HSPA8	SPATS2L
	CARD19		TXNRD3	HDAC4
	TBC1D10B		KAT6A	KMT2E
	CST3		ATG4D	PSMA1
	ILKAP		KLHL2	MLLT10
	FBXL18		ZDHHC18	CDS2
	FRMD8		MGRN1	MXD4
	TAF6		SETD1A	PSMC6
	KLF2		PHF20	POLQ
	MOCS1		SELENOO	TM2D2
	CUL9		MAPKAPK5	USP1
	TYMP		KRTCAP2	KIF18A
	KDF1		AFG3L2	PRMT1
	ZNF185		CASKIN2	DMAP1
	NDUFS7		AGO1	RFC5
	MINK1		ZXDC	EPB41
	KLHL22		LPIN3	PPFIBP1
	GLIS2		MCM3AP	UNK
	PLCB3		PRKCI	RGS2
	NUBP2		SMYD2	SMS
	CD151		SLC9A6	KHSRP
	SENP3		C9orf40	GMPS
	PACS1		FANCA	EIF4G1
	TMC6		GLRX3	BDH2
	ANO8		DHCR7	RPA2
	YKT6		DNAJB1	ZBTB25
	MID1		SAMD10	PPRC1
	FAM114A1		MCOLN3	SPTSSA
	ZFPM1		LRCH3	ZNF212
	TGFBR3L		CABLES2	INPP5J
	RCOR2		NCBP3	TMEM41B
	KRT19		GALNT12	MAT2B
	UBTD2		HPS6	KIF15
	ACE		ENDOV	MGME1
	ARMH4		UPF2	NANS
	SH2B2		KIFC1	CCNC
	SDHB		PPM1H	PRPF38B
	TULP3		LSM14B	TP53BP2
	GJB5		MKNK2	EPM2A
	NEK6		SUDS3	ZC3H6
	CNPY4		DUT	MPC2
	PSME1		DAGLA	GABPB1
	AP2A2		IL13RA1	CDKN2A
	LRFN4		P3H4	ZNF784
	LTBR		ARRB2	SMAD1
	HOXA13		PES1	KIAA1143
	ACD		DOCK3	NAP1L1
	KAT6A		HSD11B2	FHL2
	ZNF654		ASAH1	TAF1B
	FAM89A		TNFRSF10A	KMT5C
	ALS2CL		SLC7A6	ABCC2
	INF2		TICAM1	FAM167A
	PPM1H		SAMD5	NR1H2
	CRLF1		ANKLE2	ANKRD10
	DYRK2		SLC16A5	EBP
	SH3BP2		KDELR3	MARK1
	GALNS		DUSP28	SEMA6C
	PRRX2		ZBTB39	TEAD2
	TM7SF2		INAFM2	FANCL
	TANC2		TMEM87B	FAM13A
	FCHSD2		AIFM2	CNOT10
	TSPAN33		NPDC1	C19orf48
	HSPG2		ABHD11	POP4
	CTSD		PRELID2	ZGRF1
	TRAPPC5		BAHD1	C12orf57
	CGGBP1		PRR14	PRR13
	KSR1		HECW2	ABHD3
	TSC2		MIDN	JPT2
	ELMO3		KLF12	PDE3B
	RAB40B		LGALSL	ID2
	PLPP5		DHX37	KBTBD2
	RASSF5		MRPL40	COX16
	RASA3		ACTR3B	METTL3
	RAB4A		ATP8B3	SECISBP2
	GPR173		NAPEPLD	ATF7
	TFDP1		SPECC1L	DEPDC5
	CDON		SPIN1	DDB2
	CALU		WDR35	ZBTB5
	PCYOX1L		KCNQ2	RPS24
	PAPSS2		RAB4A	TRAPPC6B
	MROH6		SLC45A1	NICN1
	NME4		ZNF488	PPP2R2A
	UBE2D1		ANKRD39	STAG1
	INSIG1		SMAP1	UTP14A
	TMEM184B		RTKN	TM9SF4
	NAA10		KANK2	SERTAD1
	KAT6B		OSBPL10	PLEKHA2
	GOLGA3		ZNF737	CCDC113
	TSNAX		CCM2	PNISR
	HECTD3		RPS6KB2	ZNF609
	PDK3		TMEM223	FBXO21
	PRKCD		SIRT5	SRSF10
	SAMD12		NDOR1	SEPSECS
	AFAP1		ARMC6	CHCHD5
	C11orf95		NES	RAP1GDS1
	KMT2B		GLE1	CTR9
	PLD2		SLC6A20	ATP6V1C1
	NTHL1		HES6	PELP1
	PRSS22		ADCK2	WDPCP
	DENND2D		REEP3	HSPA13
	TMEM132A		PRMT2	RPL13A
	SRM		CIB2	GEMIN8
	NXN		OSBPL7	DNAJB4
	PPP1R3E		SEZ6L2	CDK12
	PPP2R5C		KLK8	DHTKD1
	TAF6L		SUN2	POLR2A
	LTBP1		TARBP2	ZMYM6
	PELI2		ABCA7	RPS20
	RAB20		NME1	FOSL1
	ZBTB42		TMEM203	ATXN2L
	NIPSNAP3A		FBXO27	ATP5MC2
	UGT8		ERICH1	CTBS
	TRAF3IP1		ELOB	IBA57
	DUSP22		DCAF5	FSCN1
	KIFAP3		BCL3	UBALD1
	MSANTD4		KCTD18	MRPS17
	SND1		TMEM248	CDH1
	ZDHHC4		CDC42	ALCAM
	PRKAR2B		CYB5R4	DOT1L
	IQSEC2		IGF2R	MRPS22
	ANTXR1		SMURF1	FAM136A
	MICALCL		PRKAG2	PTGR2
	ZGPAT		ZNF445	VPS37C
	MRPS5		COPG2	CALM2
	PRICKLE4		ZPR1	WTAP
	ADA		CCDC102A	PTPN1
	TCN2		C1orf174	CREM
	NUDT14		ABCC10	NOLC1
	LMBRD2		ZC3HAV1L	PCNA
	HUS1		ZNF395	PRKRA
	ABCB10		KLHL21	TBCEL
	MAPK12		ENDOG	TTC32
	CTSH		KANK3	MRPL51
	ZDHHC8		TEX261	DCAF12
	TUBG1		AADAT	C2orf68
	E2F4		PLLP	NR1D2
	ALOX5		PLEKHA7	NPM1
	AXIN2		WIPI1	SELL
	GSDME		RNF141	ZNF646
	GAMT		HTR1D	SLC16A6
	PDIA5		CERS2	PUM1
	PTGFRN		MYO5A	BCOR
	WDR18		TRAF3	PHB2
	FAM160B1		RNF19B	DUSP14
	NUDT22		DDX60L	ZNF691
	MYLK		C7orf25	TOP1
	BCR		MRPS23	NECTIN3
	ZNF511		CDT1	WDSUB1
	PSMC3IP		NDUFS1	ELP6
	ADD1		AVEN	KYAT3
	CPSF1		EIF4ENIF1	PHF14
	CAMSAP1		BOP1	MSH2
	ANKS3		UQCR11	PGAP3
	TP53INP1		S100A6	PNMA1
	NAV1		ZNF860	TAF7
	KIAA1522		ANXA6	BMP4
	KCTD12		C12orf75	SNRPF
	ABCA1		SLCO3A1	DERL2
	ISG15		BCAR3	EEF2KMT
	TTYH3		SIRT7	CWF19L2
	CBARP		CCDC130	EIF2S3
	RNASET2		OLFM1	ERBB2
	ANO9		SLC39A13	ZNF687
	EPB41L4A		REPS2	DHRS4
	KIAA1549		SKP2	CSNK2A1
	TMEM63A		MRPS5	SUN1
	NUCB1		ICE1	PRPF18
	TRABD		FOXA3	EEF1E1
	C4orf48		DCUN1D4	EEF2
	TONSL		PSMG4	GDA
	TRAPPC2L		PIM3	PEAK1
	HGSNAT		GPI	DHX8
	SAMD10		SPPL2A	MBTD1
	CPQ		GAS2L1	ALG13
	TBC1D9B		DDIT4L	TES
	RETREG3		GNA11	SOX4
	CASKIN1		DBNL	RPL17
	ARFGAP1		ATP6V0A1	HMGB1
	SLC52A3		ZNF598	TARS2
	PSMG3		MANF	SMARCC1
	MFAP2		TRIM7	ATG9A
	GOLT1A		YWHAH	RFC1
	PTK6		FAM86B2	ZNF572
	DPYSL5		SIM2	PGLS
	GCC1		COQ2	CXorf56
	KCNS3		ARFGEF1	FMO4
	CPNE2		PXN	MCM2
	SKP2		USP46	INO80B
	TGFB1		PSMD13	EIF1B
	TMEM25		KHDRBS3	NAB2
	TPBG		DCTN1	WLS
	IL17RD		SEH1L	TRIM66
	AHDC1		ANKRD36B	CSDE1
	SNX7		BAG3	SH3D19
	CEP104		SGSM1	UBE2B
	MBNL3		NDRG2	NFYC
	RPH3AL		SSBP4	APOO
	YIF1A		C20orf27	TRIM41
	PACSIN3		TXNL4A	NOP2
	MYL9		POLR2L	POLR1A
	PRR5-ARHGAP8		KAT2A	RPS6KA5
	UNC119		SH3GL1	PRDX1
	SSH3		SMYD3	LRRC61
	MAP1LC3B2		AUP1	BIRC5
	SOX8		ALG6	HACD2
	HABP4		QSER1	CLUAP1
	DNMT3A		GYS1	ITCH
	NKX3-1		SUMF2	RSL24D1
	METTL26		NKIRAS2	MIIP
	PARD6A		TMTC2	IER5
	GOLGA2		PCSK7	GLYCTK
	RFNG		LMCD1	RPL27A
	WNK2		ZBTB24	BFAR
	MYO18A		SUMF1	YTHDC1
	KLHL35		XYLB	PSIP1
	TAZ		SMG5	FUBP1
	ZNF746		CORO1C	RTEL1
	SLC38A7		SH2B1	PTCD3
	POMGNT2		NIPSNAP3A	FOCAD
	GALNT1		TIMELESS	PPP1R8
	SYT7		HNRNPAB	HNRNPA0
	SPRY1		B4GALT5	AZIN1
	DENND5B		CNEP1R1	MOSPD2
	DFFB		SIRT3	YBX1
	SLC46A1		TMEM9B	TOGARAM1
	SLC22A18AS		PRUNE1	ASPH
	KDELR3		ZNF182	FAM120C
	MYORG		ANAPC16	THOC2
	CARD10		POLR2C	ZFP36L1
	KLK5		DOK4	STK33
	COLGALT1		CCNJL	RTL5
	HIP1		MAP2K2	KCNH3
	PRF1		CCDC71	YTHDF2
	KAZALD1		CTPS1	ERV3-1-ZNF117
	OGFR		FOXJ2	CCT6A
	PTPRU		ARHGEF28	TRIM2
	RAB26		ZNF131	RTN4
	UBL4A		BBOF1	ST6GAL1
	ODF3B		ARHGAP44	DNAJA4
	BCL3		DCTD	PATZ1
	ADCY3		SPATS2	VDAC2
	MEX3D		PUDP	KCTD7
	GPC1		UQCC2	ZBTB10
	CD276		MRPS6	ZNF512
	GPS1		SLC5A3	ZNF701
	PPM1F		PI4K2B	ORC2
	KISS1R		FADS1	ING3
	ADCY7		BOK	MTIF3
	TWIST1		CCDC9	CHMP4A
	TC2N		TLK2	DDX3X
	MAN1C1		UNC5B	CHM
	SLC2A4RG		HTRA2	SFPQ
	TMTC4		DONSON	WDR47
	TNS2		INTS11	MDH1
	RGS19		CFAP206	ATP6V1B2
	PACS2		FAM110C	ZSCAN16
	CCND3		PPFIA1	MRPL22
	SLC25A1		NCLN	BAG2
	TOX2		PLEKHF1	RPL24
	ORAI3		SMIM11B	ELOVL1
	UPK3B		RELA	TMA16
	RIMKLA		GET4	PHF21A
	TRPT1		OPN3	MRFAP1
	PGGHG		PLEKHG2	TIMM44
	PITPNM3		ASCC1	CD109
	TP53I13		ADSL	TRMT44
	KIRREL1		DLG4	CSTF3
	LRRC3		AFAP1	FAM111B
	B4GALNT4		MAPK3	FAM189B
	UCKL1		RNF214	SRGAP2C
	F10		WASHC2A	LRRC37A3
	DDN		C15orf39	TICRR
	LAMA5		P4HB	CEP57
	SEMA3B		PTDSS2	NMRAL1
	ARHGEF19		C11orf95	RNF144B
	NES		RBM17	TEX45
	ABCA2		TULP3	FANCB
	COL6A2		PXYLP1	TOE1
	DTX4		MRAP2	FARP2
	GAS6		SEMA7A	PRPSAP2
	STX4		BRF2	IPO11
	EMC3		DEAF1	FBXO16
	PPP2R1A		DMTN	TMEM144
	CEMIP		NR6A1	FBXO32
	CERK		CUL7	HMG20B
	FAM217B		PPTC7	TAGLN2
	CA2		RAB12	MT1A
	MELTF		ANKRD52	DMKN
	OTUB2		ZNF507	KANSL2
	FXYD3		MSN	KIAA0513
	NTMT1		RNF216	NFRKB
	CD47		SH2D3A	CCDC9
	SSC4D		MAP3K5	TMCO1
	RFX1		KCNN4	SETDB1
	ENKD1		PTMA	NUF2
	SSBP3		PPP1R16A	DEPTOR
	CRABP2		TXN	SLC25A21
	TMEM151A		SEC61A2	DNAJB11
	NEK5		CEMIP	ALDH16A1
	JCAD		CPTP	SASH1
	INAFM2		NF2	OARD1
	IGFBP6		RBFOX2	RPL6
	EPPK1		MTM1	EPCAM
	ADGRB2		CHRNA7	HIP1R
	PRKCQ		PTPRJ	UTP11
	RPS6KL1		RUVBL2	COX17
	ALDH1A3		CCDC59	FUCA2
	MAST3		CTNNAL1	CHMP1B
	NPW		ZFR	LBHD1
	KCNC4		RBM6	UQCC3
	B3GNT9		ZDHHC24	ZFP36
	DMPK		FAAP20	TNIK
	ARF5		GSR	EMG1
	DPP4		METTL25	SLC16A7
	VPS37D		SCAPER	ZHX2
	BCL11A		EFR3A	TBRG4
	SULT1A2		CHMP6	ANKZF1
	APLP1		RNF11	NAF1
	HYAL2		YWHAG	CBX4
	SLC9A3R2		CC2D1B	PARD6B
	RTN4RL1		GPX4	IL17RC
	SLC12A8		CLASRP	ARL6IP1
	TERT		GSDME	MCM5
	VGF		GPD2	PSPH
	TSEN54		MMP17	ZNF91
	DNER		FASTK	NUDC
	NATD1		SPATA33	SF3B4
	NRTN		PCSK6	KIF4B
	SHROOM2		FOXK2	QPCTL
	RASA4		MAP2K4	ZBTB8OS
	MDK		TRAPPC1	CUTC
	TMEM120A		DMPK	FOXD3
	DDX59		CCDC149	PPP6R1
	ZNF704		ATP5PD	PRPS1
	MRPL21		GJC1	MAOB
	LRFN1		AKAP8	ZNF518A
	MEGF11		PIK3R1	HSD17B12
	IGHMBP2		ZMIZ2	NFE2L1
	FHOD3		ZMYM5	PCBD2
	YPEL2		STX1A	THUMPD3
	GPR161		AKAP13	MPST
	ABCA3		GOLGA3	HSPA9
	GRAMD4		ZNF180	SOX12
	SPEG		ADCK1	UBXN8
	NOL4L		KCTD2	CEMIP
	REPS2		CBX8	AIP
	TTC9		ATP6V0D1	LSM8
	TMEM59L		PPP5D1	PRR11
	PITPNM1		MAP3K21	PLK4
	EPN1		DLG1	HNRNPH1
	SLCO3A1		TMCO3	DOCK6
	THBS1		SSX2IP	CCAR1
	KREMEN1		FXN	CWF19L1
	ANKRD13B		PHF12	AKR1A1
	VEZF1		PAQR7	PLAT
	DBP		CARD10	C14orf132
	TNFRSF18		ZNF783	UBE2C
	ZNF467		TBC1D10A	IFT140
	FAM210B		BCORL1	NOP53
	FGFBP1		PHF2	RPRD2
	CELSR3		MAP2K7	LGALS3BP
	FGF18		CERS6	C11orf58
	KLK6		SERPINE2	CCNYL1
	CYP1A1		ZFP41	MDM2
	NAGLU		PPP6R2	COX15
	KIFC2		GALNS	MEPCE
	ADIRF		PAPSS1	HAPLN3
	BCAM		MAN1C1	RAD21
	SPNS2		FBXL2	WDR76
	GDPD3		TMEM198	TRERF1
	STOML1		DHRS3	ZKSCAN1
	RASGEF1A		RAB15	ZSCAN30
	PLEKHA7		CMTM8	RPL23A
	MVP		CHRAC1	ECT2
	MTRNR2L2		SLC27A4	FBL
	PELI3		FPGS	COMMD4
	TTLL3		PKN3	CERS5
	PLAU		FCHSD2	DRC3
	BDNF		STUB1	AAAS
	TSC22D1		TMEM64	CD81
	CDKN1C		SHISA4	LRRC23
	RAC3		ADIRF	MRPS31
	S100A4		THEM6	MAPK8
	TSPAN4		KDM4B	KLHL28
	PDGFA		MAP4K3	DDX47
	CAMK4		CTBP1	AKAP12
	THRA		RHOF	LUC7L2
	PROM2		CARS2	EIF4A1
	COL18A1		EEF1A2	HEXIM2
	MEX3B		AKIRIN1	UBE2D3
	TJP3		HTT	PIEZO1
	SYNGR3		COA7	ANXA5
	WNT7B		AP4B1	RBBP4
	FBXO2		TIAM1	C4orf46
	NOTUM		BNIP3	NOP10
	CTDSPL		FAM168B	SUCO
	LRRC26		CKAP4	CRIP1
	FN3K		MAN2A1	UBAC2
	FBXO44		SDHAF1	DET1
	RASA4B		CCNI	KNTC1
	DLG4		CCSAP	GATAD2B
	MICAL3		TRIP10	F2RL1
	SPIRE2		TBC1D14	ERCC1
	CC2D2A		ARHGEF3	MAVS
	TMC8		ABHD17C	NRDC
	METRN		CHPF	EEF1AKMT1
	ABCA7		TMEM129	ZNF22
	RTBDN		BCL7B	CCNB1
	GLT8D1		EIF2D	YAP1
	TBXA2R		GOLGA2	RANBP6
	FSTL3		SMIM7	NIT1
	KLK10		MEF2A	CRAMP1
	SCUBE1		MRM1	NUP153
	EPN3		MSX1	HNRNPR
	CYP27B1		RHOT2	EGR1
	ARRDC4		ZFP1	TMEM209
	CHD3		ERAP1	LZTFL1
	GNPTG		TRIP6	NCL
	SAMD11		KANK1	SYAP1
	CNTNAP1		CCDC57	VCAN
	PBX1		UBE2G2	ZNF92
	HLA-DMA		UBA2	CEBPG
	INPP4B		DCUN1D2	DYNLL2
	CUEDC1		TOP3B	PRPF3
	TRHDE		CEP19	PPCDC
	KCNH2		THBS1	TAF11
	PTPRH		DIDO1	KIF2C
	STEAP3		GNAI1	EXOC6B
	TSR3		CCNG1	PTMA
	MAML2		MLST8	RBM12
	UNC13A		MAFK	IRF2BP2
	SLC6A20		SHARPIN	CASP3
	FAM214A		PIGX	PPIL3
	PLXND1		SELENOS	SLC35G2
	TAGLN2		COPRS	GABPB2
	ZNF232		BCL9L	GRPEL2
	MGLL		CALM3	EXPH5
	MLX		SEMA3D	GPATCH3
	DIXDC1		NMT2	SIX5
	CRACR2B		UBE2J2	FKBP1B
	APOBEC3H		GRK2	HAT1
	POF1B		ABCD1	CAAP1
	PNPLA6		LIMK1	ARID5B
	ELMO2		PDK3	CEP41
	SSTR5		KCTD6	COIL
	RELB		MVD	EHBP1
	NBL1		LZTS2	ZSCAN31
	MAPK11		CLIP2	VWA5A
	PACSIN2		ECE1	SAMD13
	SULT1A1		SDHB	HERPUD1
	PIK3CD		ZDHHC1	PFDN2
	MAP3K12		BAZ1B	NOSIP
	VIPR1		MICAL2	SMG9
	MTHFR		SLC30A1	PHC2
	AMOT		INTS5	TUFT1
	SUSD2		B3GLCT	IRX5
	CYSRT1		CDK18	PRIMPOL
	CPT1B		ADA	SRRM2
	RHBDF1		MAP3K6	HYPK
	PPARA		ACSF3	COQ3
	RAB3A		PRSS22	SLC36A4
	PTCH1		IPPK	KIF23
	NOS3		B3GNT4	PFKP
	SATB1		PFKFB3	PHKA1
	TLR1		STRN4	AP2S1
	RXRA		MFSD5	HELLS
	KRT15		CERS4	NFIL3
	MMRN2		MAP3K9	POLR2K
	FES		UBQLN4	RPS15
	S100A5		SPR	ILVBL
	ACADVL		ZNF639	ATP1B3
	JAZF1		PTPN2	PIM1
	TNNC1		GRSF1	SZRD1
	EPB41L1		USF2	DNAJA1
	MAST4		SAPCD2	ETFDH
	ADGRF1		WDR45B	SRMS
	FBLIM1		NAA10	CRBN
	LIF		PLP2	GTPBP2
	CAPN6		FAM222B	IREB2
	BTN3A3		TOR3A	NACA
	SCG2		PRICKLE4	FLNB
	ITGBL1		SLC2A6	SUB1
	LYST		FKRP	TST
	NCAM1		HPCAL1	PIK3C2B
	PALM3		GRAMD1C	SMTN
	TCEA3		BCL7C	KRBOX4
	PTPN6		CEP57L1	MED4
	APOBEC3A		SPTLC2	STAG2
	BTBD10		IKBKG	TCERG1
	ELOF1		MC1R	NUP85
	RGPD4		PARP12	SWAP70
	SLC29A4		WNT7B	FUNDC1
	LGALS9		PPP2R5B	EFCAB2
	VOPP1		FAM214A	CKAP2
	CBFA2T2		ZNF318	MTF2
	PITPNM2		MARVELD3	LTN1
	TULP4		MECP2	SLX1A
	BCAS1		CDCA4	SPRED2
	PLA2G4B		MNX1	ARL17A
	AKR7A3		MROH6	SYF2
	AKR7L		HYAL2	CEP68
	RGS12		WDR45	FAM118A
	UBE2F		RALB	MET
	ARHGEF38		SGTA	ANAPC15
	HS6ST2		NCK2	HDAC1
	RIMBP3C		CDC42EP1	ARL17B
	SLC5A5		HEMK1	COPS7A
	SNCG		CHADL	MEX3C
	MAPRE2		TRAPPC9	BOLA2B
	CYP26B1		SESTD1	FGF2
	EHF		CYTH1	DDX6
	PLAGL1		GEMIN7	FAM117A
	NECTIN4		ISYNA1	NUCKS1
	SLC15A1		TBL2	IFI35
			PCLO	STAM
			C3orf52	RBP1
			FZD5	CITED4
			SDF4	DKC1
			FIBCD1	CKLF
			KLF3	CKLF-CMTM1
			ARHGAP21	TTC1
			METTL27	GADD45B
			TMEM52	TMSB15B
			CISD3	IDH1
			RIPOR1	PPARD
			YY1	PTGES3
			SLCO4A1	ZNF827
			FAM160B1	CEP95
			KCNG1	COX6B2
			SLC49A3	FRAS1
			ZNF518B	SNRPG
			GPSM1	AASDH
			ZNF526	EIF5
			CHSY3	PDP1
			BRF1	RASGRP1
			PRRX2	WDR36
			IFNGR2	ARL4A
			FAH	ZNF845
			TMEM169	RBM39
			PECR	RAB11B
			CLBA1	ZNRF3
			SQLE	HDAC5
			CDR2L	POU2F1
			CDON	CDKN1B
			FAM47E-STBD1	TOM1L2
			NEK5	MLLT3
			EEF1B2	ABRACL
			TERF2	SUMO3
			DCBLD1	SLC4A7
			ELF2	AURKB
			SLC35B2	NSRP1
			SCARB2	SLX1B
			SHISA8	SETD5
			ADGRF1	RPS23
			DCAF15	ETV7
			ATL3	HOXB6
			PIGV	RPS3
			TRPM4	KHDC4
			ZNF778	EXOC7
			VIM	ETFBKMT
			BRMS1	SRSF5
			NT5DC2	HMGB2
			PATZ1	KDM6A
			TKT	CBR4
			IDUA	BNIP2
			ZDHHC12	CREB1
			CHRNB4	TEX10
			PPM1F	CFAP73
			SRM	RPL10
			PLCE1	ZNF525
			ARSA	NT5C
			B4GALT7	API5
			LRRC59	MAD2L1BP
			KMT2B	NFAT5
			VAV2	DIS3
			ST3GAL2	GIN1
			B3GALT6	TIPARP
			SAC3D1	SOAT1
			DTX4	UBE2T
			CST3	ADGRG1
			TAGLN2	ALDOC
			ST6GALNAC2	HNRNPUL1
			CDK10	GADD45A
			OTUD1	CEP55
			MIF	ACACA
			ITPK1	TWF2
			JRK	BOLA2
			AIF1L	BOLA2-SMG1P6
			TYMSOS	SNRPD2
			RALGDS	CBX3
			SLC38A10	SKA2
			CYC1	RAB5A
			MYO5B	PFDN5
			SLC27A5	RIPK1
			MLF2	ZNF207
			DDOST	ZCWPW1
			TCF3	DUSP4
			CYHR1	ZNF714
			PITX1	TMPO
			ADD1	PIP5K1A
			MYRF	SLC3A2
			NUP210	BEX2
			AFDN	MTO1
			MMD	ASF1A
			LRMDA	PAIP2
			UCKL1	PPIP5K2
			B4GALNT1	CYP4F11
			SLC25A5	RCN1
			KCMF1	DYNLT1
			PACS1	UBA1
			SLC27A6	COX20
			CAB39	RPL35A
			PXDC1	DDX17
			TANC1	HNRNPA3
			AGRN	KRT222
			CHCHD3	LIX1L
			BMP1	DPYSL2
			TCAF1	PIBF1
			ADGRB2	TADA2A
			ZNF512B	PQBP1
			MIB2	KDM4A
			FLT3LG	TSPYL2
			DIRAS1	PTBP1
			BMP8A	UBR5
			KCNJ12	NIF3L1
			ANP32C	GINS4
			RPLP2	SLC43A3
			SMIM20	PCDHGA9
			MAST2	BPTF
			TYMS	FUZ
			TESK1	TIMM17B
			TLE2	NMT1
			PLXNB2	RACGAP1
			CRIP1	SINHCAF
			PYCR2	SNRPA
			SRSF1	ZMYM2
			CAPNS1	GPR19
			AKAP1	HOXA9
			METTL5	MKKS
			HGS	PMF1
			CDC42EP2	PMF1-BGLAP
			ORAI1	RPL9
			PLEKHN1	YIPF4
			SLIT2	ATP6AP1L
			STK39	HAUS5
			SVBP	LIAS
			ERMAP	YEATS4
			PLCG1	G3BP1
			PLAGL2	PAFAH2
			CEP170	CARHSP1
			DUS1L	MRC2
			CSPG4	APLP2
			CAMK2D	PMAIP1
			TMEM250	CCDC28A
			RTN4RL1	ZFAND5
			CERCAM	KNSTRN
			POFUT1	CHD6
			NENF	BAMBI
			BCAP31	PPWD1
			FAM83G	OSER1
			FBXO31	GLS
			TGFBRAP1	CYSRT1
			SLC22A23	CENPK
			TP53I13	NSMCE1
			OGFRL1	RPL37
			KBTBD11	MRPS16
			C1QTNF6	RAET1G
			DIXDC1	PKIB
			C1orf159	ATP5IF1
			STIM1	DTL
			ASAP2	KHNYN
			NARF	DCAKD
			DRG1	ZNF766
			KCTD12	RPL36
			POM121	SPOCK3
			PRELID3A	BCAS2
			ANKRD46	DDX39A
			NUAK2	BCLAF1
			USH1C	RPS25
			RIMBP3B	CD24
			TSPAN17	FLAD1
			KLF16	CETN3
			PTPN18	FAM200B
			RNF149	DAGLB
			LOXL4	MBD3
			GPR157	COX7B
			NFKBIE	FOXP1
			STK17A	PCBP1
			TCF20	AFAP1L1
			FLYWCH2	OSR1
			TRAPPC2L	CHD2
			EFCAB14	MTAP
			TSPAN33	MTHFD1L
			ARC	RPS2
			ELFN2	FTH1
			C2CD2	SEPHS1
			PPP1R35	WARS2
			WDTC1	BZW1
			TACC3	EXOSC8
			TEAD4	PFDN1
			KIAA1841	PRIM1
			FBXL6	GLRX
			TMEM120B	PIH1D1
			SSBP3	ZNF143
			NME2	RACK1
			MZT2A	KAT7
			TTYH3	NUP35
			RAB2A	VHL
			UVSSA	ERI1
			TFEB	PNN
			ARF1	PLA2G6
			RHBDF2	SERINC1
			NAAA	RNF139
			MLXIPL	MKRN3
			SFXN1	COQ7
			ZNF70	MAGEA3
			ZFYVE21	MAGED2
			HRAS	L3MBTL3
			GPR173	BUB3
			TUBB3	MORF4L1
			APLP1	TROAP
			SRPK1	EIF5A
			GAA	PPP1R15B
			KIF26A	WNT3A
			AP2M1	MAP7
			FOXF1	KLF4
			WIPF3	KIF5A
			KPNA1	SUMO2
			HSDL1	PTTG1
			ZNF888	NR2F2
			NDUFS7	FOSB
			RFNG	WDR6
			SLC35F3	EMC4
			SPEN	PJA2
			ADAP2	CARM1
			DYNC2H1	CBX5
			BAG5	GDAP1
			MROH1	CCND1
			EFHD2	NPTN
			SEMA4F	PPP1CC
			FAM102B	HK2
			RNF208	PPP4R3A
			RNF144A	SNX25
			SCARB1	TRAPPC4
			MAN2B2	KDM3A
			BMP2K	ERP29
			PFKFB4	STMN1
			CSK	PDK4
			S1PR5	XBP1
			KLC3	SMC4
			TNRC18	MORF4L2
			BOLA3	KRT18
			LTBR	TGFB1I1
			RASSF5	GOT1
			C19orf12	ZNF773
			LHFPL2	SPOCD1
			YIF1A	RPS16
			RAD23B	ARHGAP18
			GMEB1	TMEM116
			ADCY9	RRN3
			MGMT	IQCG
			CDK9	PARM1
			TJP3	ZNF585B
			IL18R1	PAIP2B
			KLK6	NCAPD2
			ARMC2	MAGOHB
			AP5B1	MCAM
			RPS6KA1	TMEM94
			ATXN7L3	ING4
			C19orf25	COL12A1
			HMGA1	RCOR1
			AP5S1	ACSL5
			CYP4F11	NOP58
			JPH1	DDX11
			PSMB2	TERT
			ANO9	SLC43A1
			RILP	ATF6
			PDGFC	RPP25
			SLC52A2	CPOX
			ARL8A	HAUS1
			OSBPL2	ERRFI1
			ANKRD13D	THAP9
			TINAGL1	ATG4A
			CHD4	DAZAP2
			TMEM25	USP53
			DGKE	CNIH4
			ARL16	MYC
			TRAF6	SREBF1
			TGFB1I1	RPS11
			NCKIPSD	XRCC5
			MRPL36	MAPK3
			GRHPR	GPR155
			DNAJB2	POLR2J3
			SH2B2	ETV1
			GFPT1	FAM3C
			OGFR	RPL22L1
			CAPN5	IFT80
			VAPB	KLF6
			BCR	MCM6
			RNF130	LMO4
			ZBTB47	ZNF414
			TPST2	HNRNPL
			TBC1D4	TCF7L2
			ARHGEF40	POLR2J2
			TAZ	TUBB6
			BCAS4	DLGAP5
			PSEN2	BCL11B
			ZNF787	FBXO8
			EIF2AK4	HR
			PIP5K1C	ARF6
			RCAN3	PFAS
			APEH	REPS2
			SMARCA4	MRFAP1L1
			TBCD	ENO1
			GPS1	ZNF85
			SND1	HSD3B7
			SESN1	HMG20A
			USP22	WRAP53
			SLC29A2	LYSMD4
			WNT3A	NGDN
			RIBC2	CWC22
			EMD	CEP44
			CLMN	RAN
			SLC25A39	PARS2
			PTPDC1	BICRAL
			SBF1	ESPL1
			DFFB	SLX4IP
			ZNF7	SLC2A12
			CALB2	MAGT1
			STN1	LDHB
			DISP2	WDR33
			CDK5R1	MID1IP1
			CACNA1H	KDM2B
			RFX1	UBB
			KIAA1522	FNBP4
			SOX18	DNASE2
			HIP1	CENPE
			CNTNAP1	ZC3H4
			EZR	NDUFS5
			RILPL1	E2F3
			AP3M2	CKS1B
			SLC22A18AS	ETV5
			CEP170B	IP6K2
			ZNF696	BBS10
			FAR1	PSMD10
			SLC46A1	RBM8A
			NEK3	OAZ1
			CEP104	TGIF1
			VPS37D	ARHGAP17
			TSPO	RND1
			DAZAP1	ANP32B
			CAST	PYROXD1
			ACVR1C	PRRC2B
			VCPKMT	IL4I1
			HLA-DMA	NUP62
			CHAF1B	PADI2
			SYNGR3	RLIM
			RTN4R	RINL
			LGR4	RPS10
			SLC35F6	RPS10-NUDT3
			ASPHD1	PIN4
			ASPHD2	ZNF350
			PDP2	MAP1B
			DPY19L1	ZNF281
			MIB1	TRIM38
			SYT17	EIF1
			RELL2	ZNF114
			MRGBP	E2F2
			ADGRA2	VPS72
			GNB1	C6orf226
			MICAL3	CCNB2
			SLC22A18	PRRT1
			IL17RD	COMMD10
			TANC2	RPL38
			TARBP1	RPL23
			DIP2C	TPX2
			CTSZ	ZNF566
			CALU	C19orf54
			FMNL3	SLC33A1
			DUSP22	CDC6
			SLC25A1	DNTTIP2
			ANKRD33B	EIF4E
			ANO5	CBWD2
			P2RX5	SNRPE
			ESYT2	FRA10AC1
			GALNT18	SLC38A2
			BAK1	TSEN15
			SMIM11A	IFI6
			ZNF280B	IGF2BP3
			CYTH3	COX7C
			FAM124A	LMO7
			SAT2	TMBIM6
			NATD1	TNRC6B
			DENND1A	GPER1
			NUAK1	ZBED3
			CLDN23	EIF2S2
			GCC1	TXNRD1
			CSNK1G2	MYL6
			LYPLA1	ABHD10
			FAM20B	HNRNPU
			TMEM200B	SYNCRIP
			PTGFRN	RPL34
			RAI1	OCIAD1
			CEBPA	POR
			B4GALT1	DUSP6
			RPS21	GOLPH3L
			POPDC3	DBF4B
			PANO1	TNFRSF10B
			ENHO	REEP4
			PAK1	AP2B1
			MALL	SLC11A2
			ROR1	ZMYND8
			NEMP2	PCBP2
			CCND3	ANP32E
			FAM20C	CNTNAP3
			HECTD3	ATXN7L3B
			BRI3	PALLD
			RASSF4	ARHGEF35
			SLC25A4	SPICE1
			FAM114A1	SMU1
			DPP7	UBALD2
			PLPP2	ANXA1
			CPNE7	VCPIP1
			KATNAL1	DKK1
			ZNF775	XPO1
			ARFRP1	POLD3
			APOBEC3F	SPIDR
			LMF2	RAB6C
			CPEB2	PMM1
			RNF166	APOLD1
			CD63	RPL31
			AGAP3	PCDHGA5
			INSR	AK2
			KLHL22	YJU2
			LHPP	C5orf34
			LDLR	OGT
			NIN	MFSD4A
			ABCC4	EDNRA
			CTU2	DPYSL4
			NCAPH2	HMGA2
			THOP1	EIF4B
			PTPRH	GCNT3
			FAM83H	ATF4
			EMP3	MAP1LC3B
			TNFAIP2	N4BP2L2
			GLT8D1	SRGAP2B
			DHX32	PYCR1
			CTDSP1	KIF11
			NPAS2	TRUB1
			ABLIM3	ING1
			EML5	BTN3A1
			CRABP2	PRNP
			RAB6B	ZNF711
			VWA1	S100A14
			PSME1	ILF3
			HOXA13	CNOT2
			ATXN10	PSPC1
			GRINA	MDN1
			TSEN54	CCNB3
			ICMT	SLC39A10
			TRAPPC10	ACSM3
			SPNS2	PSAT1
			NTMT1	LNX1
			PTP4A3	CAV1
			SELENON	PREPL
			PLD1	TSPYL1
			CHID1	LAT2
			BRD2	RPL37A
			NAA40	C8orf44-SGK3
			NUDT14	RPS6
			GATA2	DLG4
			ZNF514	PROSER3
			DAG1	SAP30
			B3GNTL1	CHTOP
			YKT6	CCNL1
			IDH2	TP53
			RAD9A	MED18
			CAMSAP1	BRIP1
			HDAC3	SERPINI1
			C7orf50	AP3S1
			RNF187	RMI1
			ZNF276	LMBRD1
			MTA3	NASP
			RASSF1	ASPM
			ROGDI	SEPHS2
			FAM89A	HEXIM1
			TBC1D9B	ACTN4
			ZBTB7A	HNRNPK
			MXRA7	PDGFRL
			URI1	RTN2
[truncated: 608 more rows]

## Sheet: Table S2
Table S2. TDRD3 binding genes by ChIP-seq
TSS (20)	exon (9)	Intron (6)	TES (23)
C16orf91	CCDC85B	SCAND1	CCDC85B
SRSF4	C11orf68	DDIT4	DDIT4
DCAF8	SAC3D1	DXO	EGR1
TECPR1	CHAC1	ACSL5	AREG
MEN1	CBX4	RPS27	FOSL1
RPS6KC1	SLC44A4	MSC	ACTG1
FAM193A	ZNF19		MIDN
SMIM6	KRT40		ABCB9
TRMU	UBE2L6		BMP4
LNX1-AS2			TRIB3
KLC3			CHAC1
TLN2			CCDC27
HOXB2			FAM43A
SNORD33			RASL12
HKDC1			MKNK2
KIF17			UPP1
B3GNT6			UBASH3A
ALOX12B			STMN2
TTC39A-AS1			NPHP1
SLC51B			ANO1
			TBC1D20
			MALAT1
			C20orf203

## Sheet: Table S3
Table S3. Differentially expressed genes (DEGs) in TOP3B-KO.
RNA-seq (884)		Ribo-seq (550)						Fig.3e Heatmap
down (529)	up (355)	down (260)	up (290)		Down				Up
AKAP17A	NDRG4	HNF4A	TIAM1		Group 1 (155)	Group 2 (57)	Group 3 (22)	Group 4 (26)	Group 1 (151)	Group 2 (38)	Group 3 (71)	Group 4 (30)
MFSD4A	GGT1	ANGPT2	GGT1		RAB27B	KRT6A	ANGPT2	HNF4A	TIAM1	GGT1	MSI1	PARP16
HNF4A	RASGRF1	TACSTD2	RASGRF1		CPM	RHOU	ZNF426	TACSTD2	PAOX	RASGRF1	KCNC4	FHOD3
SPNS3	ZNF772	ZNF426	PAOX		STX11	AREG	KRT7	CD33	CHRD	ADGRA2	PCYOX1L	DRAXIN
TACSTD2	SLC1A4	CD33	CHRD		FGFR1	GRHL1	WNT16	FN1	GNAS	PDE4B	PPM1F	MOSMO
CD33	SLC44A5	RAB27B	GNAS		SLC7A2	PER2	ZNF350	ACSL5	DTNA	COL12A1	NT5DC2	MAP4K5
FN1	ADGRA2	FN1	DTNA		MAFG	GNAL	VCAN	SMAD7	IGF2	ANO1	SIRPA	STK39
KRT6A	GNG10	KRT7	IGF2		PIK3R5	CRYM	ZNF83	HAS3	WASF3	PLEKHB1	LAMA5	ETS2
ACSL5	RGCC	KRT6A	ADGRA2		SLC30A4	NPNT	FGF2	CDIP1	CADM4	FGF19	COL6A2	LHPP
SMAD7	CD24	WNT16	MSI1		LAMA3	AGRN	PRDM1	ICAM1	E2F7	KIAA0040	DNAJB2	PAM
HAS3	LDLRAP1	ACSL5	WASF3		DEPDC7	RASD2	TRPM6	PPARG	KCTD17	RHOBTB3	SLC25A29	LGALS9
RHOU	CDK14	CPM	CADM4		PLEK2	GPR3	JMJD1C	NR2F2	HTR1D	NR2F1	GNB1	KLF2
CDIP1	SYNC	SMAD7	PDE4B		BRWD1	PER1	ZNF845	SGK1	PAX2	VPS36	CHID1	ANK1
GAS7	TMOD2	ZNF350	KCNC4		CCDC122	PIR	ARHGAP40	NLRP4	INPP1	TNIK	TMEM132A	PPM1H
ICAM1	PDE4B	VCAN	E2F7		GREB1L	RREB1	ARL14EPL	ZHX2	STK11	TMEM165	G6PD	DENND5B
DUSP9	VIM	ZNF83	KCTD17		COBLL1	WNK2	TUBGCP5	MSX2	SLC1A1	SYT1	VAMP2	PAPSS1
PPARG	GLI2	HAS3	PCYOX1L		NAV2	KIAA0100	KBTBD8	KLF4	PI4KA	COA5	AXIN2	ALDH1A3
SGPP2	CYP2U1	RHOU	PPM1F		LRRC73	STK10	CDRT1	HMOX1	SMPD2	DUSP6	SYNGR3	CA11
NR2F2	PRSS23	CDIP1	HTR1D		MAP3K4	MBOAT1	PTGER4	AFAP1L1	MRC2	PDGFC	GLI4	RTBDN
OSR1	COL12A1	FGF2	COL12A1		AGFG1	GATA2	STK17B	ARHGAP26	SPATA2	MAN1A1	LTBP4	CTSH
SYTL3	ZNF85	ICAM1	NT5DC2		ACVR1C	BLMH	SAMD9	ARL4A	EGFR	FRMD5	PSME1	DNAJC12
AREG	ANO1	PPARG	ANO1		HCFC2	MTSS1	MAGEA2B	MYO15B	PPIL6	PPFIBP1	NUAK1	BDNF
SERTAD3	PARD3	NR2F2	PAX2		SEMA3D	PDE2A	STOX2	COL17A1	ARHGAP29	BCKDHA	NUCB1	SUSD2
BSPRY	PDGFRL	AREG	INPP1		TIPRL	WSB2		AGPAT4	AMOTL2	C1RL	TRAPPC12	CEMIP
MYZAP	PARP16	STX11	STK11		ANKRD13A	CCDC69		PLEKHA6	FAT1	CD44	BAX	FN3K
SGK1	TMEFF1	FGFR1	SLC1A1		SGO2	SBF1		ANXA10	BACE1	ARHGAP18	ZNF599	SLC6A20
GRHL1	AIG1	PRDM1	PARP16		STEAP1B	SLC45A1		SATB2	PCNX2	JAG1	ZNF341	TNNC1
NLRP4	PLPPR4	SLC7A2	SIRPA		SLC4A7	TIMM17B			TP73	APOBEC3C	TMEM25	TCEA3
PAOX	MYB	TRPM6	LAMA5		SYN2	DLX2			GSTM4	TNFRSF6B	MKNK2	BTN3A3
PHOSPHO1	ABI2	SGK1	PI4KA		RBM24	KRT6B			USH1G	APOBEC3G	NOS3	ADGRF1
NPEPL1	PLEKHB1	GRHL1	SMPD2		RNF125	HSPB8			INPP5J	CYP24A1	RASA4B	SLC15A1
IRAK2	JAK1	JMJD1C	PLEKHB1		DGKA	TMEM62			OPLAH	SELENOP	TMEM104
NKD1	FHOD3	MAFG	FHOD3		SYNJ1	ZNF296			ACOT7	CASP4	SH2B1
TLX3	ENDOD1	NLRP4	MRC2		TET2	FRRS1			GBA2	GFY	CDK18
PER2	LRP11	PIK3R5	SPATA2		CEP76	TEF			USP46	KLRC2	KIAA0895L
GJB2	RRAGD	PER2	EGFR		TMEM107	ACAD11			TST	KLRC3	MTHFSD
ZHX2	ZNF100	ZNF845	PPIL6		NT5E	GALNT14			TTC38	SLC2A3	EHBP1L1
HLX	SIMC1	ZHX2	ARHGAP29		PTPDC1	IRX4			SRRM5	GPM6A	COL18A1
GNAL	EPB41	SLC30A4	AMOTL2		LAMC1	CCDC28B			LIN52	ACOX2	ATP8B3
LYPD3	SERPINE2	GNAL	FAT1		MOSPD1	OASL			SOGA1		MSLN
TIMP3	MLF1	LAMA3	BACE1		CCDC186	SMPDL3A			MEGF8		NES
ZNF324	GSDME	DEPDC7	PCNX2		KIAA1328	ELOA			NRGN		PTMS
RADIL	EPS8	CRYM	TP73		ZNF235	ECSIT			FAAH2		ADI1
BHLHA15	KIF5A	NPNT	GSTM4		UBE3A	PFAS			ZNF502		CST3
BCR	CREBRF	AGRN	USH1G		TRIM6	SDCBP2			CAP2		RAB26
WDR25	DRAXIN	PLEK2	DRAXIN		CD55	PEF1			FOXRED2		OSBPL7
JOSD1	MFSD6	BRWD1	MOSMO		HOOK3	NADK			H6PD		ARF5
CRYM	BBS12	CCDC122	INPP5J		GRIPAP1	TBCC			WWTR1		SCNN1A
RAB3IL1	FBXL2	MSX2	MAP4K5		ME1	PTK2B			HDGFL2		LRRC26
A4GALT	MOSMO	RASD2	OPLAH		DMXL2	DUSP7			MICU1		GLIS2
NPNT	ITM2B	GPR3	FGF19		ZSCAN30	FBXL18			SGSH		EPN1
ARHGEF37	PRRT1	KLF4	ACOT7		NOD2	CHPT1			LRP10		GCC1
ETS1	MAP4K5	HMOX1	KIAA0040		TPST2	ANGPTL4			FAHD2A		FBXO2
CHKA	CYFIP2	GREB1L	GBA2		CHRNA7	CD68			ZNF428		MELTF
EMILIN2	FGF19	PER1	USP46		LARP1B	SYCP3			NR2C2		BCAM
AGRN	GALNT12	COBLL1	RHOBTB3		MTMR9	PRR12			CORO1A		MDK
CRY2	ANXA4	PIR	TST		EIF2D	TRIML2			TMEM263		EHF
BHLHE40	KIAA0040	RREB1	COL6A2		NUP98	MGLL			SLC49A3		CRABP2
SOWAHB	MEX3A	ARHGAP40	DNAJB2		AMDHD1				E2F1		COASY
GAS2L1	PDE9A	WNK2	TTC38		PAG1				KMT5C		MTHFR
FLNC	FAM210B	NAV2	SRRM5		SLC35A1				AK2		CNTNAP1
GXYLT2	SLC35D2	LRRC73	LIN52		SLC5A5				CD82		CYP27B1
TMEM158	SNX7	MAP3K4	SOGA1		STEAP1				CD83		DMPK
SLC43A1	RHOBTB3	AFAP1L1	SLC25A29		AP4S1				CACNA2D2		SEMA3B
MSX2	TPGS2	KIAA0100	NR2F1		LIN9				TMEM198		KLK10
RASD2	RECK	AGFG1	GNB1		AVPI1				EMID1		INPP4B
MYBL2	CMTM8	ACVR1C	MEGF8		FGD6				CHPF		F10
GPR3	PTTG1IP	STK10	NRGN		CENPE				C3orf18		SNCG
SLC35E4	PDE11A	HCFC2	CHID1		GSTCD				PSIP1		DLG4
ABHD6	CMTM7	MBOAT1	FAAH2		GUF1				NTSR1		S100A4
FCRLB	SPG21	ARL14EPL	ZNF502		TAF13				CGREF1		CELSR3
STRIP2	SRD5A1	SEMA3D	CAP2		HAUS6				ZSCAN2		ABCA1
SNX8	AUH	GATA2	TMEM132A		RPGR				MAP3K3
KLF4	HSBP1	TIPRL	FOXRED2		EXOC8				LRRN2
HMOX1	TANK	ANKRD13A	STK39		TTC21B				SIPA1L1
PER1	CD58	SGO2	H6PD		ZNF559				ENO2
ATF3	BTF3L4	BLMH	WWTR1		GDPD1				FAM120AOS
AKR1C3	METTL9	STEAP1B	HDGFL2		AQR				MACROD1
TTC21A	SHOX2	SLC4A7	MICU1		TTN				TRIOBP
PIR	NR2F1	SYN2	SGSH		KDM5B				CYP4F3
SLC48A1	HPCAL4	RBM24	VPS36		CCDC138				CHRAC1
ALOXE3	ARNT2	ARHGAP26	LRP10		TANGO6				UBL5
RREB1	RNASEH2B	MTSS1	ETS2		ZNF597				LATS1
WNK2	CDK2AP2	ARL4A	FAHD2A		ERRFI1				CNPPD1
SCN1B	LIPT2	PDE2A	G6PD		WWC2				PLA2G6
AFAP1L1	TRIM44	RNF125	ZNF428		MPC2				JADE2
PTPRU	SMIM20	WSB2	NR2C2		CCDC14				TYSND1
KIAA0100	SEMA4G	MYO15B	CORO1A		COL4A5				SMTN
PNMA1	STK39	COL17A1	TMEM263		DOK1				BCL2L1
SARM1	PPA2	CCDC69	VAMP2		SEC22A				ANKRD26
DGKD	APOO	DGKA	AXIN2		CSTF3				ETV6
STK10	PHKA2	TUBGCP5	SYNGR3		TNKS2				B9D1
SLC36A1	ZNF251	SYNJ1	SLC49A3		ZNF267				TNFRSF21
GPD1	VPS36	KBTBD8	LHPP		TMUB2				TMEM159
PWP2	L3MBTL3	TET2	E2F1		UBA6				CCDC171
ZNF324B	ARG2	CEP76	TNIK		PGBD4				LSM7
SIPA1L3	IDH3G	TMEM107	KMT5C		INTS8				C16orf95
NAGS	ETS2	NT5E	PAM		ATF7IP2				AKT2
SULT2B1	SH3D19	SBF1	GLI4		CIP2A				MLF2
MBOAT1	ELOVL7	SLC45A1	TMEM165		MPZL3				COL6A1
ST3GAL4	TXNDC15	PTPDC1	LTBP4		TIGD1				RAB38
PPP2R5B	CCZ1	LAMC1	PSME1		IP6K1				NCAPD2
DACT3	DUSP22	TIMM17B	AK2		TMEM116				BRI3
TMEM53	KCNK1	DLX2	NUAK1		TMCC1				APBB3
GATA2	KIF5C	MOSPD1	CD82		SRBD1				TTC37
DOT1L	PHYKPL	KRT6B	NUCB1		NUDT12				TSTD1
DNM2	NME7	CDRT1	CD83		NGLY1				FAM199X
TMBIM1	TNS3	CCDC186	TRAPPC12		ANKIB1				DET1
TMCC2	PLPP5	KIAA1328	CACNA2D2		WNK1				PEX14
BLMH	ZNF596	HSPB8	TMEM198		YLPM1				TUBB4A
IL17RC	MTURN	TMEM62	EMID1		RPP30				TPD52L2
NFKBIB	LHPP	ZNF235	BAX		C21orf91				USP24
IL20RA	SPTLC2	UBE3A	CHPF		EIF2A				SCRN2
CCDC32	ABRACL	PTGER4	C3orf18		AP3S1				IRF2BPL
RAB24	MBTD1	TRIM6	PSIP1		KANK1				CALCRL
DHCR24	TSC22D1	CD55	NTSR1		RPL39				FBXL19
WWC1	TNIK	HOOK3	CGREF1		SLF2				ETV1
RFX1	TRAPPC2	GRIPAP1	ZNF599		MRPS15				COL9A3
ARHGAP26	PAM	ME1	SYT1		MFSD14A				GSN
PFKP	ICA1	ZNF296	ZSCAN2		ETFRF1				TNRC18
MTSS1	ANKLE2	DMXL2	MAP3K3		SPATA24				CIRBP
ARL4A	SLC41A3	ZSCAN30	LRRN2		HELB				ALKBH2
RAPGEFL1	ACYP2	NOD2	SIPA1L1		TMEM242				TGOLN2
PDE2A	TMEM165	TPST2	COA5		RNF223				RGS5
LRRC23	HMGN4	CHRNA7	ZNF341		TRMT10A				CUTA
EPN2	APP	LARP1B	ENO2		SPDL1				BTBD2
WSB2	EIF2AK1	MTMR9	FAM120AOS		TSEN2				CITED4
FAM193B	PLEKHA3	STK17B	MACROD1		COMMD1				KCTD3
MYO15B	DHTKD1	EIF2D	LGALS9		EMC3				MALL
COL17A1	ACBD7	NUP98	TRIOBP		SERINC5				CDK5RAP3
PPFIBP2	SPACA9	AMDHD1	CYP4F3		CHD8				SPARC
CCDC69	RBMS2	PAG1	CHRAC1		SMC3				KLHL30
NKX6-1	TCEANC	SLC35A1	UBL5		PLK3				BST2
EML1	SYT17	SLC5A5	LATS1		IFIH1				CEP290
STARD8	PIGP	STEAP1	CNPPD1		ID2				PRDX2
TTC7A	ADGRG6	AP4S1	PLA2G6		FEM1C				BCORL1
CACNA1G	AK9	LIN9	JADE2		ZNF598				GDF15
FLII	PLEKHH1	AVPI1	TMEM25		RAB9A				RAMP1
UAP1L1	MACO1	FGD6	MKNK2		POLE2				CYB5B
HSPA2	PTPRE	FRRS1	TYSND1		ORMDL1				PRSS8
PSMD3	PDE6D	CENPE	SMTN		STAM2				ARHGEF9
GTPBP2	PSTK	GSTCD	BCL2L1		PCF11				MAGED2
CFD	ARHGEF6	GUF1	ANKRD26		C6orf120				FAM43A
FAM83F	CEP41	TEF	ETV6		HMGA2				PEG10
DNAJC11	CDKN1B	TAF13	B9D1		TMEM138				IFI6
RIPK4	ABHD18	HAUS6	NOS3		CCDC15				L1CAM
CCNF	COX11	RPGR	TNFRSF21		F2RL1				C1R
WLS	BEX3	EXOC8	TMEM159		TOGARAM1				SEMA6B
CASZ1	C11orf45	TTC21B	DUSP6		CCNB3				CBFA2T3
SBF1	LYRM1	ACAD11	CCDC171		RGPD5				KRT32
SLC45A1	ADGRA3	ZNF559	LSM7		RBBP6				IFITM1
PANX2	SLC16A9	GDPD1	KLF2		JUNB				GRIN1
STPG1	HPF1	AQR	PDGFC		SLC52A3
PLXNA1	FGF18	GALNT14	RASA4B		LYST
KLHL18	BBS7	TTN	C16orf95		NOSTRIN
PLEKHM2	SYT1	IRX4	ANK1		RGPD8
TACC3	HOMEZ	KDM5B	MAN1A1
ATG2A	ZNHIT6	CCDC138	AKT2
AIFM2	RAB40B	TANGO6	PPM1H
TIMM17B	UST	CCDC28B	TMEM104
DLX2	PARVA	ZNF597	MLF2
ESRP2	SMIM19	ERRFI1	FRMD5
KRT6B	C20orf96	WWC2	COL6A1
ADCY6	CASD1	MPC2	RAB38
REXO1	TEX9	CCDC14	SH2B1
DNMT3B	ALDH5A1	COL4A5	NCAPD2
IL22RA1	COA5	DOK1	CDK18
AP3D1	CREG1	OASL	BRI3
OTUD5	CCDC91	SEC22A	APBB3
UBN1	TMLHE	CSTF3	KIAA0895L
DAPK3	LGALS9	SMPDL3A	TTC37
SIDT2	ARID5B	AGPAT4	TSTD1
HSPB8	DERL2	TNKS2	PPFIBP1
PRDM11	ASIC1	ELOA	MTHFSD
TMEM62	ARPC3	ZNF267	FAM199X
CTDP1	IFT52	TMUB2	DENND5B
PDRG1	SENP7	UBA6	DET1
TXNRD2	RPAIN	ECSIT	EHBP1L1
CCDC103	TMEM230	PGBD4	PEX14
GRHL3	NUB1	INTS8	TUBB4A
GFOD2	DNAJC25-GNG10	ATF7IP2	TPD52L2
TMEM38A	ERAP2	CIP2A	BCKDHA
APTX	VAMP4	MPZL3	USP24
MCOLN1	PPP1R3E	PFAS	COL18A1
TEAD4	MAMDC2	TIGD1	C1RL
EFTUD2	TLR3	IP6K1	SCRN2
EPAS1	ADAM22	TMEM116	IRF2BPL
CCDC189	CCZ1B	TMCC1	CALCRL
DENND4B	RNF130	SDCBP2	ATP8B3
ATP2C2	TMEM35B	SRBD1	FBXL19
GPR137	SH3BGRL	PEF1	ETV1
ACADS	ERV3-1-ZNF117	NUDT12	MSLN
MBD6	DUSP6	NGLY1	COL9A3
SYMPK	ACAA2	ANKIB1	GSN
RAB43	GNAZ	WNK1	PAPSS1
UBE2J2	KLF2	YLPM1	TNRC18
ZNF653	PDGFC	RPP30	CIRBP
BCL11A	RCN1	SAMD9	NES
NDOR1	ANK1	C21orf91	ALKBH2
IL4R	DSTN	EIF2A	TGOLN2
HOXA11	HIBCH	AP3S1	PTMS
ZNF296	DCAF10	NADK	RGS5
BAZ2A	IFT74	KANK1	CUTA
AOC2	UGT8	RPL39	ADI1
SPC24	CENPQ	SLF2	BTBD2
FANCC	MAN1A1	MRPS15	CITED4
ADAT3	PPM1H	MFSD14A	CST3
ABHD8	LAPTM4A	ETFRF1	RAB26
ANTXR2	ARL3	TBCC	KCTD3
COQ5	FRMD5	PTK2B	MALL
IRS1	REXO2	SPATA24	OSBPL7
MPV17L2	SNX16	HELB	ARF5
ARFGAP1	ITGAE	TMEM242	CDK5RAP3
ARHGEF1	ZNF33B	RNF223	ALDH1A3
ABCA7	MPC1	TRMT10A	SPARC
LDLR	PIGF	SPDL1	KLHL30
MFN2	RCN2	TSEN2	BST2
EIF4G1	ADPRHL1	DUSP7	CEP290
MDFI	CABLES2	COMMD1	PRDX2
GBX2	FAM220A	EMC3	BCORL1
CCDC88C	TOX2	SERINC5	GDF15
FEM1A	ZFHX2	CHD8	RAMP1
IRF2BP2	PPFIBP1	SMC3	CYB5B
NEURL4	PTGR2	PLK3	SCNN1A
SLCO3A1	CCNB1IP1	FBXL18	CD44
TSPAN14	TMEM143	IFIH1	ARHGAP18
FGGY	DENND5B	CHPT1	JAG1
MLXIP	TMED10	ID2	APOBEC3C
SPSB1	SAMD13	FEM1C	LRRC26
METAP1D	STK26	ZNF598	PRSS8
TIMM44	CAMKMT	RAB9A	ARHGEF9
SRC	SRSF8	POLE2	GLIS2
ZBTB17	DCAKD	ORMDL1	MAGED2
SRF	MRPL13	STAM2	EPN1
MAPK13	RPS27L	PCF11	GCC1
PEX26	ALG10	C6orf120	FBXO2
INF2	STARD3NL	HMGA2	MELTF
RRP8	NETO2	TMEM138	CA11
TLE1	PLA2G7	CCDC15	FAM43A
INCENP	NIPSNAP3A	F2RL1	BCAM
SIN3B	FAM149B1	ANGPTL4	MDK
TFAP2C	BCKDHA	TOGARAM1	EHF
PCSK9	IFITM2	CCNB3	PEG10
REXO4	C1RL	RGPD5	RTBDN
FRRS1	ACAD10	RBBP6	CRABP2
PRADC1	PCLAF	JUNB	IFI6
SHROOM1	BEX2	MAGEA2B	COASY
OSBP2	ABR	CD68	MTHFR
DHX16	PRAF2	SYCP3	CNTNAP1
CRB3	CKLF-CMTM1	PLEKHA6	TNFRSF6B
URB2	CAMK4	ANXA10	CYP27B1
SLC25A44	ADAMTS14	SATB2	APOBEC3G
GPR157	TSPAN3	PRR12	CTSH
TEF	USE1	TRIML2	L1CAM
SSBP4	CCNDBP1	MGLL	C1R
CRAT	ALG10B	SLC52A3	SEMA6B
TFEB	HS2ST1	LYST	DMPK
NFATC2IP	PAPSS1	NOSTRIN	DNAJC12
PPP1R35	PIN4	STOX2	BDNF
RRP1	ANTXR1	RGPD8	CYP24A1
ZNF696	SECISBP2		SELENOP
KDM2A	FKBP7		SUSD2
VPS16	ALDH3A2		CEMIP
UBXN11	THYN1		CASP4
SPATA33	LYPLAL1		SEMA3B
ZNF783	SLX4IP		FN3K
ALKBH4	ATP1B1		KLK10
RAP1GAP2	SYCE2		CBFA2T3
VPS18	MCCC2		INPP4B
GTF3C5	SGF29		F10
UPP1	SRPX		SLC6A20
ULK1	TRAPPC13		KRT32
GALK1	ALDH7A1		SNCG
DENND3	WDR5B		IFITM1
LPCAT3	CPNE2		TNNC1
VPS37D	TRIM5		GFY
ATXN1L	IL18		DLG4
ACAD11	ANAPC16		S100A4
DUS3L	PTPRA		CELSR3
IFFO2	ALDH1A3		KLRC2
GFOD1	RBM4B		ABCA1
SNAPC4	DHFR		KLRC3
DMAP1	WARS2		TCEA3
GALNT14	PPP3CA		BTN3A3
SLC26A6	MEX3C		ADGRF1
STYXL1	MBNL2		SLC2A3
MAFF	KLHL24		SLC15A1
BAMBI	WEE1		GPM6A
IRX4	SAT1		GRIN1
PCK2	FOLR1		ACOX2
NEU3	CD44
SH3BP5L	SMARCD3
SCARB1	ARHGAP18
SLC22A23	AXL
FARSA	JAG1
ETV4	MSANTD3-TMEFF1
TNPO2	APOBEC3C
TRAF2	DDX58
TBL3	ZNF704
MKRN3	TRIQK
CCDC28B	NUAK2
SCD	PNRC1
PLD6	TRIM2
TIMM50	CA11
FGFBP3	BTN3A1
NLE1	SGCE
GOLGA7B	HS6ST2
HMGXB3	TRIM38
GNA11	OXA1L
PROSER2	SELL
TBX3	RTBDN
COL1A1	UFM1
PLCD1	TNFRSF6B
USP19	HLA-DMA
KIFC1	MKX
ZC3HAV1L	APOBEC3G
OASL	CTSH
PRKD2	DNAJC12
SH2D2A	APOBEC3F
HSD3B7	BDNF
WDR24	CYP24A1
CENPO	SELENOP
PIM2	SUSD2
CCDC134	CEMIP
SMPDL3A	CASP4
C15orf39	HLA-DPB1
IQCD	FN3K
INPP5E	NT5DC4
POLM	ANKRD28
BYSL	OR51B5
TYK2	PLAU
AGPAT4	ZNF467
COPS7B	TSPAN1
ELOA	OR51B4
PSRC1	APOBEC3H
CDK5RAP1	SULF2
AMDHD2	SLC6A20
POMT1	TCN2
SUPT5H	TNNC1
SLC27A3	GFY
ECSIT	KLRC2
NEK8	S100A5
HEXIM2	KLRC3
ATAD3B	TCEA3
C1orf35	LIF
TAZ	BTN3A3
CRISPLD2	ADGRF1
ZNF263	SLC2A3
RITA1	SLC15A1
ZNF646	GPM6A
TMEM249	F8A1
ABCF3	F8
POLDIP2	FAR2
PFAS	LIMCH1
SEPHS2	ACOX2
PPP1R26
ITPRIP
ZNF205
TSSC4
MAN2B1
C19orf47
CHADL
CENPA
WDR59
SDCBP2
CCDC157
NAGPA
IFI35
ELL
MVK
ZNF500
KLF11
ZBTB48
NCKAP5L
SECTM1
PEF1
KCTD5
SETD1B
CLCN7
HIRA
C1orf116
ZNF672
CLN3
PKIB
MARVELD3
GMPPB
MYEOV
SLC25A15
CYSTM1
TMEM161A
TARS2
TOMM40L
CRTC2
ST3GAL1
PLEKHN1
HILPDA
DBP
EDC4
PRR5-ARHGAP8
AKAP8L
TRPM4
CTC1
SLCO4A1
ARL4D
TNK1
PHF7
E2F2
NADK
NBPF1
TFAP2E
DOHH
MYO19
SLC35A4
SIK1B
PINX1
AP5S1
IMPA2
DDRGK1
CAD
QTRT1
LONP1
TBCC
PTK2B
LIPE
PACSIN3
GPN2
RBM19
NPRL3
TRAFD1
TAF6
XYLT2
ICAM5
MAP1S
SIK1
MLLT6
HK2
SCO2
AAR2
FBXW9
GCN1
FLCN
GRHL2
RPAP1
NUP188
GRWD1
DND1
GPRC5C
DUSP7
ZC3HC1
BRF2
ADORA2A
ACOT11
FBXL18
CHPT1
NTHL1
DUS2
WDR77
SUV39H1
DDX28
TBKBP1
MID1IP1
DRG2
NDRG1
KCNK5
PEX6
MCM3AP
PANO1
AP1M1
CKMT1A
PSMC5
OVOL1
ZNF408
FBF1
XAB2
EXOSC6
RETSAT
LRRC61
MYO18A
SLC9A1
MAML1
UFSP1
PRSS3
EIF2B5
MFSD3
ABTB1
ANGPTL4
VASP
YJU2
KCTD12
GGA3
ZNF513
LIME1
GPER1
EDC3
SNAI1
TRAPPC4
UCKL1
CASKIN1
PTDSS1
HAUS7
RPUSD3
KIFC2
CD68
IRF5
RGS16
MED14OS
SYCP3
CYHR1
PDLIM2
PLEKHA6
TACO1
CTRL
DAB2IP
STAC3
SIRT3
CFAP73
ZNF581
ANXA10
SATB2
PRR12
TRIML2
CKMT1B
AKNA
MGLL
TTC39A
FAM86B2
RGS3
TMEM191C
TMEM191B

## Sheet: Table S4
Table S4: Differentially expressed genes (DEGs) in TOP3B-KO Ribo-seq associated with mental disorders
Autism related genes (43)	Schizophrenia related genes (22)
TTN	TEF			down
DLX2	SLC45A1			up
SLC45A1	ARHGAP40
PER2	PRR12
NAV2	SYN2
PER1	ME1
DMXL2	PTK2B
SBF1	SATB2
PRR12	CHRNA7
SYN2	ANKRD13A
TUBGCP5	FGFR1
SMC3	PAM
CHD8	NRGN
SATB2	ZSCAN2
SYNJ1	PDE4B
GALNT14	MDK
ZNF559	B9D1
KANK1	NT5DC2
KDM5B	TNNC1
TET2	GPM6A
JMJD1C	INPP4B
CHRNA7	BDNF
UBE3A
STK39
INPP1
ALDH1A3
GNAS
DLG4
SGSH
CORO1A
FAT1
NR2F1
MTHFR
DMPK
SYT1
ARHGEF9
IRF2BPL
GRIN1
SLC1A1
NUAK1
BCORL1
VAMP2
CEP290

## Sheet: Table S5
Table S5. DEGs in Y336F-KI, TDRD3-KO and FMR1-KO.
RNA-seq (Y336F-KI)		Ribo-seq (Y336F-KI)		RNA-seq (TDRD3-KO)		Ribo-seq (TDRD3-KO)		RNA-seq (FMR1-KO)		Ribo-seq (FMR1-KO)
Down (1272)	Up (1911)	Down (1111)	Up (2188)	Down (1061)	Up (1408)	Down (1087)	Up (1417)	Down (438)	Up (427)	Down (665)	Up (627)
SLC38A5	MT1A	EVA1A	SLC15A1	ANXA10	SPR	ANXA10	MZT1	PRPS1	FGFR3	PRPS1	CERK
ABCG1	SPARC	SLC38A5	SPARC	CD33	ZFYVE21	TNKS2	SDHD	LMAN1	TRAIP	LMAN1	SPIN4
ZNF595	APOBEC3G	CD33	ITGBL1	DPP4	LRTOMT	TDRD3	HSP90B1	AKR1C3	CSPG4	FMR1	RPRD1A
CD33	ITGBL1	ABCG1	APOBEC3G	PALLD	SLC35E1	DPP4	RBM12B	AQP3	ANKRD52	F5	ACTR6
EVA1A	TACSTD2	ZNF550	TACSTD2	TNKS2	NAA40	PALLD	CEP295	GRHL3	FAM160A1	AQP3	MYO6
ZNF426	LGALS9	PPT1	HOXB8	SPOCK3	MAP4	CD33	ZFPM1	MYH15	CCDC74A	SLC25A53	ZNF326
KRT6B	EHF	CASP10	EHF	GCNT3	TIMP3	WWC2	RHBDD1	MARCKS	IRF2BP1	MARCKS	HIPK1
KRT6A	HOXB8	KRT6A	F10	ARL4A	GALNT11	TIMM17B	TOP1	CORO2B	CKLF	UPP1	MTHFD1
ZNF550	SEMA3A	ZNF595	GGT1	PKIB	RILP	ARL4A	RABEPK	NT5E	CDC42BPA	PRRT1	FBXO34
PPT1	SLC15A1	TMEM200A	MAP4K5	RHOU	SLC46A1	STAC3	TM9SF1	SLCO3A1	FJX1	PDE4C	EIF4A2
FN3K	APOBEC3F	GPR143	SEMA3A	SUSD4	CADPS2	ACSL5	RNASEH2A	SEMA3C	DMTN	KLF12	TRPM7
TRHDE	APOBEC3C	ZNF426	GPR15	KRT6A	CD151	TTN	SLC25A39	KRT6A	FOXA3	CFAP57	VPS37A
MCAM	ID4	ANXA10	SLC22A18AS	TMEM200A	ZFYVE27	CLGN	SCAMP2	UPP1	USH1C	MYH15	CDC25A
TMEM200A	APOL6	ICAM1	APOBEC3C	FGF2	PGS1	PPARG	PTMS	PBX1	PSRC1	PDGFA	HSPA4L
ANXA10	GPR15	CPA4	HIVEP3	CLGN	GPAA1	CD24	RHOC	PRSS3	ITM2C	PGBD4	ADNP
ICAM1	APOBEC3H	MCAM	CEP290	PRDM1	SLC35C2	BMP4	HSF1	ARL4A	PHLPP1	PCYT1B	WASF2
CASP10	ALOX5	CAV1	ALOX5	ACSL5	CHST12	AGRN	GPR137	PRKCQ	PKP4	ARL4A	ATP1B3
GPR143	PDGFC	TTN	KLK10	VCAN	ENTPD4	THBS1	UPF1	MGLL	PPP1R13B	RNF223	IGSF9
DKK1	BDNF	DKK1	RASGRF1	ZNF502	DNAJC14	NR2F2	CAMSAP3	RGL2	BTN2A2	MGLL	DNAJC2
CAPN6	RUNX2	SCN2A	MILR1	CCDC28B	SLC9A7	TMEM200A	CRTAP	ZFP42	RASSF2	PRKCQ	ADK
CPA4	NAV3	NCAM1	LIF	NR2F2	YIF1B	FGF2	PLD3	HAS3	CGN	CORO2B	SLF2
HS3ST1	LGR4	GPAT2	ANK1	IL20RA	SYNJ2	SMAD7	RELL1	DPP4	MCM9	SEMA3C	PLAGL2
CAV1	PLCXD1	ZFP42	FSBP	DLK2	NAGA	KRT6A	LRBA	GLT8D2	GRAMD2B	TCP11L2	ATP1B1
CD68	COL9A3	CAPN6	APOBEC3F	CD24	CDC42EP2	GPR15	TTC17	VCAN	TIGD2	RGL2	CBX6
ZNF804A	KLRC2	ZNF772	ID4	CAPN6	SH2D4A	SLC25A44	RHPN2	TMEM191C	ATP1B1	PBX1	PRRC2C
SPNS3	KLK6	CORO6	CYP26B1	KRT6B	UGCG	ANGPT2	IL17RD	HSPB8	C15orf40	GCNT3	CSPG4
NCAM1	KLRC3	HS3ST1	BDNF	ERICH5	MAN2A2	CAPN6	SSH1	SOCS1	RTL6	HAS3	PDE4A
GPAT2	SNTB1	CAV2	RUNX2	BCL11A	FADS3	DACT1	UBC	ARSD	METTL15	LAMC2	COMMD2
CAV2	KLK7	RPP25	APOBEC3H	TIMM17B	SNAP29	SH3BGRL2	ENOSF1	SEMA3D	MSRA	STOML1	ALG9
COL12A1	APOBEC3D	MGLL	NAV3	SMAD7	MMP24-AS1-EDEM2	GPR143	NENF	LAMC2	MZF1	CDKN2B	ETNK1
FGF2	INPP4B	ETS1	PDGFC	CHPT1	MFSD11	CPT1C	GPR107	PROM2	SRGAP2	PRSS22	USP8
DNER	HOXB4	HAS3	ANK2	PBX1	CHP1	RHOU	COPA	KRT80	NIPAL3	LACC1	EPS15
PALLD	ZFP37	CD68	KLK6	FSIP1	ERBB2	MYB	KLF5	POU2F3	PANK1	TIAF1	TRAPPC10
ZNF772	APOBEC3B	MUC16	KLK7	PPARG	IL1R1	PKIB	CAST	ANGPTL4	RWDD2B	ZNF573	CARNMT1
PPP1R14C	NT5DC4	TM4SF19	APOBEC3A	ZNF350	E2F1	MFSD14A	ZDHHC12	MSX2	RGS3	ZNF860	PSMG2
ETS1	KIAA0040	COL12A1	PLCXD1	ZHX2	NPC1	HAS3	DYNC1LI2	FMR1	CILP2	PPP2R5B	HMG20B
RPP25	DCUN1D3	PLAU	ZNF704	SYCP3	FKBP9	CHPT1	TRIP11	NDRG1	ADAM11	CLIC3	FOXP4
STAC3	MAML2	PALLD	INPP4B	ANGPT2	ITPKC	ERICH5	MTHFD1L	PTP4A1	CCDC88C	RAET1L	KNTC1
CLGN	KLK10	DNER	SNTB1	SEMA3C	TM2D3	PBX1	POLK	VPS13C	DENND2D	PRSS3	TROAP
ARL4A	LYRM1	DACT1	C11orf95	KLF4	EPB41	ANTXR2	HSBP1	NUTF2	NXPH4	DPP4	ZFP91
HSD3B7	MEIS2	RAET1E	LGR4	GPR15	PTTG1IP	ZHX2	BUB1	ZSWIM5	CTSH	BHLHA15	PTPN13
NRG2	ZNF704	KIF16B	CNTNAP3	TDRD3	FAM160B2	HMGA2	INTS7	KRBA2	FAM131C	TSPAN10	RAB12
PACSIN1	SH3TC1	TMEM145	FGF9	MFSD14A	METTL21A	ZNF502	SETX	LRPPRC	ZNF580	CORO6	RAB20
LGALS7	ANK2	KLF4	NOL4L	GPR143	ISYNA1	ZNF443	STAM	CYP27B1	MKNK2	SLCO3A1	ZNF664
TTN	PRSS23	STAC3	KLRC2	DISC1	NETO2	RAB11FIP3	GPATCH1	GDPD3	TMEM185B	VPS13C	FAT1
HAS3	PLEKHA4	CSTA	NOTUM	BMP4	GRK2	SPATA7	AKT2	NFIB	SASH1	COBLL1	FOXRED2
ZNF614	FGF9	GPR82	CEMIP	PALM3	EXOC7	ATF7IP2	KDELR1	ICOSLG	ERVMER34-1	CPT1C	ASCC3
DACT1	PEG10	PRDM1	DTX4	EGR3	SLX4	FRMD4B	GPC1	CD68	EBF2	RBM24	AKAP1
HOXC5	CEMIP	STON1	MEIS2	PRSS35	BRF2	SAMD4A	AGPAT3	CLGN	LOXL1	TMCC1	MCTS1
PRDM1	SMIM3	ARL4A	ANKRD26	MOB3B	ATP1A1	VCAN	CAPG	RNF223	TSHZ1	CSF2RA	FKBP5
GPR19	MAN1A1	AKAP12	MAML2	ZNF84	IFT172	LOXL3	BRF2	PDE2A	TMEM165	KYAT1	GLRX2
DPP4	MILR1	CYTH4	USP35	SLC26A4	KANSL3	SLC31A2	ZDHHC24	RPH3AL	TK2	MSX2	TP73
PLAU	LRMDA	PRPH	CSF2RA	ZNF391	CKAP4	CCDC14	ANKRD39	PAM	SUGP2	GDF11	KRBOX4
TRPV4	RASGRF1	CYSRT1	COL9A3	HAS3	SNX9	C1orf210	FOXO1	WWC3	WNT3A	SULT1C2	RNF130
KLF4	ANK1	STON1-GTF2A1L	PEG10	SH3BGRL2	KLHL36	KBTBD8	TMEM43	COL4A5	SMDT1	ACTA1	LIN7C
KCNH3	NPTXR	FGF2	CNTNAP3B	FKBP7	MTCL1	CKMT1A	SNX14	MAOB	TMEM97	NDRG1	ST7
SCN2A	F10	PPP1R14C	APOBEC3B	ARHGAP29	SLC37A1	GEMIN5	MED4	SLC25A42	ACAD10	SHROOM2	BRCA1
KCTD14	KIF26B	MYO15B	KIAA0040	MYB	HHLA3	CHD8	PDCD10	TIGD1	MYRF	LY6G5B	ZNF644
DES	CASP4	ZNF614	TRIM22	SOBP	DNASE2	ZNF426	ANO9	CYB5A	LTBP4	TMC6	SGO1
ALDH1L2	MAP4K5	HPSE	APOBEC3D	TTC30B	IKBKG	SEMA3C	ELOB	F8A2	MBLAC2	MUC3A	TOP2B
FBXO32	CNTNAP3B	FAM122B	HOXB9	CCDC14	STC2	KLF4	INPP4A	IL6R	TMEM109	SLC24A1	CEP95
ALDOC	DTX4	AKR1C3	KLF12	MYH15	GBA2	ELOA	NFYB	KLF12	PSKH1	NUTF2	RUSC2
CSTA	TP53INP1	ALDOC	LATS1	LYRM4	ZDHHC5	TSPYL4	CYB5R2	GAS6	GAA	P2RY1	SS18L2
NT5E	CSF2RA	HSD3B7	CYP24A1	GEMIN5	GPR107	MAP6D1	DDB1	SMIM27	OTUD5	CERS4	ID3
LRG1	HIVEP3	DGKE	LOXL4	CCDC112	LSR	ARMH4	RAB2A	NLRP4	PNPO	C17orf97	PARP9
STX11	SEMA3B	NT5E	BANK1	ARHGAP40	IMMP2L	MAGI1	DNAJC3	ME1	CLIP2	EVA1B	RAD51C
LGALS7B	SPTSSB	PRKCQ	DCUN1D3	CFAP44	FUCA2	CKMT1B	LIMCH1	TIMP3	GLIS2	ANKRD9	EXOC6
PRPH	LIF	BAMBI	PRSS23	ARHGAP26	NFIC	TMCC1	IMPA1	MYH10	NKD1	VPS9D1	PDE8A
CPM	KLF12	ZHX2	ETV6	CPM	PTPRA	CLEC11A	ITPR1	GREB1L	PHF2	ULBP2	RNASEH2B
SLC5A5	CYP26B1	CLGN	SLC16A6	PRKD3	BACE1	UAP1L1	SRPRA	ZNF675	MDH1B	AGPAT4	SMG7
CYSRT1	LZTS1	STK39	HOMER3	HMGA2	PPIE	SAP30	CRYZ	WNK1	DHRS13	AK8	DSN1
MYO15B	METTL7A	KCTD14	MAN1A1	PDE3B	MPG	MARVELD3	MANBA	FGFBP1	PRSS8	SLC26A4	SF3B1
HSD17B6	SYT1	HOXC5	SPTSSB	FARS2	PKN1	MAOB	FAM199X	DNER	ATG9A	GPR157	DNM1L
MYH15	ABTB2	SIRT5	PLEKHA4	WWC2	HEBP1	SPATA33	CSK	HELB	SAP30	EPN3	ENOSF1
RAET1E	PBX1	DPP4	SEMA3B	BDH2	GLIS2	FRAT2	FOXK1	SDCBP2	MAP3K9	RAB4B	HLTF
STK39	NOTUM	WSB2	SYT1	RPP40	KCNQ2	MRPL22	MAPKAPK3	TTC39A	CEP44	CDX2	MCM3
CORO6	LOXL4	MYBL2	IL17RD	CTRL	MUL1	ZNF362	TOR1B	NAIP	SEZ6L2	KRT32	MED1
MGLL	ZCCHC12	HCFC1R1	ZCCHC12	CORO2B	PIGT	FYN	NPC1	PALLD	GFPT2	JARID2	UBB
ZHX2	SKAP1	CPM	MBD6	WNK2	C19orf54	PDLIM3	TOM1L1	RHOU	TIMP2	ZNF696	MAN1A1
BAMBI	SLC16A6	ABCB1	KISS1R	LRG1	GLG1	EFNA4	SLC39A6	GGT1	PTCH1	CYB5A	ANAPC7
WNT16	SEMA3D	LRG1	APOL6	SMPDL3A	SBNO2	PDE3B	IARS2	SQLE	ERV3-1-ZNF117	SLC16A5	MTHFD1L
KRT20	HOMER3	KRT20	CASP4	TBC1D19	PLXNB2	COMT	DCP1A	PRDM5	TMEM132A	ARSA	DHX33
PLAC1	CNTNAP3	LDHD	SULT1A2	SLC25A52	ZBED6CL	SLC25A21	DAG1	ANTXR2	COQ8A	ANGPTL4	SLC12A8
PPM1N	SYTL2	AMMECR1	RPS6KC1	NRG2	PEX10	ARHGAP26	PPP2R3A	LAMC1	CGGBP1	CD68	GMCL2
P4HA1	PRKAA2	BAX	C15orf41	PGBD4	PPDPF	ARHGAP29	TUBGCP4	TMCC1	TTC19	RCAN3	PLXND1
POU2F3	ADAMTS14	FBXO32	PDGFB	CHKA	METTL26	NTN4	PRCP	YPEL5	RUNX3	SFN	TXNRD3
SMARCA2	ARSJ	KCNH3	BTG2	ZNF595	MBTPS1	AREG	ZRANB2	DSC3	TPRG1L	TTC39A	SCFD2
LAT2	SP6	NFIB	SMIM3	TIGD1	CHRNB1	HIVEP2	CPA4	NR2F2	DUSP9	EPB41L1	PLCB4
PRSS35	TNNC1	APH1B	SYTL2	PTP4A1	SNX8	TSPAN5	NDC1	EPAS1	SERPINB9	IER5L	NECTIN2
VGF	SULT1A2	SMARCA2	IL18	RNF128	GAS2L1	ADAT3	CHMP7	MYZAP	CYB5B	CPQ	ERGIC3
MAOB	OLFML2B	CPT1C	METTL7A	ELMOD1	VPS9D1	EPOP	SLC25A3	RALGPS2	KCNS3	AKT2	KIF15
HPSE	IL18	WNT16	CCDC50	PRPF19	TRIM5	CCDC173	TECR	HMGCS1	MAPK8IP1	DENND3	IL6ST
RASGRP1	ETV6	PTP4A1	PPM1H	ADORA2A	NFKBIL1	AMER1	DGUOK	GCNT3	SSBP3	SCAND1	ABHD10
MUC16	HOXB6	P4HA1	LZTS1	MAOB	INF2	ZNF821	AKAP1	ZNF329	ZNF738	FGD3	DYNC1LI2
AKAP12	SLC25A48	NRG2	TSNAXIP1	BAMBI	C1orf43	RTL8B	CENPM	ELK3	BTC	MAOB	SACM1L
ANGPTL4	KISS1R	IL20RA	LYRM1	SMC3	ACOT7	C6orf52	AAAS	SULF2	PSTK	WNK1	SIPA1L2
RNF128	PLEKHA7	COL6A2	NPTXR	CKMT1B	GALNT4	ECSIT	RAB3IL1	ALCAM	APBB1	ASS1	LRIG2
BCL11B	SOX9	MOSPD1	ATOX1	PDE2A	RIN1	HILPDA	RAB11FIP5	GRB10	SIPA1L1	CLEC11A	NQO1
MOSPD1	CYP24A1	FADS1	SNCG	HOXC5	TCAIM	ZNF84	TOP1MT	TRIM16L	DNM1	NME3	TTC3
GREB1L	NR4A3	SGPP2	ZDHHC2	VASH2	EDEM2	TBC1D19	MAP3K12	MYBL1	STMN3	MON1A	WRN
IL20RA	TINAGL1	SQLE	NDRG4	ZNF804A	KBTBD11	ACAD11	SLC44A1	KBTBD8	ZNF124	TMEM40	ARID4A
SQLE	S100A5	PDLIM3	PAQR8	CD2AP	ZNF695	TANGO6	ZNF451	PANX2	KIAA0895L	MYH10	SCOC
CA2	C19orf57	GREB1L	TP53INP1	TRIML2	STBD1	PRR12	TAP1	RGS20	BUB1B-PAK6	TMEM116	ENPP4
AKR1C3	PRSS22	TIMP3	ITPR2	TRIM6	WDR37	HMOX1	ATP6V1E1	IL20RA	HLA-F	LAMC1	LCLAT1
NDRG1	ARNT2	MRC2	GOLT1A	HSPH1	PLEKHG2	ENC1	FAM160B2	CORO6	ATF7IP	CCDC85B	IDH3A
PDLIM3	EVPL	AGPAT4	DUSP6	NFIA	FAAP20	SBF1	ERVMER34-1	GJB2	FHDC1	CTSL	CST3
DHRS2	C15orf41	CCDC24	PLPPR4	MEX3B	ITSN2	SPSB3	COQ7	FPGS	TERF2	C11orf71	ZNF609
MRC2	IFITM1	DOC2A	GSDME	EFNB2	EPHX4	CFAP69	ANKFY1	SRP68	SLC41A3	C6orf52	SIPA1L1
FADS1	CCDC50	NPNT	LRRC41	SAP30	TMEM101	DOK1	GLG1	STARD4	ATP2A3	ACTA2	CNN2
PTP4A1	KLK5	FOSL1	SKAP1	KCNF1	KIF1C	RPP40	LRSAM1	WNT3	BRCA2	FURIN	NDC80
TIGD1	CORO1A	TMC5	ARL14EPL	SLC25A42	EPAS1	ID2	NDFIP1	KLF4	CRY1	GJB2	FERMT2
LAMC2	DRAXIN	CDK6	DRAXIN	ID2	SLC2A11	GTF3C4	C1GALT1	SHTN1	DUSP28	ZNF624	WLS
AFAP1L1	EPS8	DHRS2	GSTM2	TMCC1	SLC39A9	RNF5	MYO1D	TMC5	NKX3-1	S100A14	COP1
ZSCAN5B	EPB41L4A	RNF128	KLRC3	MARVELD3	NAIP	CHKA	SLC11A2	MITF	FOXRED2	MOB3C	IVNS1ABP
RBM24	JAG1	GNL3	PBX1	CHN1	DAG1	PRKD3	RNF6	FAS	CYB5D2	SDR39U1	SFI1
CYBRD1	PRF1	TTC3	OSGIN1	CDKN3	FZD1	IP6K1	BTG3	INSIG1	ZNF510	C3orf18	PSME1
EDNRA	LDLRAP1	ANGPTL4	FOXC1	PDLIM3	NOMO1	LMBR1L	MGST2	FDFT1	FAM227A	SLC2A8	LRP4
SLC2A4	FOXC1	LAT2	GABRG2	PPP1R14C	MXRA7	MON1A	COQ6	ALOXE3	GNG7	EPAS1	CIZ1
ECM1	HES1	TRPM6	DNAJB2	ECSIT	TMEM106C	TSPAN10	OLFM2	TSPAN14	FAM234B	CTSV	FUT10
CPT1C	DENND5B	SLC4A7	ABTB2	ZNF266	YIPF5	BRD3	MTG2	S100A14	LRRCC1	AKNA	DENND4A
HCFC1R1	PDGFB	DISC1	S100A4	CCT6A	DDT	STK17B	HDLBP	ITGB4	POMT1	GREB1L	ZNF821
CGREF1	ENKD1	JMJD4	FRMD4B	GRHL1	PIEZO1	POLE3	TTC12	HMOX1	PDE4D	B4GALNT1	KLC3
CDK6	NPEPL1	RAB3A	EVPL	MRPL44	KHNYN	COCH	WDR41	IDI1	RND3	VEGFA	ADGRL1
STEAP1	EPN3	TTC25	ZNF746	AGRN	DPP9	ZNF649	CD81	TRNP1	CUEDC1	C16orf91	AHCYL1
TLCD1	SCML1	OSTM1	RAB40B	TSPYL4	TMEM268	DENND3	TMEM132A	DSC2	CYBRD1	LRPPRC	PTPN12
TIMP3	AHR	CYBRD1	SOX9	GRHL3	NFIX	RILPL2	NAT9	SCFD1	FAM24B	TUBB2B	SDCBP
NPNT	RPH3AL	MAOB	TINAGL1	ARMH4	SDC3	MED12L	FAM91A1	AGPAT4	RAB27A	LRRC26	SMAD1
KCNK6	PTPN14	NDRG1	C16orf74	ZNF134	TOLLIP	ZNF286A	SIGIRR	MYEOV	CELSR2	CRABP2	GABRD
GAL3ST1	IL17RD	RASGRP1	MACF1	CHD8	CCND1	FRYL	CREBBP	C11orf71	MLLT6	SQLE	SLC9A6
SLC35G2	NOL4L	MT2A	FAM189A2	MRPL22	GATD3A	TYMSOS	HLCS	ACOX2	ARNTL	FXR1	LRRK1
DLK2	PPM1H	TRIM9	CYP1A1	UTRN	MAPKAPK3	FARS2	NCOR2	LAMA3	ASRGL1	SGSH	DCP1A
MCOLN2	SLC44A5	TLCD1	LYPD6	ANGPTL4	SLC35B2	ZFR	UBR4	PMAIP1	AGFG2	ALOXE3	MAP1B
ABCB1	PROM2	UPP1	PLEKHH1	TBX3	WDTC1	HOXA10	RAB1A	CPT1C	ZNF318	KLF4	ITM2B
TTC30B	ZFP36L2	TMEM141	CTHRC1	HSD3B7	POC1B-GALNT4	MAIP1	ABHD14A-ACY1	HS3ST1	SEMA6B	PALLD	PPP4R2
TTC3	PLK2	STEAP1B	CUEDC1	CDIP1	TEF	MCOLN2	VAMP7	PICALM	MBOAT1	PRAG1	DDHD2
ZEB1	SYNE2	PDE2A	SOX4	MBD6	LRIF1	TPRN	ITGA3	FBXO6	FAM111A	PSMB10	LZTR1
TM4SF19	DUSP6	GGCX	SEMA6B	GREB1L	SUN1	CBX2	FUCA2	SFN	C1orf21	HINT3	TMPPE
CYTH4	HOXB9	ORMDL2	GDPD3	SATB2	TADA3	ATL1	TMED3	UBE2E2	JADE2	MSRB3	RGS19
NFIB	MED25	KCNK6	HECTD3	THAP10	TP53I11	SMC3	RETREG2	BNIP3L	PGBD2	ABCC5	CEP57L1
PRKCQ	DMXL2	DES	ZFP36L2	SAMD4A	SPECC1L	YLPM1	MAGT1	ITPR1	GOLIM4	PPARG	CAPN15
APOLD1	TNS3	FRAS1	HNF4A	FERMT2	CACFD1	RBP1	AGO3	GJB3	KDM8	ZNF675	PPIP5K2
KSR2	RBPMS2	MT1G	ZFHX2	GTF3C4	FAM219A	CEP68	NDUFAF3	RPGR	PRRG4	GABPB2	ADAMTS7
GNL3	HECTD3	LGALS1	ENKD1	SAAL1	LRRC56	PRPF19	PHF1	EFNB2	WNT2B	SLC25A1	RAI14
ZFP42	OSGIN1	FLNC	CBX8	PNMA1	MTG1	SAAL1	AFF1	ITGA6	HNF4G	PHACTR2	CLIP2
IFI35	ZBED1	LAMC2	ANK3	OSCP1	ARHGEF4	LYRM4	STEAP1B	BHLHA15	SOX4	KSR2	E2F3
ANXA3	SNCG	CD47	SLC41A3	CKMT1A	PIP5K1C	AGPAT4	TK1	ENPEP	SUOX	CERKL	EFNA3
TERT	NDRG4	MYH15	PLK2	CORO6	SRPRA	GPR137B	GUCD1	PINK1	TARS2	PIN4	BORA
BAX	SLC41A3	PCID2	LDLRAP1	ACAD11	TFE3	EID2	ZFP36L2	ERMARD	PBX4	CFLAR	FAM71E1
PDK4	ADAM19	CLSPN	YPEL5	ABCC2	MAGEA3	BCL7A	ETHE1	TMEM205	CACNB3	MRC2	TRIM24
TMEM145	HSPG2	WDTC1	ASMTL	SLC25A44	LITAF	GDAP1	UBE2H	EML1	DDIT3	HS3ST1	ENDOD1
CKLF	CUEDC1	MLLT3	SLC25A48	MAIP1	ADCY3	PPP2R5B	USP33	FAM83B	CERK	NEU1	PXMP4
OSTM1	SP5	VGF	PPFIBP1	NAV2	CCDC120	SUSD6	RAB5C	VSIG10	ZC3H6	NUDT8	CCDC88C
CHN1	PDLIM5	MSH6	MEX3B	ADAT3	CREB3L4	SYMPK	TBC1D9	S100A16	OAS3	WDR78	ACTR3B
UPP1	KALRN	FAM241A	OLFML2B	RBP1	MGAT5	CDC14C	CLU	WSB2	TMEM40	C19orf33	BUB1
PAG1	PPFIBP1	CA2	RSPH1	PAG1	SLC15A4	TRMT12	GNB1	C9orf43	RFXAP	ST3GAL1	EIF4EBP2
TMEM205	TNIK	HSP90AA1	RBPMS2	PLCH1	SPAG1	ZNF266	UTP23	GALNT14	TERT	USE1	SLC35B4
FAM241A	PARD3	C21orf58	MKKS	HMOX1	FAM47E-STBD1	FN1	F2RL1	STEAP1B	TTC13	GAREM1	GSDME
CDKN2B	TRIM22	ATP10D	BRF1	PCDHGB2	RNF135	CD2AP	PRNP	MCEE	NGFR	FAM32A	TOGARAM1
KCTD12	ANK3	GALNT3	SP6	MCEE	RCN1	ZNF134	SLC35F2	NOLC1	ITPKA	TP53I13	AASDHPPT
TSPAN5	MTMR8	CD55	TMEM37	HOXA11	RAB28	AP3S1	PREB	AKR1B1	RTL5	TSPAN18	MKI67
PDE4D	ASMTL	SCG2	PTPN14	SLC5A5	ZSWIM7	DPF1	COPS7A	SNAPC5	ICAM1	CALCOCO1	SGK3
PRUNE1	CDX2	MCOLN2	SLC25A29	NRARP	SPEG	SDHAF3	MCC	PEF1	CTR9	ZDHHC1	TRIM44
FOSL1	P3H3	IFI35	PRKAA2	CFAP46	EFL1	WDR25	DNAJB1	DENND1B	RPP25	ACTG1	IFIT5
PDE2A	ABCA1	TBC1D19	HIC2	TUBB4A	DAP	QTRT1	TMED9	PROS1	FZD1	ARHGEF37	HSPG2
CNTD2	SESTD1	UCP2	TMEM80	MTERF2	ARHGEF28	CCT6A	SWI5	DNAAF4	GPRC5A	C12orf75	RAPH1
MYBL2	SHROOM3	GLB1L	ANKDD1A	RASD2	LMBRD1	FOSL2	MMP15	CTSV	SLC9A5	FLCN	TMEM97
GGH	DUSP9	PLEKHA2	ARSJ	OSR1	TNKS1BP1	ZNF211	UBA2	FAH	NRG2	STX7	NCK1
ZNF222	SULF2	ITGA1	FAR2	GDAP1	TKFC	RTN4RL1	SYVN1	CAST	RASD2	P3H4	FBH1
ASPHD1	NECTIN3	AFAP1L1	BCAM	SUMO3	SPRYD3	DAPK1	HDAC1	WDR44	PAX2	KCNH2	ZFC3H1
TMC5	SCARA3	POU2F3	FBRSL1	TSPAN5	STAT3	UBE2E3	CNNM3	KLF10	PLEKHA7	ZNF658	NCBP1
MLLT3	MXD4	TBK1	PATL1	KRCC1	WIPF2	IRX4	PRR14	PAOX	ZNF44	GLUD2	PTRHD1
IFI6	ARL14EPL	MSX1	DDX60	ZNF362	ZFAND3	PTP4A1	FAM43A	CAV2	C22orf34	BLVRB	RETREG3
KCNAB2	WIPI1	SLC35G2	ZNF587B	SLC7A2	AP2B1	MED11	MYH14	INO80B	SPTBN1	FGFRL1	INTS7
CD47	MEX3B	TSPAN5	NTN4	MAGI1	KANK3	TBX3	TACC1	GRB14	KIF20A	NR2F2	NEDD1
MT1F	FAR2	ARHGAP29	ZFP37	PLEKHG6	IQSEC2	PROSER3	CAMTA2	UBE2E1	PLEKHO1	ITPRIP	SSU72
DUSP19	CDC42BPA	KCTD12	PLEKHA7	KIF21A	LRRC24	CCDC112	THNSL1	ABHD6	CDIP1	TRIM16L	ANXA10
COL6A2	BHLHB9	IFI6	E2F7	IGSF9	CUL9	GRHL3	GNAI2	TMC7	CHD5	ZNF547	SNX5
LPAR3	C2orf15	SPPL2A	ADAMTS14	AREG	ARPC1B	EML1	LZTR1	TNFAIP2	FGD1	ZNF823	HINT2
AK7	CTHRC1	TRPC1	EML3	FUBP3	PLCB3	MTRNR2L6	AIMP2	FERMT1	FGFR2	MISP	GDA
TOP3B	MACROD1	EVI5	ARHGAP18	HTR7	TLN1	TMEM98	FADD	ASS1	SNN	DLG4	HSDL1
FAM122B	BANK1	MFSD3	DUSP22	FAM161A	RUSC2	BDH2	PAPSS1	SMPDL3A	ZNF512B	S100A16	PI4K2B
TPBG	MKX	PKD1L2	SYT11	RBM20	GPR108	HMGN3	PIEZO1	C2orf76	CBWD6	ATP7B	HERPUD2
NAT10	BTG2	TPBG	PARD3	CEP68	TRIM68	KLHL17	LRRFIP2	ARFGEF3	TSPYL2	FAH	RAB8B
FOSL2	MYRIP	EDNRA	PROM2	ELOA	PTGFRN	TUBB4A	KANSL1L	FDXACB1	NOD2	PTP4A1	DCAF5
DHRS3	BCAM	TMEM183B	OSBPL8	COCH	CYFIP1	SMO	UBXN8	LSS	GPAT2	SMO	ZSCAN32
ACTL8	RPS6KC1	MYBL1	CORO1A	ZNF426	TCEA2	ARHGAP33	NT5DC3	FAAP24	SLC4A8	PLAU	TTPAL
DDIT4	ZNF112	DNAL1	MYRIP	CDKN2B	PALM	BEND3	CMTM8	GNAQ	DKK1	NOLC1	LRP12
ZFP90	PXDN	GUSB	ZBED1	FYN	STX3	EPHB3	TKFC	CAPN5	NPC2	ANKRD36C	ANKRD28
ATP10D	FGF18	CALB2	USP24	PCDHGC5	CKLF-CMTM1	ZNF845	RNF145	RHOF	CA11	ETS1	KDELR3
PDE4C	RAB3B	E2F8	FAM217B	MYZAP	RIC8A	PLD6	SNRNP27	NAV3	EPS8	RPS6KA4	THNSL1
LRRCC1	GDF15	NAT10	TBC1D16	COMT	RNF145	RBM15B	CHD9	PHOSPHO1	SAMD10	HMGCS1	SCN8A
ATP9A	CAB39L	PDK4	SH3D19	MEX3A	B4GALT5	FRK	HAGH	OSBPL10	AP1S2	CIC	RAB3GAP2
CHRM4	LIPT2	PSMD1	KCTD3	PLEKHO1	ZDHHC9	FLNC	QSOX2	MSMO1	LRP4	CAMK2N1	PRKD3
KCNF1	RCBTB2	CEP350	TTC37	BTBD11	PMS2	MAP3K4	MGMT	ALDH2	PRKCG	CEP290	ZBTB1
CKLF-CMTM1	GGT1	LRRCC1	SCML1	ZDHHC2	ARPC5	RGS16	GDI1	CAMK2D	CKMT1A	GAS6	TCF12
CLSPN	PPL	SNAPC5	SHROOM3	FOSL2	SLC17A5	L3MBTL3	BAG3	CIP2A	HERC5	PCBP4	KIF20B
KRBA2	CAMK2D	PLAT	LRRN2	ZNF594	MED18	MED20	SHKBP1	SCYL2	KMT2B	ATP9A	WDYHV1
AMMECR1	ITPR2	SAMD9	IL18R1	PCDHGA1	NPEPL1	TRIML2	ATMIN	SVIP	GFOD1	ADORA2A	RTL8A
MAP4K1	CHD9	KATNAL1	EPS8	PCDHGB1	HDLBP	GTF3A	PPP1R9A	TRIML2	CBX6	TSPAN14	IPP
PAPSS2	ZNF746	HSD17B6	MAP3K12	AQR	MAPT	MEX3B	AP2A1	RNF144B	RBMS2	HECTD2	ZNF462
CKMT1A	ANTXR1	CHN1	CAT	ZNF559-ZNF177	LY6E	NBPF15	THOC5	NR3C1	RET	LTBP1	ZNF711
SCG2	ARHGAP18	RAET1L	CDX2	PCDHGA3	NOD2	SLC7A2	TPD52	ANKRD42	ARHGEF2	EID2	DDB1
GDAP1	ARHGEF40	ATP9A	MRAP2	PCDHGB7	PTPDC1	TOMM6	TXNDC9	ING2	MELTF	TMEM205	CENPF
KIF16B	GOLT1A	FANCD2OS	ARNT2	PCDHGA12	GOLIM4	RBPMS	GORASP1	ARRDC1	CBX7	INSIG1	WDR72
CD55	DNAJB2	UBE2Q1	AHR	PCDHGA2	SIRT5	SUGCT	ESAM	RNF125	ZFHX2	MFSD3	ABCB9
SAMD5	TCF12	SMAD9	GDF15	PCDHGA5	LEMD2	SWT1	ODR4	NEU1	ABCB6	STX1A	KDM3B
UCP2	ATOX1	STEAP1	C14orf28	PCDHGB5	IL17RA	CSRP2	GLO1	CD47	LAMC3	NDUFAF3	IQCC
COCH	ZNF675	PHF7	KALRN	PCDHGA6	APEH	KCNH2	DICER1	MAP6D1	EFNA2	FBXO45	CPE
CLIC3	SAMD12	CHD8	PDLIM5	PCDHGC4	SNX19	SEPHS2	HIF1AN	PPARG	TJAP1	LRCH4	C8orf44-SGK3
ITGA1	SEMA6B	C19orf33	RSC1A1	PCDHGB3	ZNF239	FNBP1L	UGGT2	VWA1	CDKL1	ZNF525	TM7SF3
SEMA3C	TIGD6	IKBIP	OPLAH	PCDHGA7	PIGX	MORN2	ADAM17	HMSD	CD99L2	PRR7	TMEM170A
C1QL4	FBXL19	ZNF594	DNMT3A	PCDHGB4	PI4KA	RCAN1	BCAR1	CYP51A1	SLC38A5	EML1	USP28
BNIP3	CD163L1	TMEM171	ARHGEF17	PCDHGC3	SLC6A17	BCL2L11	ATP5PO	RAB3D	HHAT	DGAT1	CERS6
IKBIP	BCAS1	S1PR5	GADD45G	GKAP1	THRA	BPGM	LRRC42	HERC4	DCUN1D3	ZNF845	ZNF202
ARHGAP29	ADGRG1	ARHGAP40	TLE2	ANP32E	LTBR	SCHIP1	KIAA0232	GPR160	DZANK1	TSACC	TBC1D32
MSH6	GSDME	UBE4B	KIF21B	PCDHGA11	SRCAP	IQCJ-SCHIP1	NCOA3	ROR1	BMP4	POLR2E	ZNF3
PLEKHA2	NIPAL2	LPAR3	SRPX2	YLPM1	WNT10B	FUBP3	RIPK2	F8A1	ENKD1	TNFRSF12A	ZHX2
TEX19	CYP4F3	PIM1	DUSP9	PCDHGB6	RAB6B	SMG1	SDHB	GAREM1	RAB3B	CDK5R1	CSTF1
CBR3	KRT15	SPATS2	NIPAL2	KIAA0586	ICMT	SOX12	VPS35	SEMA4G	SORT1	SFXN5	CCDC50
DISC1	CBX7	ESAM	NPEPL1	STK33	PAFAH2	ZBTB17	MROH8	TTLL7	CHST2	KRT80	LRRC57
JADE1	SLC16A5	PRKDC	TNRC18	PCDHGA4	CRB3	FERMT2	TMEM54	CCNE1	CDKN3	FGFBP1	ITPRIPL1
CPVL	BRF1	RIOX1	ZNF396	HILPDA	CTNNBIP1	DYRK4	CD151	CHMP2B	DEAF1	TMEM256	SDAD1
SOCS1	TEAD2	TCP11L2	PITPNM3	CSRP2	RASGEF1A	LAMC3	SRPRB	TMEM167A	C3orf80	TM7SF2	TSG101
PLAT	COL6A1	PLIN2	TMEM221	PIR	AGPAT3	FAM136A	OAT	F8A3	GAD1	REX1BD	AHNAK
SLC45A1	TMEM159	C1QL4	TEF	PCDHGA8	FAH	WNK1	RNF10	NOL12	SLX4IP	BTBD6	ARAP3
WDTC1	RAB40B	MPI	GPD1	TMEM98	CYB5R3	TNRC6C	UBAC1	STX8	NETO2	FSCN1	ARL14EPL
LDHD	SUSD2	ACSM3	FBXL19	RTL10	MFSD14B	MRPL44	TMED2	MVD	GGT7	HDAC11	MYOF
SYT3	ZDHHC2	DHRS3	TRIM66	TANK	WDR1	KIAA0100	MIB1	ADORA2A	ADAL	GMPPA	ARMCX5-GPRASP2
NFIA	KLHL24	PLAC1	MED25	MPP7	FGFRL1	VASP	TP53I3	MISP	STARD9	AKR1B1	RPA2
PHOSPHO1	ROR1	CTSB	TICAM2	USP8	ANXA11	TEAD2	ATP6V1C1	USP38	RUFY2	SLC38A10	SIK2
PCOLCE2	FUCA1	MXI1	SLC44A5	MSANTD2	PCNX3	ISCA1	HERPUD1	ELOVL1	ITGA7	ZNF34	UVRAG
GALNT3	AKAP17A	SESN3	TNS3	CITED1	PRKACA	MAP1A	C5orf51	CCDC85B	GPRC5C	ZNF503	ZNF26
TRIM9	CACFD1	COCH	STK11	MLLT6	POLN	AQR	SLC1A1	BEX2	CD83	PAM	DPYSL5
E2F8	CTNNBIP1	PHF20L1	JCAD	RANBP6	SLC44A3	CBX8	ZNF385A	BNIP3	ERI1	LSS	PRPF39
SPATS2	JAK1	CKLF	ZNF675	RGS16	MINK1	ZNF675	NUP85	EMC2	MAP3K5	MUS81	FAAH
FLNC	DUSP10	BNIP3	LRRC75A	NPR2	ACY1	PIGL	AGO2	ALAS1	RCBTB2	ZNF786	PSRC1
EVI5	RHOU	PRUNE1	CDK18	OSBPL6	TRIM35	SYN2	TMEM165	UCP2	APBB3	POLN	TNRC6C
ZNF594	RABGAP1L	TMEM205	MZF1	SPATS2	GADD45B	ZKSCAN4	DSC2	RRM2B	SCLY	NEBL	MYRF
GOLGA7B	STK26	IQCD	FAT1	PLIN2	ATXN7L1	PTCH1	USO1	TMEM120B	RBAK-RBAKDN	LYPD1	BICRAL
GPER1	CAT	KCTD11	KLK5	DNMT3B	CACNA1H	CNTD2	ENOX1	C1QTNF6	LZTS1	CAMK2D	PBXIP1
PGBD4	CCDC92	ROCK1	LRMDA	TMEM158	PKP4	ZNF724	HEBP1	AKT2	COCH	NAPRT	MRPS10
RNF144B	CORO2B	FOSL2	PBLD	EML1	IRS2	ENTPD7	IMMP2L	ZNF165	ABAT	PTRH1	LPGAT1
CYP27B1	OSBPL8	KSR2	EPN3	C11orf68	ARF3	PIR	GAK	CASTOR2	GPR161	MFSD9	FZD7
ZNF513	JCAD	CCDC28B	DENND5B	EEF1AKMT4	BCAS3	TOMM40L	OXLD1	IL22RA1	GLCCI1	SLC20A2	PTPRJ
TSPAN14	PER3	NDUFAF3	NRL	EIF4EBP3	TNFSF9	MPP7	RALB	CYSTM1	TFR2	HGH1	DKK1
GNAI1	PARVA	GNAI1	COL6A1	PITPNC1	RASSF7	GREB1L	SGPL1	ITGB1	LHX6	TMEM41B	IL17RE
MC1R	IRS1	SLC30A4	FUT8	QTRT1	IRF5	CNP	CTTN	ZNF484	APLP1	FOXO3	MACF1
C19orf33	SLC22A18AS	FOXO4	SLC16A5	SBF1	MLST8	SLIT2	VPS13C	HIVEP2	HOXC13	DPM3	SHROOM3
GLT8D1	ENTPD2	ZNF827	STK26	PPM1N	GNAI2	LIN9	MRE11	INTS8	STOM	MMD	IQGAP1
MSX1	SH3D19	LAMA3	SUSD4	SMC4	SIK2	VRK1	ZDHHC9	SCD	SHROOM3	SHB	CUL4B
RNF182	B4GALNT3	CKLF-CMTM1	PANK1	SIX5	RBL2	RPL34	CYP4F3	CMIP	MAGEA3	ITGB4	PAG1
CCDC103	USP24	ARHGAP26	PARP16	FOSB	PREP	SAC3D1	DOCK9	PTRH1	SLC43A1	SLC45A1	FAAH2
PSMD1	SMTN	ARMC1	CCDC149	ANKIB1	LRRC42	MSI1	SERTAD2	CAB39L	OLFML2A	GNL1	F2R
LAMP3	ALDH1A3	CAPS2	CACFD1	WNT16	CTDSPL	FSCN1	NPDC1	PAX8	ARHGEF17	RILPL1	PPIL2
PCID2	PANK1	SYNJ1	CDC42BPA	TRMT12	MFSD12	CENPS-CORT	HSPA5	FRK	ARAP3	ZNF519	CDON
JMJD4	SULT1A1	PAOX	TIGD6	CENPF	CYB561	CDKN3	SERINC1	CEBPD	MMP14	IGF1R	RAD17
KLF9	CASD1	ETNK2	CHST6	TLL2	USP4	TJP2	ZNF425	PLEKHA2	ARSG	SLX4	CPS1
S100A3	NECTIN4	TUBA8	NR2C2	FGGY	GJB5	MNX1	IDH3A	ARHGAP12	FOLR1	ALKBH7	CNOT10
TBK1	LYNX1	GGH	JAK1	ABCA5	MAPK3	BBOF1	FZD1	PFKFB4	TIAM1	RELB	UTP23
SLC4A7	ZNF100	ASPH	P3H3	FNBP1L	ADPRHL1	ZNF827	TRIM7	PUS3	TDRKH	TAF13	KCTD20
ESAM	ABCC3	TRIM24	DMXL2	WLS	C1RL	MISP	SAMD11	IFT43	IRS1	MSANTD3	HAPLN3
KATNAL1	FBXL17	CYP27B1	RABGAP1L	BAZ1A	TIGD5	PER1	NOD1	C11orf68	UNC5A	MRPL53	CHML
TRPM6	CEMIP2	NR5A2	SNED1	FZD3	TRAPPC9	TLE1	POP1	SMC6	MYL9	FDFT1	LIMS1
TMEM171	RBKS	NPR2	APIP	HOXA10	HECTD4	STIM2	TOR2A	COA3	COL12A1	HEMK1	TMEM64
GADD45B	TNRC18	SLC44A2	COASY	PCDHGA9	OGDH	TXNRD2	ATP6V0A1	DYNC2LI1	DDIT4L	PCMTD1	UTRN
ARHGAP26	LRRN2	ACAD11	SCRN2	TGIF2	TEAD3	RPP14	ESYT2	EVA1C	ISL1	HEYL	RCN2
STON1	OPLAH	CPE	ITPKB	MCOLN2	TLNRD1	C11orf98	GAMT	FBXO32	HPSE	SUMF2	DCTN3
LAMC1	APIP	TANGO6	FBXL17	EML6	GPC1	ANP32C	CLN5	FGFR4	DHTKD1	ZKSCAN5	CKAP2
RAET1L	DAGLA	PLOD2	STMN3	ZNF516	PPP1R13L	ACVR2A	PCNX3	ULBP2	SPIN2B	DHRS7B	ING4
SPATA24	SLC6A20	CNTNAP1	C19orf25	GART	RIN3	WRAP53	ATP13A3	FBXO36	LRG1	SPG7	TNFAIP8L2-SCNM1
TLR1	PLXNB1	EHBP1	PRF1	MYCL	UBOX5	MRPL36	MAGED2	GEM	WIPI1	SDHAF4	EPC1
BNIP3L	NUDT8	LAMC1	BCAS1	TCEAL4	TANC1	STK36	TSTD1	FPGT	CDK18	SERPINE2	GDE1
EHBP1	ADAMTS7	RHOF	ADAM19	RNF144B	PRH1	ZNF8	C1GALT1C1	FRMD5	VWA5B2	FBXO36	ASAH2
MMP25	NTN4	ZNF350	PCBP4	CENPV	ITM2C	MTRNR2L2	CYFIP1	LRRC41	AIP	ZNHIT1	EIF2AK2
PHF7	UNC5B	LRRC8D	NPHP3	CCDC77	C9orf16	RRS1	MAP3K9	JMJD7-PLA2G4B	RYR1	DHCR7	KMT2B
DNAJB4	EML3	KCNAB2	PKIB	CRAT	MEF2D	ZNF525	RFX5	USE1	NOTUM	TNS3	GPR137
SYP	KIF21B	LAMP3	MACROD1	LIG4	TMBIM1	TWSG1	GSTO2	ACSL1	SIX1	DIP2C	ERCC5
APOD	MZF1	MEST	ENPEP	KIZ	MGAT4B	SMAD9	PSAP	SLC26A6	CAPN6	NABP1	CREB3L4
GFY	ITPKB	RAET1G	HES1	RNF122	NFE2L1	NUCKS1	MYL12A	FOSL1	DYRK3	MFSD11	GPT2
DDX60L	CDK18	CASP8	HSPG2	WBP4	CTSA	SNAPC2	PSME2	WNT16	ARHGAP42	JUNB	MBNL2
PIM1	IRF2BPL	TMEM121	SLC25A6	CLEC11A	GAA	ZNF143	LYSMD2	AK6	ADAMTS14	RCL1	B4GALT5
WSB2	GPR161	CCDC85B	CSGALNACT1	SSBP4	SHB	PIMREG	TMEM101	AMMECR1	HOXB7	FRMD8	ZYG11B
TMEM151A	KCNC4	ANXA3	COMMD8	PCF11	TRAK1	CYP20A1	SIK2	JMJD7	SH3PXD2A	FAM83H	IQCB1
NFIL3	PKP4	DHRS7B	CECR2	CRY1	RNF130	HOXA11	CASTOR2	MDFIC	HSPG2	FOSL1	ZSCAN22
RINL	CEP290	RNFT1	JAG1	LUC7L3	TBC1D2B	C7orf26	UCP2	GPAM	CD33	DLGAP4	BTF3
KIF14	LIN7A	CASZ1	PCSK6	ZNF280C	FN3K	ANKRD13A	SCFD2	SERF1A	HOXC10	B4GAT1	APBB1
PTPRM	ZNF396	ICAM5	FPGT-TNNI3K	ZSCAN2	TPGS2	SMPDL3A	MED6	RBP1	SMIM3	LPAR2	YOD1
NDUFAF3	NR1D1	HMMR	IRF2BPL	CABLES1	SNTA1	COA4	KCNQ2	GADD45B	WDR81	FLNC	PEX14
UBE4B	HTR7	MLH3	MARCKSL1	NSMCE2	CGN	CEP120	PCNX1	AP4E1	LAMB1	ADAT3	PNPLA4
CDS1	MACC1	TLR1	EPPK1	TBPL1	MRVI1	CCDC77	REEP6	ZDHHC24	BANK1	IBTK	COQ10A
ELK3	RABEP2	ULBP2	CDKN1A	C12orf60	GPR137	TROAP	TRAM1	EPB41L1	APOLD1	ARL6IP4	ELF4
CNTNAP1	ABCG2	UBXN8	RBCK1	CWF19L2	SWI5	MSX2	PIP4K2C	DRAP1	MFSD2A	PLEK2	WIPI1
WLS	ERV3-1-ZNF117	UBE2W	TCF12	UBE2E3	UBFD1	WDR74	SLC9A7	LRRC6	ABCG2	DBNDD1	LMNB1
ZP3	MORC4	MTDH	SULF2	AGPAT4	STIM1	HMGN1	PDCD4	MYO15B	ID3	ZBTB17	LNPK
SIRT5	STMN3	SLC49A3	TMEM159	VRK1	PELI3	IFT57	MAPRE3	MIB1	TMEM200A	DDT	SP4
MN1	EPS8L2	NADK	CREBZF	PSTPIP2	TMEM219	DPM3	ZDHHC18	DHCR7	PLLP	TMEM160	ING3
BCL11A	PLA2G7	BCL2L11	C3orf18	MOSPD1	SELENOS	MTAP	ZZEF1	ZNF37A	LIMS2	PEF1	DCLRE1C
CCDC85B	FLNB	AFMID	MKNK2	WNK1	MYH9	ANP32A	GAB1	BIRC2	RASA4	CEP170B	PSIP1
SLC43A3	SUSD4	TMEM214	MXD4	SEPHS2	DET1	PQBP1	SLC10A4	SNX7	SYDE1	TRAPPC2B	TANK
COL4A5	TBX3	CCDC88A	SCAPER	HYLS1	IGSF3	TRIM6	PIGT	GPAT3	ITPKB	YIPF2	PXYLP1
RAB37	NUP210	SPOCK3	ETS2	VASP	PHLDA2	PITPNC1	MDFI	SERTAD2	PLK2	BAIAP2L1	SPRY4
MEST	SLC12A2	KANK3	ADGRG1	ANTXR2	CHCHD7	SCRN1	VPS28	USP15	ARV1	NUDT16L1	FANCL
ROCK1	SLC9A2	KRT5	HSPB8	EHBP1	SNX24	PACSIN3	ZDHHC7	SLC20A2	FMNL3	UBXN11	TMA7
N4BP2	RNF144A	ELK3	RGL3	PCM1	ADAT1	ABRAXAS1	FRAS1	ACTA1	KAZALD1	TJP2	POLK
TRIM6	FAT1	SYT17	SP140	EEF1AKMT4-ECE2	NFKBIA	CD3EAP	RAI1	CDC42BPB	FOSB	PLEKHA2	CFL1
AGPAT4	SNED1	DDIT4	MEX3A	PLEKHA6	ADORA2B	AK3	KIF13B	CFD	TOM1L2	ASAP1	SIRT5
CTRL	VASN	SLC2A3	NUBPL	GCH1	PRRC2B	SCAND1	TMEM38B	EVI5	BCAR3	SGTB	KIF20A
SP9	TLE2	JUN	KANSL1L	SLC16A1	NFE2L3	ATF5	SLC16A3	SLC25A10	GOLGA8A	FGFR4	ZBTB20
NEMP2	SLC4A3	CEP55	SELENOH	RNF223	ATP6V0E2	CDC26	NFE2L3	B3GNT3	ARHGAP18	CLK3	LGR4
TMEM158	PLEKHH1	CCDC110	TEAD2	FRAT2	PKN3	USP42	MFSD10	CCDC71L	TRIM38	SRP68	COQ8A
QPCTL	BCKDHA	MFSD13A	PDE11A	OSR2	BLCAP	PCF11	TRIM38	HSD17B7	GBP5	VWA1	ZNF354B
ANO1	ETAA1	RNF5	UNC5B	ZNF827	MAPK12	ZNF282	CENPO	PIGL	BVES	PTPRE	PRAF2
SMTNL2	OLFM2	ACSL5	SAMD12	RINL	ZBTB4	APBA3	IQCE	DISP2	CAMK2N2	SOX12	CCNQ
FERMT2	RIMBP3B	KATNB1	ZSWIM4	IRX4	STX2	KRT80	PCGF5	EPN2	SLC1A1	MED31	EDNRA
TROAP	GABRG2	DNASE1L1	SSH3	TFPI	CAMTA2	ATXN7L2	SAMD8	FGFR1	FMO4	SPSB1	ZNF502
CDCA3	RIMBP3C	GDAP1	TNIK	RDH10	FBXL16	FGFR1	TOGARAM1	FADS1	RIBC2	ZNF408	TAF1
CALB2	DNMT3A	PTPRH	HUS1	RALGPS2	UNC93B1	HSD3B7	SNRNP25	ATAD3B	DUSP6	TBRG1	TAOK1
CCDC88A	H6PD	LAMB2	TMSB15A	NPIPB3	DGAT1	ABHD14A	COPB2	CD276	SLC25A48	RUVBL2	BCL9
UBXN8	CBFA2T3	WLS	TNNC1	F2R	TEP1	MID1	SYT7	LRRFIP1	SCARA3	KXD1	STMP1
DGKE	MBD5	TIGD1	ANTXR1	TTC25	THTPA	WNT16	ENTPD4	SLC25A1	RPS6KA2	UBN2	FZD4
JUN	ZNF280D	CDS1	ALDH1A3	KDM7A	METTL4	ABCC2	PKP3	PAQR5	CAMK4	PMAIP1	LCA5
PMP22	ZNF680	SLC38A2	ARHGEF9	DOCK4	WDR7	EEFSEC	PTRHD1	LPIN1	SLC1A4	SYT13	FBXO48
CREM	RALGPS1	GADD45B	ARMC5	DEPDC7	FKBP1B	RNF125	NECTIN2	EFCAB2	SLC1A3	MVD	PSMA7
SLC43A1	PIK3R1	RNF182	IGF2	RGL1	TMEM165	CNPY3-GNMT	NPTXR	BBX	IL18R1	ZNF543	NAPEPLD
MFSD3	NUBPL	PBRM1	RALGPS1	EEFSEC	SH3BGRL3	ZNF688	PPM1F	PGGT1B	CDC25C	KCTD5	MDM1
GDPGP1	FSBP	ZNF34	PRRX2	SLFN13	FAM160A1	SULT2B1	ABHD17C	CTH	PRAF2	CPSF1	ZNF564
GLI1	NFAT5	SYTL3	PCNX2	KPNA5	KIAA0556	NFATC1	KAT6B	ZBTB25	DGKE	BRMS1	NPC2
DHRS7B	CCDC149	SLC4A11	LOXL1	TBL1XR1	TMEM214	TGIF2	AMZ2	ASPH	KIF5A	ABHD8	MTURN
ARHGEF28	PARP16	RAP1GAP2	SULT4A1	NPNT	KANK2	HTR7	RIPK1	TCEAL4	ZNF443	DOK1	ELP6
SYT17	PPP1R37	ATP8B3	SCARA3	ZNF789	PDE6D	MRFAP1L1	MFSD14C	BSPRY	MXD3	B3GNTL1	PCNX1
CDA	FOXO6	TMEM123	PBX3	BBS10	PTPRE	FLAD1	SLC44A2	DEPTOR	FAM111B	STK32C	SCD5
MBNL3	CRLF1	CFD	ANKRD6	FLNC	JAG2	MRPS18C	GTF2H3	GPAA1	ARL14EPL	SIAE	NOD2
RASSF2	ZNF177	YPEL2	CCDC69	PPP1R35	CAPNS1	NKIRAS1	PI4K2B	HMGCR	CHRM4	SLC37A1	TACC1
PLIN2	TTC37	SERPINI1	RBM26	IP6K1	DPH6	SPIN3	WDR72	P4HA1	PER3	NEK6	MYO10
PRKDC	ENPEP	KIF14	SULT1A1	GXYLT2	CLN5	CPOX	HECTD4	CTBS	EXPH5	UBE2E1	MYB
TBC1D19	FOXD3	BBC3	CAVIN3	ZNF510	CDC25C	BAMBI	TNKS	PSD3	SLC6A9	STC2	MACROD1
PIP5KL1	ARSG	STARD8	CDK14	DNAJC2	NLRP1	NFKBIZ	RUSC2	DLK2	DPYSL4	ACOT11	ELL2
LRRC73	NIPSNAP3A	PCOLCE2	SARDH	SAC3D1	ACTR1B	HYPK	TRIM35	NADSYN1	CAMK1D	KCTD11	LRRCC1
GLT8D2	FAM102A	ARNT	MTMR8	RFX3	SDR39U1	CCDC157	MFSD14B	PALM3	ZNF85	GMPPB	METTL15
RIOX1	ACE	ROBO3	SYNC	SLC9A1	EIF4E3	LRFN4	USP38	SNAPC3	SYT1	TUBB2A	PHLPP1
SLCO4A1	FUT8	STOM	ZBTB43	FASTKD2	ANAPC15	UBTD2	RETSAT	PCDHGC5	OPN3	ZNF597	PECR
SPOCD1	ETS2	DCAF4	FUCA1	CCDC50	LIMK1	VPS37B	STAT2	C4orf3	PELI2	TGFBR3L	NRG2
RNF223	SCRN2	COQ8A	FBXL2	STXBP3	NCS1	CENPV	TM7SF2	MSLN	TRPV4	COQ8B	E2F5
MTDH	AK9	PAPSS2	SMTN	AK6	ARAP3	AKAP8L	MYO9A	ANKRD37	ARHGAP29	LAD1	NDUFS1
C11orf68	CABLES1	SLC27A3	ZNF738	MARCKSL1	CBWD3	TCEAL8	AIDA	TAF13	INPP4B	TBC1D19	LIX1L
PLCB4	ZSCAN31	UBE2L6	BCL7A	POR	CDS2	IFIH1	TRERF1	STOX2	F3	AP5S1	ZRANB1
ROBO3	GATA2	SH2D2A	CDC25A	CBX2	GSTK1	TMEM107	SPACA9	NAPRT	DGAT2	TAB3	BIVM-ERCC5
GPR3	KIAA0232	C11orf68	ULK2	EEF1AKMT1	KRTCAP3	PLCH1	YTHDC2	MFSD3	HR	DRAP1	ANKRD18A
SNAPC5	SOX4	CDKL1	TBX3	ACSL1	SPIRE2	NSMCE2	GABRD	TMEM135	PC	APPL2	CYB5B
ANKRD34A	ZNF708	GTF2E1	MAP3K9	E2F5	FAM161B	RTKN2	STXBP1	WWP1	ALDH1A3	C2orf49	PPP2R3A
ILDR2	CHST6	NR3C2	ENTPD2	NASP	LGALS3BP	HSD17B6	DDOST	PCDHGA3	SAT1	SYNE1	LYPLAL1
STOM	DDX58	PAG1	NXPH4	UBE2L6	NUDT22	GTF3C5	GRINA	PCDHGA1	CST6	P4HA1	ZSCAN2
RHOF	YPEL5	FER	CASD1	DAB2	TMEM9B	CISD2	UNC13A	PCDHGB1	TLR3	PCSK9	FAM217B
GRK5	PLPPR4	PRPF40B	C12orf57	SPPL2B	GNPTG	PSMC5	B4GALNT1	RSF1	CNTNAP3B	LTN1	CELSR2
ANKRD24	HES2	TMCO6	ARID4A	ZNF19	TBC1D8	KIF21A	ETNK1	TATDN1	FAT4	MSMO1	CILP2
FAM216A	ZNF888	MBOAT2	DHRS4L1	CCAR1	SRPX	CKS1B	ARFGEF2	PEMT	RALGPS1	ALDH2	ARMC2
PNMA1	GBP5	NFIL3	FLNB	PKIA	G6PC3	HSPH1	CCNI	KIAA1217	FOXC1	RNF19B	ABCB10
TSC22D1	ZNF117	ADAMTS16	NFKBIA	TFDP2	BORCS8	THAP10	UHMK1	COX20	MRVI1	CAVIN1	TMEM175
RNF5	ANGEL2	BST2	ZNF710	WDR25	TP73	MYC	EFCAB11	SLC37A1	SYNE2	DNAJC18	TRERF1
RELL2	KCTD15	GJC1	RHOU	KIAA0100	ORAI2	ANKIB1	TMEM248	WDR89	ZDHHC2	DDTL	CTR9
S1PR5	E2F7	KAZALD1	NUP210	C2orf76	ARRDC1	LUC7L	ZNF664	TMEM123	APOBEC3F	ATP6V1F	SOWAHC
ERICH5	OBSL1	ALCAM	LRRC37A2	USP47	HEYL	CCDC130	ACTN4	PCDHGA7	FAM214A	PLTP	PDPR
SLC26A4	TNFAIP2	PRKD3	MB21D2	ZNF587B	IGFLR1	CDKN2A	RHOA	PCDHGB5	IFI6	ACTB	ZDBF2
FAM161A	PITPNM3	RAB3D	ZBTB46	IMPA2	TOR4A	CBX1	GNB2	PCDHGC3	SNTB1	LAMB2	TMEM129
BTN3A2	MINDY2	SMTNL2	PHLDB2	CIP2A	KCNK5	NR2F6	TMEM199	PCDHGB4	HIVEP3	MRPL34	MEX3A
PADI2	GRAMD2B	NCKAP1L	TCFL5	RBBP6	WDR81	CCDC138	HACD3	AKAP12	CCNJL	C12orf43	DTX3L
HSD17B8	AJUBA	CDKN2D	AAK1	MED20	ACACB	TRIM16L	RXRA	PCDHGB2	CSF2RA	ACBD7	DENND5B
ABHD3	LOXL1	TROAP	CADM4	ZNF22	XRCC4	CDKN2AIP	PI4KA	NKIRAS1	NECTIN3	ARHGEF16	UGCG
MXI1	LYPD6	DISP2	RC3H1	ATAD3B	CARD19	SPATS2	TMEM241	FAHD1	APOBEC3B	PDLIM7	TMCC2
PSMA6	ZNF45	DAGLB	CEMIP2	PCMTD2	MYO18A	TAF7	WDR1	CYB561D2	AXIN2	ZHX1	RAPGEF2
CFAP43	STX3	YIF1A	MGST2	TRAF3IP2	CTIF	ERC1	MCFD2	WASHC5	GABRG2	PLEKHG4	COL12A1
PON3	SULT1A4	ATP6V1C2	TESK1	ABHD6	N6AMT1	EEF1AKMT4-ECE2	KRTCAP3	PRAG1	ANO1	NKAP	ZFAND2A
CCDC110	PHLDB2	PDK1	IFITM1	STYXL1	DDB2	FLCN	TCTN3	CLEC11A	PRKAA2	CYTH1	KHDC1L
PMEL	TMX4	TESMIN	SLC12A2	RNF125	BCAR1	LRRC49	EREG	PCDHGA5	HNF4A	CCDC157	EHBP1
F3	SULT1A3	ITPR1	RPH3AL	ICAM1	DNAJC4	TIMM9	DPY19L4	TCP11L1	APOBEC3C	IMP4	SORT1
SLC39A3	PDE7A	PSMA6	DBP	AKAP3	CDON	MTA3	VPS54	YIPF6	MILR1	THOP1	MTERF2
CCDC28A	UNC5A	DUSP19	SSTR5	PPIP5K2	AGFG2	TADA2A	MBNL2	RIPK2	CASP4	HEXIM1	KANSL1L
ACAD11	ZMAT3	MET	SIGIRR	ZNF814	JOSD2	MAGEE1	TAF1	PCDHGB6	PHYHIP	FAM13A	RAB27B
ZNF827	DUSP22	IFNGR1	ZNF558	NANS	RALGAPA2	TES	MGAT5	PCDHGB3	TNIK	SCD	LAMB1
IQCD	EPPK1	THOC6	MKX	SRD5A3	C19orf25	SPA17	AGAP3	ELF1	CEMIP	HDDC3	PHLDB2
SYNJ1	PTH2	PROM1	MLLT6	GDPD1	MED10	BLMH	EHD4	RPS6KA4	TGFB1I1	S100A6	TMEM117
DMAP1	GTF2IRD2B	DMAP1	PLEKHJ1	AK3	CACNA2D2	MAPKBP1	SLC38A10	PNPLA4	SESN3	PPOX	ZNF816-ZNF321P
TNNI3	SLC25A29	PNMA1	PTMS	TMSB15A	GALNT2	PNRC2	EPN1	STT3B	GPR143	FAAP100	CGRRF1
SNAPC1	ABCA2	PURB	BCL7C	PNRC2	MANEAL	CEP19	POLA2	PCDHGB7	NR3C2	PIM3	ATG2A
ATP8B3	TMEM191C	ADGRF3	SPIN3	BEX2	WDR13	CINP	PEX12	CTRL	KRT20	ALAS1	VWA5A
TMEM179B	TEF	DYRK3	ARID3B	BLMH	IRF1	DYNLT3	PPM1L	DSCC1	TCEANC	STK16	DUOX1
NUDT6	TP53I3	QKI	RAB3B	TRMT10C	TINF2	SAMD5	ADAM9	NCKAP1	TGM2	RCAN1	OAS3
SFR1	MCOLN3	PLEKHH2	EPHA4	TAF7	WNT3A	TBCC	SHB	PCDHGC4	GPC3	EIF4H	TIAM1
C17orf67	PKIB	NMRAL1	PXDN	ASB9	SMPD2	WASHC3	EFR3A	CCDC91	PLPPR4	SERTAD1	CDKN3
TUBB2A	RAI1	TXLNG	NPIPB3	EIF2B5	MICAL1	ADGRG6	ANXA4	PCDHGA11	HOXB9	ASB14	KLHL15
TRDMT1	TM2D3	SCHIP1	IRS1	FAM193B	SEMA4F	RGS2	RIN1	PCDHGA6	KLRC2	AIFM2	KAT6B
RGS16	B4GALNT1	IQCJ-SCHIP1	MMD	PER1	ANKRD11	ZNF480	RMND5B	MAPK13	KLHL35	GTF3A	EXOC5
NXPE3	FAT4	C1R	TPGS1	ZNF114	SGPL1	TAF5	COX6A1	SMIM14	APOBEC3G	AGRN	KLK5
QKI	MCM9	LRRC23	MELTF	RAP1GDS1	ESYT2	PPAN	TMEM185B	FLNC	ETV7	WSB2	ZNF827
ZNF485	PCNX1	TNKS2	AGAP3	PCDHGA10	PACSIN2	PFAS	PECR	USP45	ARHGEF6	BOLA2B	FAS
CHD8	STAG3	SLCO4A1	ANKH	EZH2	IDH3G	CEP131	DSG2	TAX1BP1	LGALS9	TUBB3	DYRK3
MFSD13A	PKD2	ASPM	ZNF254	STXBP4	ZCCHC24	TRIAP1	ZSWIM8	TMEM120A	CASP10	MPG	PLK2
SPTBN4	MVB12B	JADE1	TP73	GEM	FZD6	CWF19L2	MAN2A1	RIOK2	SCN2A	SDHAF3	ZNF75D
TRPC1	STRADB	COL4A5	ANGEL2	MTAP	GJC1	C1orf131	SELENOS	IMPA2	SYTL2	SLC36A1	SFT2D2
LONRF3	ZNF85	GALNT6	SLC38A10	DSE	LRP10	PAIP2	FAS	HGH1	NCKAP1L	CAMK2G	BCAS1
C3orf80	SELENOO	PMP22	PHLPP2	POU2F1	RHBDD2	ANGEL2	RETREG3	INSIG2	PLA2G7	EXTL3	MZT1
MST1R	SRPX2	TEDC1	PKP4	DDX10	UXS1	BAD	ZNF354A	UBE3D	GLB1L3	MROH1	PTPN14
TRIM6-TRIM34	TRIM44	CC2D2A	H6PD	HSDL2	SLC35C1	CTH	ARPC2	MTERF1	SLC2A3	PLEKHG5	USP22
GTF2E1	MAGEA6	HR	RYR1	POLR3G	EZR	ANKRD42	TEF	TBL1XR1	HOXB6	CNKSR3	RYR1
TMEM121	ZNF816	CDCA3	SYNE2	FHDC1	TMBIM4	OSBPL6	SCML1	PCNX2	HLA-DPB1	DMKN	GPATCH11
TMCO6	DMTN	NFATC1	PLEKHG1	NANP	GBA	C1orf35	DHRS4L2	TRIB1	SLC16A6	STX4	ARL8B
MET	CBX6	NUSAP1	SELENOO	CCDC88C	KYAT1	SNRNP70	RNF14	NRDC	CNTNAP3	UBQLN2	REL
PRSS3	BCL7A	MMAA	TNFRSF21	UPRT	ACTN4	SGTB	SNX9	CNPY4	RUNX2	VGLL4	RAB5B
WDR54	E2F5	ELOVL1	TPK1	SDHAF3	CELSR2	UHRF1	FBLN1	ALOX5	DYNC2H1	NDUFB7	ZNF483
GUSB	PTK6	BTN3A3	VAMP4	TCEAL9	GAD1	GIN1	YIF1B	PIM1	SUSD2	UHRF1	NOD1
EML2	MGST2	MGAT2	TMX4	LUC7L	CDH3	DLG4	PXN	KDM5B	NR2F1	MVP	BMP4
CACUL1	MLYCD	TSC22D1	MCOLN3	PLD6	CHMP4B	SMIM10L1	PRDX5	SYDE2	TEX19	ANKRD42	MBNL1
TMEM214	MKNK2	FOSB	SMARCD3	MAP1A	TNFRSF12A	SPAG5	DHRS4	SHANK2	KIAA0040	C11orf98	PEG10
ZNF438	NDST1	THEM4	CAMK2D	ARHGAP8	MROH8	PPAN-P2RY11	C15orf41	EEF1AKMT4	ACTN2	SLC39A4	DHRS3
SLC30A4	MMP17	TES	ABCB6	FGFR1	EPHX2	COPS7B	MROH1	ZRANB2	EHF	WIZ	SLC16A9
THOC6	FAM189A2	MC1R	BHLHB9	WSB2	C19orf33	C16orf87	ZNF544	SPEG	NR5A2	MRPS36	SLC27A6
C2CD2L	TNFRSF21	RRP9	CD163L1	ANKRD13A	VAV2	TRIM16	ITM2B	ESF1	SKAP1	RRAGD	FOXN2
TNKS2	ARID3A	HSPA4L	HCN4	ZBED5	RAD51D	STYXL1	GRN	TJP2	PDLIM5	SUMO3	SLC7A2
GMPR	TMC6	CYCS	EGR1	SPDL1	ASL	MTERF2	TMEM87A	USP43	BAMBI	SHARPIN	GZF1
ADORA2A	VEZF1	CTH	PLEC	C6orf120	KIAA0319L	WBP4	TMEM19	SSB	BDNF	TNS1	MIS12
HMMR	ZNF248	LPCAT3	BZW2	ZSCAN26	SPNS2	TRIP6	PMP22	AGGF1	CYP24A1	P4HTM	CDC42BPA
AIP	MFSD14C	SNAPC1	ZNF699	ZNF440	EARS2	BANP	GLCE	JUN	F10	PVR	TMEM106B
FRAS1	AHNAK	RAMP1	DNPH1	TTLL5	PEX12	ARHGEF26	YAP1	BIN3	ADGRF1	C9orf116	PDK3
SPOCK3	ZC3H6	TRDMT1	SCD5	HSPB8	TUBG2	ASPH	ADAP1	PITPNC1	SPARC	COQ6	NEK7
ABRAXAS1	CTSD	WASF1	THAP5	THBS1	POMT1	NAV1	CCDC127	ANAPC11	ANK1	CTU2	BTN3A3
SAP30	AXIN2	CACUL1	ABCC3	GRAMD2B	CORO1B	TET2	GLB1L2	ZNF558	HOXB4	SIRT4	CUEDC1
CASP8	TNRC6C	SLC16A13	TRIM7	ALKBH8	ENPP4	EZH2	INPP5F	CYP4V2	HOXB8	CHCHD5	CBFA2T3
SLC27A3	HINT3	SEMA3C	B4GALNT3	L3MBTL3	KIFC2	CCDC88C	MPP1	DCAF13		DSC3	MKX
ESPL1	GULP1	F3	RNF144A	CSTF3	ANO9	MVB12B	RALBP1	DGAT1		RABAC1	ZBTB39
ISCA1	RAB43	SKA2	CRY2	RHNO1	PAQR5	HTD2	ZDHHC20	SERPINB5		CDC42EP2	FN1
GOLGA8A	HNF4A	ZNF485	ASAP2	ZFR	HNF4A	PIK3CA	MDM2	PLA2G12A		DISP2	ADGRG5
PEAR1	SOS2	FAS	PPM1F	TRNP1	DDIT3	DNAJC18	PGM2L1	GAB1		IFFO2	FANCB
NANS	SH3YL1	MITF	POLR1D	ZNF121	CHST11	TSTD2	MED18	FBXO30		VGF	HACD3
PHF20L1	ASAP2	SLC43A3	GPRASP2	NR2F1	FUT2	RNMT	SGSH	NUDT4B		CHPF2	FITM2
SWAP70	LIMCH1	CTC1	PTK6	WDR91	DCAF11	PANK3	CXorf38	FYTTD1		CHTOP	TGFBR3
CLEC11A	PHF14	SUGP2	EIF4E3	SBK1	AKR7A2	TOX4	ZNF358	KLF6		SERTAD2	DCAF11
TMEM17	MACF1	ABCA3	RHOB	RAB9A	HERC5	ANKRD9	SLC9A6	DPH3		PPP6R2	ACACB
HR	MAP2	TOR1B	CBX6	PSMC5	CERCAM	BPTF	SP5	DVL1		MEGF8	POC1B
CTC1	MGMT	SGMS1	CTSD	STPG1	GRK5	RTL10	ALG1L2			NPNT	FAM111A
PTP4A3	KLF5	TUBB2B	TMEM132A	PNN	UNKL	ECH1	RHOBTB3			DLAT	EMB
FGFR1	SSTR5	N4BP2	CGN	ASPH	SNX1	COL1A1	NCOA4			ZNF668	SGCB
MDFIC	ZNF84	ATP2B4	IRF9	FAM117B	PPM1F	WLS	ALDH3A2			TRIB1	ALDH1A3
RRAS	FAM168A	CSTB	ZSCAN2	ME2	HPCAL4	NLRC5	NAGA			DLST	ARNTL
PPM1J	UBOX5	PTTG1	BCKDHA	CENPU	TSPO	SFPQ	AK4			WWC1	TMEM200A
CEP55	CYP1A1	KIAA0586	KIAA0232	KDM5B	ALDH5A1	TADA1	ESRRA			CERCAM	TRIM14
SRGAP2B	HID1	MST1R	ZNF618	DUSP2	REEP1	NRGN	ANAPC15			CRB3	ICAM1
TANGO6	NCAPD2	FGFR1	NFAT5	ENC1	MR1	DAZAP1	CRABP2			PITPNC1	B4GALNT3
ZNF239	SELENOP	UBE2D4	ALS2CL	ZNF250	NT5DC2	GTPBP10	CRYL1			TCEAL4	IL10RB
NR5A2	RBCK1	EML2	TNFAIP2	PQBP1	GRAMD4	CCDC136	MDK			CHMP1B	GPR161
RAB3D	SEC14L2	CKAP2L	DNAJC13	ZNF816-ZNF321P	TMEM64	SH3RF1	G6PC3			OGFOD2	MTUS1
C5orf34	AGAP3	CCDC112	SESTD1	ZNF530	ATP2A3	SMARCC2	ATR			CCNY	IL17RB
BCL6	SHISA8	HMGN3	MAFK	PIM2	OAS3	ZNF274	AKAP11			STN1	FKBP1B
IBTK	GALNT12	SLC2A11	TSPAN1	GALNT1	KDELR3	C16orf91	PREP			FAM83B	KIF27
STK33	KLHL42	TAGLN	CA11	GEMIN6	GSTM4	RRP9	BCAP31			ZNF440	KLF11
ZNF546	FXYD3	PCDHGB2	FAM219A	MSI1	GABRD	C22orf34	YOD1			UBN1	FAM13B
OSR1	MID2	PRSS16	ABHD17C	SGPP2	ECHDC3	TDP1	IRF1			MSLN	PARP12
CUTC	ZFHX4	GLT8D1	FAM89B	POC1A	FBXO25	KLHL7	POFUT2			RCOR2	FGFR2
LOXL3	PDE9A	ENOX1	ASTN2	BDH1	MAPK8IP2	MAST3	ALDH6A1			RBPMS	SYDE1
ASNS	PLEKHG1	MMAB	PALM3	UTP6	GPR161	BCAN	IFRD2			TSPAN17	FBXO33
KATNB1	IFIT3	SPDL1	HID1	TRIB3	GAMT	EAPP	ADAT1			ALDH1B1	APOBEC3D
GXYLT2	MYO5B	HBEGF	ATG10	DYRK1B	TMCO4	CTU1	TMEM131			POLD1	CMC2
UBE3D	EPS8L1	SAP30	WIPI1	MTFP1	SLC45A3	LIG4	RABGAP1L			EFNA4	CCDC68
NR1H2	TRAPPC2	COX15	PARVB	TSPAN13	PNPLA4	NAA16	ANXA11			INO80C	ATP6V0E2
HES4	TTYH3	TMEM158	S100A5	DNAJC6	SP6	MARK1	TRAPPC11			DDIT4	DHTKD1
GGCX	CALCOCO1	CHST11	OSBPL7	IFT43	GPAT2	ZBTB48	VEZF1			NDUFB2	NIPAL1
SKA2	ADCY6	PLEKHN1	IQCG	NFXL1	SIGIRR	MRPS34	ZSCAN32			COX20	ATP8B3
SERPINI1	TMEM132A	TMEM179B	ZDHHC24	NDUFA5	TPRG1L	OGFOD2	GPAA1			TNFRSF10A	FAM107B
PLOD2	CDKN1A	PMEL	SOCS3	LPAR3	MST1R	CREB1	NBL1			ZNF282	STOM
GPD2	EPAS1	PADI2	CORO2B	TSPAN14	HYAL3	CENPU	FANCL			PLA2G12A	RBL2
NIPAL3	HUS1	B3GNT2	TRAPPC2	MPHOSPH10	SLC25A23	MKRN1	PHLPP1			BIN3	HERC5
F5	PCDHAC1	NUDT6	PIK3R1	MSRB3	SAV1	SLC16A7	CYB5R3			ENO2	FLYWCH1
GPR155	ABCB6	LZTFL1	SEMA4C	STON1	ERMP1	OASL	PLCG2			ZSCAN25	MPC1
GOT1	BMP7	TCEA2	EPS8L2	FAIM	TMEM25	LBHD1	KMT2C			BABAM1	SPOCK3
DYRK3	CLDN4	ESPL1	CHPF	MARK1	ABHD11	ZNF280C	ZNF264			PHLDA2	KCTD14
ALPK1	TMEM80	DRAM1	ZNF280D	RNF25	FGD1	FOSL1	ZFP91			CSK	CEP44
DNAL1	PTPRE	ABHD3	SMG5	IMMP1L	JAK3	MAX	LRRC57			C4orf3	INTS6L
PPP1R26	ALS2CL	SLC29A1	NACC2	ZCCHC10	IRAK1	CLDND1	YIPF5			CFAP298	ITPKB
NUSAP1	CADM4	MXD3	STRADB	SETMAR	DSC3	ZFP36L1	SHROOM3			C19orf53	ELK1
VCAN	FPGT-TNNI3K	ALPK1	ARHGAP31	DYRK4	E2F7	DNAJC8	ZNF695			DOCK6	RNF138
ZNF232	RGS9	TLE1	NENF	FSCN1	LAMA5	MRPL57	CBL			TUSC2	APOBEC3B
SFN	ARHGEF17	TBC1D22B	GATA2	MAP6D1	CRABP2	COQ8A	DEPDC1			SHTN1	USP30
PRKD3	LFNG	SAMD11	GTPBP6	RASSF2	KIAA1522	ATP6V1C2	ALG11			RAB3D	NGFR
RAB3A	RBM41	TRIP12	MYO5B	NEK2	CYB5RL	PAXBP1	AP1G2			IER2	PC
CC2D2A	IRAK1BP1	CKMT1A	PCNX1	FLAD1	B4GALNT3	ZNF205	DNAJA4			ACADS	RUFY2
SLC38A2	ARRB1	MPZL1	MYD88	BMI1	NPM2	GNB1L	SDAD1			NAAA	FMNL3
RNF113A	CXCL16	FRA10AC1	PRDX6	STON1-GTF2A1L	TMEM185B	EHBP1	EHBP1L1			ACOX1	INPP4B
MPZL1	XXYLT1	HPRT1	BLCAP	CYB5D1	GSE1	SYTL3	TBC1D8			UBXN2B	C15orf40
PURB	FAM217B	EMILIN2	ZNF814	UBTD2	HOXB7	NIP7	PERP			ARHGEF35	UPF3B
SLC29A2	RASA4B	SLC25A4	CHD9	ARHGEF26	LPCAT4	BBS10	EEF1A2			STK17B	BRSK1
SGPP2	MELTF	HAUS8	AKAP17A	ZNF131	TMEM131	AP5B1	TM9SF4			GTPBP6	NBPF12
PHGDH	VAMP4	FERMT2	FHDC1	AKAP12	ABI2	CIP2A	FAM111A			PYCR3	KIF18A
MYO1E	NEU1	TMEM79	C17orf58	RGS5	FLNB	KNOP1	TRAPPC10			RNF125	ZFP41
HEXIM2	TMEM250	C5orf34	PLXNB1	CBX1	SH2D3A	RPL37A	LCOR			ATP6V1C2	FAM216A
KDM4D	IGF2	IBTK	ZNF100	SERINC5	MAP3K5	CEP83	BCKDK			RNPC3	HOXA13
RAB9A	ALG10	NUCKS1	KLF5	TMEM216	HELZ2	FOS	WIPF2			TMEM223	TRIM68
DISP2	BICD1	GOT1	TBCD	CDK5RAP1	DIP2C	WDR83	ASL			UBL4A	RND1
CCDC28B	NR2C2	HES4	KLF11	ZNF485	PALD1	GPR3	AGPAT5			APRT	ZNF239
CKMT1B	SAMD4A	C1QTNF6	DBN1	ZGRF1	LHFPL2	VGLL4	CLDN7			SEC22C	CST6
ITPR1	AHNAK2	PTPDC1	METTL7B	ZNF34	CST3	PIAS1	CAB39			N6AMT1	C1orf116
CRIP1	KCTD3	ZFAND4	CLDN4	SRBD1	FBXO6	R3HDM1	IQGAP1			NUDT3	ZNF527
SLC4A11	MB21D2	MPHOSPH9	SGSH	WRAP53	ZNF438	DNMT3B	VPS41			GLB1L3	ZNF76
NPRL2	HDAC4	LONP1	LFNG	KDM1A	RASSF1	SUMO1	RIOK3			ATP8A1	ARHGAP29
TXNDC12	SPACA9	SUN2	LITAF	CSE1L	LETMD1	RCC2	CLPTM1			SERAC1	SMIM3
ALCAM	UNKL	GNG7	PARVA	TROAP	NKX3-1	UBE2Q1	CDH3			EXOSC3	MAP3K5
AP4S1	BCAS3	GBE1	CTDSPL	KCNH3	IFITM3	MSH3	PRRC2B			AKAP12	HNRNPUL2
LPAR5	ZBTB14	SYDE1	RIPK4	SWT1	PPOX	GABPB2	AGO4			TMEM35B	STYK1
ARNTL2	CHRD	PRMT9	SELENOP	FDFT1	TTC19	BEX3	TTC9C			SH2B3	ANO1
RAMP1	USP46	YIPF6	OSBPL1A	EDC4	ZXDA	FOXD1	CHP1			SLC50A1	GPM6A
MPI	AAK1	MCUB	DMTN	TRPV4	SLC24A1	CSTF3	GNPDA2			MAPT	LMO2
FBF1	CD24	GRHL1	C5orf24	ZC3H15	BAIAP2	DNAJC22	AMFR			FASN	CELSR3
CA13	MYD88	DNAJB4	AHNAK	WDR89	GLB1L2	SENP8	LRP10			ITGA3	SAT1
CFAP44	ZFHX2	TRAF5	KIAA0930	NUDT4B	SPTBN2	RPGRIP1L	SUN2			TMEM161A	ZNF358
SLC39A10	LMBR1L	SOX18	NEU1	PCOLCE2	NAT9	HDDC2	FECH			ZCRB1	NIPAL3
SPC24	GABARAPL1	ACTR3B	AXIN2	AKAP9	JAZF1	C15orf39	TBC1D12			NCKIPSD	CEP164
SLC48A1	GLI2	WDR77	ADAMTS7	RTL8A	SYP	DUSP9	RRP7A			ELOF1	VSIR
EGLN3	ZNF488	ZBTB25	CYB5B	DPH7	CDH15	PPM1D	ELF3			AAMP	KIAA1549
POLE4	NFKBIA	MISP	ABRACL	SGTB	HHAT	UBE2E1	TMEM127			BEX2	KIF5A
CFD	RTN4RL1	CCNB2	C2orf72	ZNHIT2	CYB5B	CLEC2D	D2HGDH			TRMT2A	ZNF354A
MISP	PCBP4	SNX4	NECTIN3	SULT2B1	SEMA4G	C19orf53	ACAD8			TCTEX1D2	PAPSS2
EDA	MROH8	GMPR	STOX2	PXK	RNF207	PFN2	PMVK			SPAG7	MECOM
LONP1	KLF11	ANO1	ID3	ADK	RGP1	POLR2E	CELSR2			PICALM	HLX
SESN3	FAH	EDA	SLC25A53	ASAP3	NEU1	DPCD	KLHL2			PITX1	CEP85L
SAMD9	BMP1	SF3B6	ARF6	TAF5	TLE2	RPL36A	LARGE2			ACAD9	ARHGAP18
SLC25A4	PBX3	S100A10	STX3	ISCA1	ATF7	MPST	PARVA			PIM1	PALM
DDN	RBM26	RINL	MPC1	NXF1	STK11	KATNBL1	TMEM104			PHPT1	TGFB1I1
GJA3	KAT2B	SLX4	PCGF3	LPCAT3	MGST2	NUMBL	DCAF17			DHPS	TSPAN7
DPH3P1	PTK7	JUNB	HSPB1	IQCK	PPIL6	ANKRD54	ZNF320			BRF2	PLEKHA7
MGAT2	SPATA33	IMPDH2	FSD1L	DCBLD2	SMG5	PAPOLG	CCDC22			TMEM41A	ZNF385B
TMEM141	RC3H1	SLC26A2	SPTBN1	AMDHD1	DISP2	ECHDC1	STN1			PLEKHH3	TRMT10B
TAF1B	B3GNT7	ZFP36	EMP1	TXNRD2	RABGAP1L	STMN1	SCOC			GPN2	FAR2
BRSK1	FBXW4	CPNE8	RPS27L	HIRA	CD83	GART	DCAF10			SIRT1	SYT1
ZCWPW1	HERC6	PAIP2	RAI1	IP6K2	ZNF219	ZMAT2	LTBP3			VPS28	ADAMTS14
MXD3	SPNS2	INO80B	TGM2	TSPAN6	SLC38A10	NONO	ARL8B			MAX	SELENOP
RABAC1	FHIT	OGDH	TMC6	CNP	FECH	EMG1	KIF1C			DAP	SP110
NADK	CCNJ	GPD2	ZBTB34	NAP1L5	PRKCA	PRMT6	DGKG			PAIP2	DEPDC4
SATB2	ARHGAP31	RABAC1	GALNT12	ZNF581	UBTD1	ZC3H15	FUT1			MAP2K4	TRIM38
CYSTM1	GTPBP6	NFYB	PFKL	AP3S1	FUCA1	NUDT16L1	STBD1			CD276	SYNE2
METTL23	SLC38A10	IGF2R	IER3	RBM15B	SYNGAP1	NFXL1	RNASEL			MAFF	LSM14B
HSPA4L	SSH3	ARL6IP1	NCAPD2	NFIL3	FAM24B	ZNF200	SNAPC3			MYO18A	LRMDA
MITF	SPRY4	PHF3	MAP3K11	POLG2	MALL	RPS24	MED13L			ITGB5	ARHGAP42
DOC2A	ARHGEF3	SYNJ2	CFAP45	ATXN7L2	TRIM38	NGRN	CTDSPL			HMGCR	ZNF383
C12orf60	ERCC6L2	SWAP70	LAMTOR1	DMAP1	COQ8B	AJUBA	MET			RRAS	GRK5
ATXN1	TRIM38	TSPAN14	TM2D3	BCCIP	CMAS	RIDA	FOXP4			GSE1	EXPH5
QTRT1	FBXL2	SSB	TMEM87B	TRIAP1	FAM124A	ZNF485	CERS6			FAAP24	ZNF813
CST6	RHOB	MYLK4	HOXA9	PTPRK	CLHC1	TSSC4	ABHD3			MYDGF	UBLCP1
SAT1	RASA2	TFAP4	CCNJ	RCC2	TEN1	EXOSC4	BTBD10			EMG1	ETV1
HBEGF	COMMD10	HMGCR	ROR1	ZNF302	AP1G2	USP8	RAB40B			SDF2L1	SRGAP3
CDKN2D	OSBPL7	METTL8	HSPA2	ACSM3	MSL3	DDHD1	PRSS8			JUND	FAM111B
SUMO3	ITPKA	LSM3	OVOL1	PRKRA	NUMB	MIS18A	PHLDA2			AMDHD2	FSBP
ORMDL2	THSD4	SLC39A3	IFITM3	IRS1	CYP2U1	CXXC1	FBXO25			PIGH	KALRN
SLC27A2	DAB2IP	ILVBL	ZFP30	SLTM	PBX4	CTCF	CDH1			FAM53B	CAMK4
SLC49A3	GMDS	TESC	ZNF268	MYBL2	ADGRA2	NANP	UBL3			ACADVL	AXIN2
EMC7	ARHGEF9	LCA5	MAN2A2	PRRT4	EHBP1L1	KDM5B	SIRPA			UFC1	NR5A2
MYBL1	TREX1	CPVL	RAPGEF2	ATG4C	C2orf27A	MRPS11	CLN3			SLC39A3	SAMD11
TUBB2B	USP35	GMNN	ENO2	PANK1	CCDC142	BRMS1L	CD99			NUDT4B	PRRG4
LGMN	KCNS3	HERC3	NR1D1	GEMIN7	ZNF385B	RAB33B	DNAJC13			ID1	MOSMO
PRPS1	UXS1	NPRL2	NUAK1	EIF1B	PAPLN	TRAF5	NRIP1			ALKBH5	SAYSD1
LBR	SUPT3H	PRPS1	MPRIP	DENND2C	GRID1	RPL36A-HNRNPH2	GNAS			C8orf33	CAPN6
ZNF572	UTRN	GPR160	ARVCF	VMA21	IPP	AFMID	ITSN2			DFFB	ABCG2
EFCAB2	CISH	VMP1	ARRB1	SH3RF1	IFI27L1	TRAFD1	URGCP			NOC2L	NECTIN3
SLC27A5	LPP	METTL2A	ARID5A	VPS45	CRADD	CCDC58	WASF2			SERINC5	RBMS2
SKIL	GPD1	KCNG1	BORCS7	AKAP8L	TMCO3	PELP1	UNKL			ATP6V0B	ID4
HSD17B10	ZNF268	NEIL3	KIAA1522	TTC27	TRAPPC12	HMGB3	PAQR5			TUFT1	TGM2
STARD8	ITGB5	SSU72	SDHD	GFM1	GATAD1	MFGE8	PLEKHG4			DEXI	JAG1
TLE1	TEX9	NIPAL3	ZNF888	ZNF48	TMEM250	ZNF92	E2F1			EEF1D	CASP4
ARL6IP1	OXA1L	TIPARP	YAP1	GTF3C5	MKNK2	GPR63	TMEM181			SLC22A5	EPS8
NOXO1	TP73	CKMT1B	TP53RK	C14orf93	CHST14	PCBD1	TRIM44			GCFC2	DDIT4L
IFT46	LGALS3	MRPL2	MAGEA12	ACADVL	CELSR1	PASK	SLC35G2			KDM5B	F3
BBS10	ATP1B1	ECT2	ARSG	CPOX	DPYSL2	BRIP1	PRAF2			TEPSIN	AIP
TMEM120B	NATD1	ZNF367	MID2	ZNF143	FAM168A	C2CD3	MAN2B2			POLR3G	TNFRSF11A
PAIP2	NUAK1	BRWD3	ZNF816-ZNF321P	TLCD1	RAI1	CCDC34	CIC			PRPF18	ALG1L
LPCAT3	IRF9	SH3RF1	ST6GAL1	BCL7A	ZNF746	MARK3	KRT19			CLEC2D	ZNF350
NR3C1	ADGRB1	HEXIM1	CACNA1B	CCNJ	CBFA2T3	PGRMC1	SMG5			OTUB1	RGS2
HMGN3	LYPLAL1	MIDN	IKBKG	EBF2	TMEM151A	BDH1	KIAA1671			SRRM2	TSC22D3
TEDC1	HOXB7	ACSL3	SPATA6	KCNG1	GNPTAB	NVL	CUL7			WWC2	H6PD
THEM4	RIPK4	PDCD5	RAB6B	SOX12	SELENON	GID8	FKTN			FAHD1	SNX15
TXNDC16	RGL3	DMKN	MSI1	TSEN2	CDC42BPG	RBBP5	BMP7			AP4E1	SYTL2
PEX6	COASY	HJURP	HDAC7	KALRN	TSTD3	OSGEPL1	TMEM14A			BOP1	SLC1A1
CYB561D2	PLEC	TSG101	ARHGEF40	CTPS1	JUN	ZNF777	FAM114A1			GTF2H5	IGSF9B
RAP1GAP2	FBXO6	SFN	LIN7A	HNRNPH2	DOCK3	ZMYM3	DSC3			ANKRA2	SLC22A18AS
SULT2B1	PTPRK	PIF1	PDIK1L	GALNT14	ZBTB47	ZNF267	GRK2			PTPN18	ZDHHC2
PTGES3L	TARBP2	GTF3A	ITSN1	SMARCC2	CD59	AKAP12	ATP13A2			ABHD2	PACSIN1
SYTL3	C11orf95	RLF	NCKAP5L	MYC	NOXO1	IER5L	SLC39A11			POGK	SUSD2
FAM162A	ORAI2	SGTB	CMTM8	CWC27	PARP16	UTP14C	SP6			MAZ	NR2F1
ETNK2	ANGPT2	PAQR4	SH3BP4	FOSL1	GATD1	SPSB1	SSH3			HSD17B7	TNIK
PTTG1	ZNF107	CYP51A1	ARHGEF10L	ATF5	PXMP4	POLB	TXNL4B			ZPR1	KLHL32
TRIM24	ANKLE2	RPL9	PALM	ELAC1	CDH1	TFPT	LAMB2			DCP2	SORBS1
OGDH	PDE4B	RB1	PRMT6	BRMS1L	EHD1	NDUFS5	C8orf44-SGK3			LTBR	ZNF773
ARL2	TMEM87B	OIP5	FHIT	C1orf112	BEGAIN	NDUFS3	SRPX			PGLS	ZNF254
ASPH	DNPH1	PGGHG	C19orf12	R3HDM1	LTBP3	THAP7	PLEKHA1			SF3B5	SLC4A8
SGMS1	CA11	TMED1	BAHCC1	STK36	PLXND1	ZNF131	PLEKHA7			CHSY1	ENPP5
LAMC3	ANKH	ZBTB2	LRRC57	MRPL57	NPC2	ZC3H18	AMOTL2			HEXB	DCUN1D3
INO80B	ARL4C	SYVN1	PSME1	CUTC	AZIN1	NDUFAF5	ARMCX5-GPRASP2			SOCS3	DGAT2
GBA	MISP3	ARNTL2	B4GALNT1	POLR1C	MAP3K6	ANKZF1	TGFB1			TBC1D17	STARD9
FAS	RBPMS	PDE8A	VPS13C	SLC30A3	PLEKHH3	RPL17	IFI35			VPS35L	SLC16A6
WDR19	ZNF254	LBR	ZNF383	ECH1	AK4	PRMT3	CMIP			SETD4	KRT20
PIGL	MAN2A2	ITGB1	UHRF1BP1	FAM136A	PIK3CD	BANF1	KCTD14			POMT2	IRX5
PLEKHN1	SNX30	AHCYL1	DHRS1	NUCKS1	TMEM65	WDR59	ABI2			TBL3	SESN3
LGALS1	ARAP3	GPSM2	CRLF1	GALK2	SEC14L4	MRPL28	IGF2R			NOL6	GOLT1A
SEMA3G	ADGRF1	RAD51	HOXB7	OSGEPL1	GCC1	ZC3H12A	NAPEPLD			RPS24	GPC3
OSBPL6	ESPN	CRIP1	ACOT7	PELP1	PLEKHG4	RPUSD2	SGK3			MRPL38	RUNX2
RNF26	NCK2	SPSB2	ZNF621	KDM6B	SMARCD3	NFIA	NPAS2			SRSF2	MCF2L2
ELMOD1	HDAC7	XPR1	TNRC6C	JUNB	N4BP3	POLR3G	ST14			CCDC51	NEURL1B
TXNRD1	CTDSPL	NDC1	BOD1	CTH	IGF2R	HNRNPH2	NRBF2			CTU1	LYSMD4
SUGCT	HNRNPCL1	METTL23	SYNE3	MID1	LRFN3	SELENOH	ADORA2B			SLC25A13	RAPGEFL1
SYDE1	IQGAP1	NFIA	FAM83F	POLR3C	TRIM44	PLCG1	TRAPPC2			DAD1	AMIGO3
PAOX	SLX4IP	PRKCH	CLDN3	DNAAF2	NR1D1	SNRPF	TXNRD3			AGPAT2	ACVR1C
HK2	MSX2	SURF2	ETAA1	NSUN6	SUN2	FOXP1	SPG11			TRMT112	KIAA0040
FERMT1	NUDT13	UBXN11	SUPT3H	WDR59	PLXNA3	ARL6IP1	NUCB1			RBM42	ARSG
IL17RC	ZNF385B	AK1	MAP3K3	TPBG	CLCN4	MOCS3	SORL1			ATP5MPL	GSTM1
ZNF134	ABR	HYLS1	PMF1	SYMPK	PHLPP1	PSTPIP2	ADAM10			TRMT61A	EHF
SLC16A13	ANKMY2	MAP1A	DDX58	KIF18B	CIB2	MRPL34	LNPK			FGD6	SLC9A2
TNFRSF11A	MED23	ERRFI1	ZNRF1	GNB1L	ARF5	ATP9B	TMEM9B			EPHA1	DYNC2H1
TMEM14A	SIK2	FAM162A	CITED4	ANAPC7	DDX60	DYNLT1	SYNGR2			DCPS	WNT2B
KNSTRN	DNAJC13	APBA3	VASN	NOL10	GOLT1A	PLXNA1	FGD4			CDK5	PDLIM5
TMCC3	LYPD6B	GSTCD	RASA2	NMNAT3	TVP23C	TANK	ITM2C			SDC3	CPEB2
HJURP	ZSCAN30	HACD2	LPP	MRFAP1L1	KMT5C	RNF25	WDR35			ZFYVE19	PLA2G7
ZNF391	MBP	LIN37	TTYH3	TUBA1A	DPP7	FBXL14	LGALS3BP			ODF2L	BAMBI
PYCR3	ZNF358	ZCCHC4	ZNF385B	ZCCHC9	SSH1	SIRT4	PBLD			THAP6	VASH2
RFC5	RIN3	PGM3	SPNS2	INTS9	MED6	ID1	ERCC6L2			NFKBIB	HOXB6
CD44	RXRA	CD44	NUP62CL	PLAT	OCEL1	BTG2	UGT8			HNRNPH2	GOLGA8A
PIP4K2A	NR2F1	ANKZF1	ZDHHC23	KNSTRN	CLDN15	SIN3A	GBX2			BCL2L2-PABPN1	ADGRF1
XK	HOXA9	FBXO38	PPL	TOX4	MAGED2	GNL1	ANO6			TMEM167A	BDNF
HYOU1	NAB2	LARP1B	STARD10	COMMD3-BMI1	FAM3A	MED27	HEATR5B			ARHGAP26	F10
NUDT7	ANKRD26	SWT1	MORC4	PDXP	CXorf38	MXD3	SH2D3A			KLF6	HOXB4
BMP8B	ADAM21	KNSTRN	ULK1	RRP1B	DUSP23	SRGAP2B	TPCN1			LIG4	CYP24A1
SAMD13	ARHGEF10L	PLOD3	CBWD6	SLC25A33	GJB3	EMC4	SYNE2			HSCB	HOXB8
C21orf58	SLFN5	FOXRED2	FAM117B	NFYA	RSPH3	CHD7	SOCS6			DPP3
LAMA3	TBCD	TMEM245	DECR1	RRM1	LRRC23	IGF2BP3	TSPO			TUBB6
ERC1	KIAA0825	CHMP7	MCM9	C1QTNF6	PPP1R37	KATNB1	DNAJB9			TTLL7
SLC44A2	NTN1	SFR1	SMARCE1	FRA10AC1	RTN4R	C2orf69	LEPROT			RPL21
AHCYL1	OSBPL5	MRPL17	ZNF493	UTP3	BMP8A	CTDSPL2	CCNDBP1			PFKP
CPE	BRPF3	AURKA	KLHL25	ZNF684	DTX4	C2orf49	CORO2A			IMPDH1
YIF1A	CYFIP2	GPR155	RDH14	NKIRAS1	HLA-F	TRIM59	PACS2			STAM
SEPHS2	PPM1L	HYPK	ARMCX5-GPRASP2	ISL2	ZNRF3	EIF3J	ICMT			NFKBIL1
THAP11	PTPRJ	SLC27A2	PTPRK	THOC1	ZNF473	ACADVL	SLC12A2			MGMT
ELL2	CTSH	COQ10B	KMT2D	COPS7B	DGKG	CHD3	MTMR8			WNT16
NRGN	ATP13A2	KDSR	MDM2	ALDH18A1	SPACA9	YY1AP1	ICAM3			POLR2H
AURKB	ETV1	MLF1	KDM6B	LAMB1	A4GALT	SOX4	BSDC1			DNPH1
DALRD3	SLC30A1	PSMG3	UBOX5	SPNS1	GLCCI1	DCBLD2	APP			ENTPD2
TSACC	BTBD3	TSPAN12	GULP1	DEPDC1B	FAM214B	ENAH	EPHB2			EEF2
ZNF789	DUSP4	TNRC6A	PIM2	CYSTM1	ARHGEF2	YAF2	HIPK3			FADS3
ABCA7	SLC37A1	FAM161A	BCAR1	TRIM59	NAPB	NOL8	SLC25A16			ZNF799
BCKDK	ZFP14	ADIPOR1	PRKACB	KLHL17	TNS1	MATR3	R3HCC1L			DGKZ
CHEK2	RNF217	ZNF747	LZTS2	C14orf132	TESMIN	ZNF7	HSPB1			SLC9B2
TESC	KLHL30	GJA3	TLNRD1	MAP3K20	TBC1D5	POMT2	CD82			PYGB
MXD1	NKD1	HYOU1	ZMAT3	TAF6	MXD4	FNTB	STK25			EFTUD2
RAB31	SPECC1	STMN1	CBWD3	DPF2	THBS3	CPSF4	ULK3			SHISA5
C6orf89	ZNF124	ERC1	IRGQ	HAT1	PRRG4	HNRNPD	ACTR10			TONSL
LTBR	ZFC3H1	HSD17B10	PALD1	SMC2	B4GALT7	RPL17-C18orf32	TMCO3			LMTK3
GEMIN2	TMEM198	EFCAB2	NR2F1	EXOSC6	NDUFAF3	LPCAT3	ELOVL7			ZC3H6
CHAC2	PLPP3	AGAP2	FAHD2A	ANP32A	HTR1D	INTS13	SELENON			RRP36
PDK1	FBXO2	ZNF721	MAGEA6	UBA3	KRT80	ARRB1	ST6GALNAC4			SLC35C1
NBPF1	TMSB15A	TMEM97	OLFM2	CPT2	ZBTB42	CCDC117	EHD1			TRIM56
POLR3G	SIGIRR	EMC7	AASS	NRDC	FURIN	KDM1A	PIGV			TRAPPC2L
ARNT	ATP6V1E2	GOLGA8A	INVS	PBXIP1	GALT	BUD23	ZNFX1			NIN
PIGA	SMAD1	GREB1	CBFA2T3	ARMCX5	RXRA	NAA38	SUPT3H			NDUFB8
ATG4C	TMEM117	RNF125	SCRN3	TPST2	TMEM59L	SERTAD1	MCTS1			NAV1
SPRYD4	TESK1	EIF5A2	SNX30	RAB11FIP4	ANKRD28	MRPL33	SH3GL1			TOMM7
TRNP1	PRDM5	PTBP3	DUSP28	PTDSS1	ZDHHC23	TAF9	PALD1			PDIA4
ARMC1	TUBA4A	EIF4A3	MPP1	ECHDC1	CNPPD1	CCDC50	SLC30A5			KCTD10
MRPS10	EMP1	THAP4	DELE1	TRIM16	CAPN1	TMSB10	TMOD2			ASPH
PNP	KRT80	COLGALT1	RAB43	SCMH1	HOXB9	MAP4K4	MARVELD2			BRD2
NXPH4	MSI1	RAD52	APPL2	TMEM251	SLC35F6	MRPL41	CHMP4B			MRPS26
TIMM8A	PPM1F	MED29	KLHL42	CPS1	ITGA3	CXorf56	LDLR			SLC27A2
PSRC1	PLPP5	ALG9	GCA	TNFRSF10D	ZNF747	EIF2B1	LGALS3
APBA3	SMO	DNAJB11	IQGAP1	SSB	SMTN	CPSF6	PYROXD1
STARD13	ULK1	TBL3	BMP1	TAF11	SLC16A13	KRI1	ZMIZ1
TMCC1	CD82	RRAS	PLEKHA3	TMEM125	IFITM2	P4HA1	ITPR3
PTPDC1	ZNRF3	WRAP53	PER2	MRPL50	LOXL1	DMAC2	SMYD5
MBOAT2	RFXAP	NEMP2	ABI2	SH3PXD2B	DGAT2	RAB9A	RC3H2
RHNO1	DSP	SKIL	BAK1	GRHL2	POFUT2	KIF22	TNFAIP2
PRSS16	DPYSL4	PELI2	TSPAN13	RRP9	KCTD3	FZD3	C3orf62
SNAI3	KCNN4	GABRD	PPP1R37	ZBED3	CLIP2	BMT2	SLC15A4
UBE2L6	NKAPD1	OGFOD2	KLHDC4	CBX5	PCYOX1L	MTFMT	SERPINB6
BCL2L11	CGN	RPL23	PTK7	CNTD2	TMEM63A	NUDT4B	RAB6B
LIX1L	STK11	RNF13	STEAP2	STAT6	TRIM41	HCCS	FER
PLOD3	ZNF658	RFC5	ZNF84	TRPM6	TMEM141	TACO1	IRAK1
CNPY4	ZNF33B	SLC44A1	KLK8	PRKAG1	GALNS	CHTF8	RAPGEF2
VRK1	TSPAN1	CDIPT	PCTP	TMEM183B	SLC9A8	SETD2	AZIN1
CDCA2	BCAR1	ATR	LYPLA2	CDCA7	PON3	TBCD	TRPM7
RB1	ZFP30	TRIB1	CTDSP2	ENTPD7	PLCD3	TIGD1	PC
TRIB1	ABI2	SGK3	TMOD1	MAGEF1	CMTM6	RPL22L1	WDTC1
WASF1	UNC13D	EDARADD	CABLES1	MGST1	MTHFR	CHURC1-FNTB	TINF2
FOS	ZNF320	KDM3A	BIN3	SMARCA1	APP	NANS	CYB561
MMAA	PCTP	TUBB2A	RTN4RL1	CD3EAP	MCC	UPRT	GM2A
SPDL1	EFR3B	GSR	ERCC6L2	TACO1	KHDRBS3	SLC27A2	PRKACA
DEPDC7	CRY2	NECTIN1	SUSD6	HCCS	MLXIPL	NEURL4	DDX60L
RASD2	ZNF618	RPL22	TP53BP1	TRIM36	BRI3	COA5	AKR7A2
PLEKHH2	ZNF219	SEPSECS	BTBD3	NAGS	DNER	KIF15	SMTN
PCED1A	PCSK6	ABHD14A	CDIP1	TRMT10A	SLC2A3	LUC7L2	RAB11FIP1
SGTB	PCDHAC2	LYRM2	NLGN2	RPUSD2	LSS	DAPK3	TMEM219
CDC42EP2	STOX2	WDR91	COQ8B	DDX46	CD44	SLC16A10	ARMC3
TRIP12	VAMP2	CCP110	ZNF430	GPRC5C	STX7	PDLIM1	CCND1
EIF1AD	DTNA	KIF20B	CBWD5	PIM1	FAM72B	RNF2	ECM1
SSU72	ZNF713	DERL2	CRADD	CHMP1B	RAB40B	EIF4H	TAOK1
WDR77	LTBP3	MOGS	ZNF124	POLB	TOB1	CYSTM1	F11R
ERCC1	YAP1	ATF6	NCK2	KAT8	NES	GRHL2	TRIQK
PLA2G10	HSPB8	VCAN	CALCOCO1	AURKB	SLC1A4	TRIM13	PXMP4
CEP350	FAM210B	LMAN2L	MGMT	PHC2	ITGA7	FBRSL1	BIK
SLC6A8	PARVB	NR1H2	TARBP2	COA4	EPG5	LRRC45	GSTT2B
TTLL3	SCD5	MYO1E	MVB12B	LTBP1	SHISA4	IDI1	GSTT2
IFNGR1	MAGED2	FAM210A	BICD1	TMEM177	FBXL19	RRP36	FAM47E-STBD1
ZNF747	ZNF596	STK17B	LPIN2	C9orf116	ANTXR1	TRIM28	HS6ST2
CDH15	MEX3D	SCD	GLRX	UBE2E1	STOML1	EMC10	CAPNS1
CCDC68	IPP	NOC2L	DEXI	TMEM131L	RNPEPL1	PTP4A2	ABCA2
RTN2	KCTD18	MTO1	LY6E	NKX1-2	PARVA	NOP2	AKR7L
ACSL1	NUDT16	HEXIM2	FKRP	DUSP9	SLC12A4	ZFYVE26	SLC1A4
ABCA3	IMMP2L	CLU	SKI	TOP2A	HDAC4	RPL28	SPRY4
DEPDC1B	CLIP2	LRRC8C	BMPR2	ST7	SMYD4	BRCC3	MGAT4A
NEIL3	HECW1	ASPHD1	KCNN4	CACUL1	APIP	MRPL53	CMAS
NDUFC2-KCTD14	LIMA1	SLC39A10	PRSS22	ATAD3A	CD9	EDC3	ECE1
FAM210A	FAM219A	RPUSD2	KCTD18	ST6GAL1	BSDC1	TMPO	MVP
RFX2	FAM169A	ADAM9	DLG3	DZANK1	PTPN21	RILPL1	PCYOX1L
CCNF	TNFRSF18	NR2C1	EPG5	GPS2	CCNJL	UTP6	ACY1
ZWILCH	ITPR3	ASNS	PLEKHM1	SLC25A12	MROH1	LSM5	FAM83B
RAD51	ZBTB38	SSR3	PLEKHB1	NCOA5	NLRX1	BEX2	P2RX5
METTL21A	UHRF1BP1	CKAP2	TMA7	LPIN2	AIG1	PARM1	SPR
SLC25A11	AMOT	PITPNC1	EPAS1	SOCS2	RRAGD	POLR3E	MEF2D
KDSR	GPR157	ALDH3B1	CCNG2	SYDE2	EDA	RPS18	ATG4A
MESP1	BZW2	EBP	AGO4	PITX2	IBA57	UBTD1	TNS3
TOR1B	LRRC57	CWF19L2	ATP8A1	PIMREG	BTBD3	TRAPPC4	SIL1
TRPT1	DHRS1	TMEM199	GATD1	RPF2	VAT1	UTP14A	SPHK2
GPR89B	AGO4	SLC7A5	STAG3	ANKRD13B	SPATA20	LRCH4	TMBIM4
ZDHHC6	KLF2	PPP6R1	AACS	IFT88	TRPM4	EID1	RNF135
GBE1	SMIM20	ANP32E	GRAMD2A	KLHL22	IDS	KBTBD6	OAS3
CDRT1	TFEB	SMS	AGPAT3	DCAF4	WWC3	SAFB	RGP1
MRPS7	TEN1	RNF26	RABEP2	STRIP2	LHPP	UBL4A	CCNB2
WDR47	NACC2	TXNRD1	OBSCN	MAP4K4	HUS1	TCF7L2	PTK2B
SKA3	HSPA2	NASP	SPRY2	LCMT2	TMEM104	RMDN3	ATP1A1
TMEM249	LRRC56	PSMA7	EPS8L1	BEX3	TMEM51	NR2F1	FRMD6
DENND3	PLCB1	LBHD1	PSKH1	UPF3B	PRPF40B	KNSTRN	ADGRE5
NR6A1	ALKBH7	GDA	MTMR11	ZNF821	MSLN	SGO2	PLD2
CD40	GSTM4	C8orf44-SGK3	ESPN	MTERF4	MSRB2	RPS6KC1	BCL9L
ECT2	PALM	NRGN	ZNF264	ZNF3	PPIP5K1	NCAPH	DPYSL5
KIF20A	SNX1	TOMM40L	PMF1-BGLAP	ESCO2	TECPR1	TFDP2	CRELD1
AGTPBP1	CACHD1	ITGA6	CFAP69	ZNF416	SGSH	TPI1	AK9
MPDU1	CHPF	RPS28	ARAP3	OVOL1	SLC35D2	RANBP10	NT5DC2
TES	IRAK4	GBA	E2F5	TRAF4	PRSS8	MRPL47	DYNC2H1
TMEM63C	PHF6	LPAR5	SULT1A4	HMGB3	ADORA1	PTPRS	NPC2
ZNF169	PGPEP1	DEPDC1B	SULT1A3	CENPA	ZNF888	PA2G4	DENND1A
COQ8A	AKR7A2	IL22RA1	SDR39U1	ATF3	STN1	PSD4	SLC12A6
CD3EAP	ADM2	VKORC1	RAC3	SLCO3A1	RBM26	SEPHS1	HIPK2
CDC14C	PCDHGA3	QTRT1	PRRT1	TBCD	ARPIN	TTF1	SARM1
SLC16A14	IL17RE	C12orf29	VEZF1	PUS7	SCNN1A	LYRM2	SFT2D1
ILVBL	PCDHGC5	ALDH2	NAA30	MRPS9	PCTP	PRPF18	SCARA3
TMEM35B	PER2	TFB1M	THRA	NADK	SMURF2	DKC1	TMEM214
TAF12	SPIN2B	C6orf120	LYPD6B	MTIF2	RABGGTA	TSPAN14	HERPUD2
TMEM97	ARHGEF5	KLHL17	CCDC71	ZNF830	DPYSL5	HIRA	COX17
SRD5A3	NINL	POLR2I	FDXR	PHF23	MACF1	PCBP1	USP22
WNT10B	PCDHGA2	PCK2	DAB2IP	ADAMTS7	MCFD2	CRTC1	CRYBG1
WDR25	ATP8A1	NCAPG	SLC22A5	OIP5	TRPT1	TLCD1	TAF10
CEP68	NTSR1	RDX	DNAAF4	LEO1	SNED1	CFAP298	SAV1
MOB3A	NCOR2	SAT1	KIAA0319L	SLC25A28	TGFA	RPL24	DENND2D
ITPRIP	FAM149A	SLC27A5	ZNF443	DNAJC18	ARMC5	ZNF770	CRISPLD2
MRPL33	PCDHGC3	BTG3	RAB11FIP3	GNPDA1	USE1	DHX57	RBCK1
COQ10B	CTIF	MPDU1	SNX1	TMEM97	KIF13B	SRRT	KALRN
RIN1	PCDHGB5	QPCTL	ARHGEF3	CACNA1B	CUL7	RAVER1	CLDN4
CENPA	PCDHGC4	TECR	TTC19	FAM220A	PLEKHG5	PCM1	NTSR1
SNX4	PCDHGB4	LAMB1	DUSP4	MLKL	BCL9L	WDR90	PLAUR
HAUS8	GRID1	SEMA4B	CLCF1	MCM7	HSD11B1L	COTL1	RAB11FIP2
ARRDC3	PRKAG2	TMCO1	MYO1D	WASF1	TMEM184A	LEO1	ACAD10
TMEM38A	SPEF2	RFX2	ZNF92	PGD	ADCK2	CITED1	ADGRA2
FOSB	ZSCAN2	CCNF	MROH8	MISP	CHDH	IRS1	JAK2
ZMAT2	PCDHGA11	CENPE	ACOT8	POC5	TOX2	NTAN1	PDE4B
CDKL1	LRRK1	DMAC2	LIMA1	ZFP36L1	KIAA1671	RPL21	TNFRSF18
TMEM69	ATP11A	RBX1	ARID3A	DYNLT1	S100A14	PRMT9	MTX3
METTL6	PCDHGA7	PLD6	DOCK3	MFSD13A	CTSZ	ACBD6	ANXA6
PLEK2	TP53BP1	RPS27A	SPACA9	NLE1	APOL2	RPEL1	DPYSL2
CCNYL1	SLC36A1	CYB5A	APBB3	DDX1	MINDY2	NXT2	TRPT1
OXSR1	PTGES	BCKDK	CD83	ADGRG6	PRELID3A	LMNB2	EXOC5
ACADM	PCDHGB6	ARL2	REEP2	MINDY4	CIC	TTC26	SIPA1L1
ACOXL	EGFR	CA13	KCTD15	LRRC8D	CLDN4	SMIM26	NFAT5
PCK2	PCDHGA5	RPS8	JUP	RPP38	MTUS1	PRDM4	SPRED1
DONSON	PIP5K1C	TAF1B	PPP1R9A	TMEM265	KIAA1614	MND1	ANXA9
TIPIN	PCDHGB3	ZNF789	MAGEA3	B3GNTL1	ZNFX1	PPP1R14B	PRDM16
FAM83D	ITPKC	DNAJC22	ATP1B1	ZNF283	KIAA1324	TOMM22	GPATCH11
FGFR4	CPNE2	ZHX1-C8orf76	RHOBTB3	RPP30	LRRC3	MCM7	DCAKD
LAGE3	RNF170	MYADM	PRKAB2	DONSON	LLGL2	KCTD11	MIGA1
GDPD1	RBM4B	GPS2	FRMD5	RRS1	SYDE1	TUBB2B	EPG5
DBNDD2	PCDHGB1	TM7SF3	FBXO4	NUP35	FAAH	TIA1	RAB3B
CCDC163	RRBP1	C6orf89	CSRP1	PRMT3	CPQ	POLR1C	PATL1
PIH1D1	JUP	TMEM35B	GLIPR1	SCAMP1	NAGLU	ANKRD40	KLF3
NEK3	SETD1B	RABGEF1	ZNF688	FBXW9	EBAG9	HNRNPA0	RRBP1
IRX5	DIP2C	YBX1	FAM160B1	PDE7A	ARHGEF9	RRP1B	ANTXR1
IQCJ-SCHIP1	HOXB13	C11orf98	COMTD1	BCOR	BCL2L2	GOT1	RABGGTA
SCHIP1	ERAP1	CENPL	ZNF197	ASPHD2	FAM131C	CWF19L1	TMEM184A
GALNT6	PEX12	DOCK6	HSD17B1	NECAP2	TRPV3	NOC2L	DENND5B
NMRAL1	LRRC41	PKMYT1	CMTM6	LARP1B	KIAA1841	GFM1	FAM168A
DNMT3B	RALGAPA2	STAG2	ZNF543	OPA3	B9D1	VDAC3	CHD1
OIP5	CYB5R2	ITGB1BP1	ZNF761	ACD	TRAPPC2	RBM4	MAP3K15
FAM229B	PCDHGA6	SMUG1	NAB2	GPT2	TUBA4A	ZFAND6	LRP8
KLF10	MYO1B	SLC46A1	PLA2G7	HK2	STOX1	BOLA2-SMG1P6	S100A14
EIF2S3	PCDHGA12	STIL	WDR66	SLC6A8	ATL3	U2AF1	HERC5
ACSL3	RAPGEF1	RNF2	LSM11	MRPS31	ZC3H6	MOSPD1	TM2D3
HIVEP2	KMT2D	LDHA	CNEP1R1	SNAPC5	SLC2A8	TBPL1	UXS1
HYPK	SUSD6	STIM2	PIK3C2B	UTP18	HDAC11	TNFRSF10D	TGFBR3
IER2	MEX3A	PDGFRL	HYAL2	CPSF4	BCLAF3	CTNS	RNF213
ACD	ZNF92	RGS20	MPHOSPH6	GFOD1	FGFR3	MIA2	MYORG
TMEM223	SSBP2	TPST1	SSH1	PSMG1	BCORL1	PTTG1	OMA1
PHF3	AP1S2	FSCN1	PTPRE	NCAPH	STK26	DNAAF3	NIPAL1
RAB3IL1	ADAP1	NOCT	IFITM2	TES	JADE2	EED	NAP1L5
TMEM255B	PCDHGA9	BCL9L	SPATA17	SS18L2	CMTM8	RAP1GDS1	CCPG1
RAB27B	ENGASE	PNPLA2	TSPAN17	ZNF620	CCDC24	NUFIP1	EFHD2
PAAF1	TSPAN13	UACA	DMRT1	TMTC4	CST6	DNMT1	SLC2A8
SLC52A3	ZBED4	MED20	ZFP62	DAPK3	PLEC	ZNF316	UBOX5
SAMD14	KDM5B	TXNDC12	ZNF226	TERF1	ADAMTSL5	ALDH1B1	CNPPD1
DNAJA4	CYP2U1	TWSG1	CGGBP1	C12orf45	CAMK4	LNX2	MYOF
ELOVL1	C19orf25	PAFAH1B2	ADAT2	DUS2	SERPINB6	TSPAN6	CCDC120
DRAP1	LIMD1	CDCA2	CAMKMT	ZNHIT3	SRD5A1	RBM22	AHNAK2
ITGB1	HCN4	OXSM	FMC1	EXOSC2	NR2C2	ZNF436	EPHA2
THEM6	TTLL7	C18orf54	HDAC11	PRR5-ARHGAP8	ARHGEF10L	RPS2	RAB23
SPC25	ZNF724	FANCM	SDC3	NUP107	COBL	ANP32E	ZNF383
CTSL	DEAF1	PAXBP1	ZFP36L1	CHD7	ZMIZ1	METTL2B	COL6A2
PLCD1	ZNF710	ZDHHC12	TMEM198	ZBTB1	IL17RB	RPL5	TMEM102
UTP6	SYNE3	TMEM64	TMEM117	HDDC2	CRELD1	RANBP2	APBB2
GTF3A	KLHL25	POLR3G	GPR161	BTN3A2	EPS8	ZNF518B	ARNTL
RRP9	NHSL1	ZBTB48	ZNF765-ZNF761	FAM133B	DCAKD	SERBP1	USH1C
NOC2L	PCDHGA1	MDP1	ANKMY2	SPSB3	FHOD3	COA7	TRAPPC12
PRPF40B	MYO1D	MRPL41	MPPE1	STMN1	SESN3	CERS5	TMEM40
DNAJB11	PCDHGB7	VPS51	PON2	PGRMC1	KIRREL1	RPL9	DDX58
MTERF2	MFAP2	BCL6	ASIC1	TUBD1	PPARD	U2AF1L5	DHRS4L1
CHML	FAM160B1	RTN4RL2	ETHE1	TCF3	FNDC3B	METTL1	GPR180
EBP	GATD1	SLC16A14	ZMYND11	ZFYVE26	ANXA6	ZNF574	ABTB2
REEP4	DOCK7	RAB29	ZNF660-ZNF197	TANGO6	SH3TC1	VPS51	KIAA1109
NCAPG	TUBA8	B4GALT4	ZFP41	LRRC6	EPN1	RPS28	TUBA4A
TMEM241	ZNF431	CNIH4	CAMK1	ST7L	DDX59	PTPA	ATP5ME
TPST1	PCDHGA4	FGFR4	EPB41	ANKZF1	DNAJC28	ATP6V1F	R3HDM4
ATP2B4	ZDHHC24	ZDHHC6	MFHAS1	ADSL	TMEM191B	ZSCAN21	ZNF490
APBB1	ZFAND3	ABCA7	WBP1	MRPL47	TNRC18	PMF1	AQP3
ZBTB2	SMG5	CST6	HTR7	NAP1L1	ZNF699	AGTRAP	ZNF76
HEXIM1	ID3	RAP2C	PECR	DOC2A	ATP13A2	PLAGL2	TPGS2
DBNL	FIBCD1	SLBP	ZNF714	NMB	CES3	GPAT4	NT5C
SLC12A6	PCDHGA10	KCNMB4	NDST1	CCDC191	JUP	POLR3C	ANKS6
ALKBH8	SCAPER	ENC1	PRR15	FANCI	LMTK3	CCAR1	PFKFB2
ALDH3B1	ARFGAP3	CENPM	ZBTB38	FOXO4	NPTXR	TUBA1B	SSC4D
KCNJ12	ZXDA	RPL30	CXXC5	HDAC3	C11orf80	ATG4C	ANKRD28
KCNJ11	NCKAP5L	PELP1	PTGES	FAM200B	UNC13A	RPL38	GPM6A
KBTBD8	DBP	PTDSS1	HDAC4	GPATCH4	PIGV	RNF113A	E2F7
TMEM107	RERE	FAM83D	MAGED2	OSMR	RHBDL3	FOXM1	RYR1
LMLN	ABRACL	RACGAP1	HADH	POLR3E	MAL2	SH3BP5	CDON
DYRK1B	URGCP	AKAP3	BCKDHB	NVL	LDLR	EWSR1	DGKE
GALNT14	WDFY3	ZMAT2	AKR7A2	STOM	CHAC1	GCAT	CORO1B
LAMB2	EFNA4	SSNA1	CREM	SLC9A3	TGOLN2	GEMIN6	MALL
PITPNC1	SESN1	NECAP1	NRBP2	METTL1	EPS8L2	FAM161A	SEMA6B
SLC29A1	BCLAF3	RPL31	CCDC97	RAB31	ARHGEF3	PPP6R1	IL15RA
PBRM1	TSTD1	DNAJA4	IRF5	IFT22	MYEOV	RAP2C	DOCK5
ADIPOR1	CEP112	OCLN	TMEM191B	ANXA5	PDE4B	GRHL1	CXXC5
PDK3	PCDHGA8	MTURN	SIK2	HARS2	KLF3	ABL1	GDA
DLL4	RBM47	PSMD8	ZNF609	BOP1	SRCIN1	GAS8	CD9
FBXO16	TMOD3	PARP2	AP5M1	EIF4A3	HDAC10	CASKIN1	SPATA20
PELI1	RHOBTB3	TTC39A	DET1	ZSCAN16	MZF1	EXOSC6	TBC1D32
OASL	TRIM7	PRDX1	ITPR3	SAP130	STYK1	FBXO46	SNTA1
ULBP2	ZNF813	AURKB	GSTT2	ZNF324	AQP3	RPL7A	KIFC2
SLC4A2	VPS13C	DNAJB5	GSTT2B	WDR74	AXIN2	BORA	ANXA3
POPDC3	ZBTB34	CEP250	TSPAN18	UGDH	ESPN	THOC7	FAM172A
NOCT	SPTBN1	NT5C3A	LAMTOR3	SEC24D	ADAP1	EXOSC3	CST6
TRAPPC4	ZNF850	ZBTB11	USF3	DLD	OXA1L	RBBP6	OBSL1
POLG2	ANKRD28	THAP11	BID	RRP8	TSPAN4	CYTH1	CAPN1
SLC9A5	DENND1A	MYL9	RNF170	MIS18A	PRICKLE4	SERPINH1	METRN
ITGB1BP1	ID2	UBE2E2	PLBD2	CDKAL1	HEMK1	SRP14	DUSP6
RNF125	EPHX2	NAA25	ABLIM1	IMP3	FRAS1	ESCO2	KIRREL1
FSTL3	DECR1	HRH1	CXCL16	MDFIC	C2orf15	AK6	C1orf159
SMPDL3A	MCC	MDM1	PXYLP1	SEPHS1	TNFAIP2	SLC4A7	ECHDC3
FCHO2	ACYP2	CDC20	FNBP1L	PWP2	CYP4F3	ZBED5	HINT2
SLC36A4	STOX1	SREBF2	ZNF91	MPDU1	ADGRE5	CTPS1	AHNAK
PLCH1	PRRX2	ELOVL6	TSPO	FBF1	VEZF1	DDX5	TMBIM1
GPR173	C6orf132	SAMM50	FAHD2B	GTF3C6	DBP	RSRC1	ATP6AP1
GRB14	PDCD7	GPR89A	ANKLE2	CSTF2T	ELF3	UTP4	TRIOBP
AGAP2	MAP3K5	KIF11	NKAPD1	TIMM8A	MIGA1	POP7	FBXL19
GNG12	FAAH	PHYH	CRYL1	RECQL4	C2orf72	R3HCC1	FAAH
HTRA2	FNBP1L	CIP2A	PDE4B	MRPL36	TTC9	VPS26B	SP140
PFAS	C20orf96	TMEM208	RBL2	MAZ	EPHA2	GOT2	BMP1
PPP6C	TBC1D9	SLC35B4	RAPGEF1	ABRAXAS1	ITGAE	MOGS	MYLIP
CEP164	ZNF627	RRP8	HSPH1	GNPNAT1	PRKAG2	GMFB	UGCG
JPH1	CCDC69	TM7SF2	TMEM254	SF3B5	ADCY7	TRMT112	JUP
VASH2	TMEM104	KIF20A	CARNMT1	USP7	SEMA6B	TEFM	B4GALT7
DNAJB5	SLC2A1	NIFK	TNS2	TRAPPC4	NPDC1	WDR46	RAVER2
ERVMER34-1	OPN3	BCS1L	CD82	SAFB2	CHPF	SRSF6	TOM1L2
NPR2	ARVCF	ESYT1	DLGAP4	MFAP1	DUSP6	PAWR	NIPA1
PLCL2	AASS	SLC4A2	MAP7	ZBTB17	SLC39A11	SFR1	RNF144A
HDDC3	GLCE	OSBPL6	ITPKC	TBCCD1	CCDC88B	RAB5A	FHL3
GALK2	MPP7	TMCC1	EFNA4	MCM5	COL6A2	RLF	NUP210
TCIRG1	PRKCA	PPP2R2A	CNPPD1	MIIP	CBWD2	AGL	MED25
TNRC6A	ZNF430	CSTF3	SMAD1	APBB1	NOS3	WSB2	DTX3L
PIF1	ARL15	ADK	TMLHE	NGLY1	EVPL	MLLT6	NCAPD2
RBP1	DHRS4L1	GRB7	ZNF532	CCDC136	PBLD	PGD	GNPTAB
RHOV	KLHDC4	DFFA	ZNF266	TADA1	ARFRP1	PARL	RNF11
RFFL	LCOR	FITM2	KPNA4	UBL7	PFKFB2	UTP3	CYTH4
SH3RF1	AACS	NPAT	ZNF431	SF3A3	CC2D1B	SKA2	CD63
ZDHHC12	HSPH1	RPS15A	TATDN2	MAML1	SDC4	TRAF4	PCDHAC2
DDIT3	RNF122	PHTF2	PKD2	NCAPG	SLC2A6	TCOF1	STK26
FYN	NCS1	TUBE1	IRAK1BP1	FAM200A	TMEM92	NDUFB10	CD59
HMGCR	RAD50	MYO1C	ZNF146	DVL2	COASY	SIRT1	SLC35G1
NOLC1	PAX2	GCLM	ERAP1	COA3	MGMT	TBRG1	MEGF6
SLC29A3	ZNF133	BSG	SOX13	RAB3A	TMEM159	DBF4B	LZTS3
ZNF367	FHDC1	FAM118A	CEP131	POLR1D	ADCY9	EIF4E	SLC39A13
TMEM256	TRIM2	PPP1R26	FZD6	TBP	KCNS3	DECR1	IL10RB
CENPBD1	ZNF585B	TRPM7	IBA57	WDCP	ENTPD2	DPY30	ETV6
VMP1	ARSD	UBE2C	BCL2L2	CHCHD4	FGF9	MAF1	HLA-DMA
ESRP2	FGD1	MSMO1	GSTZ1	TRIP6	LMNA	MRPL30	DPH6
SLC16A1	ABLIM1	HDDC3	PLPP3	RGMB	NECAB3	C11orf58	TNS4
ESYT1	CHDH	EHD2	ADCY6	MALSU1	ZFP36L2	RERE	BMP2K
CLDND1	CCNJL	UBE2T	UNC119B	BRMS1	TYMP	PNP	VAT1
BORA	PSD4	ARMC8	NINJ1	SURF2	SLC4A3	TRMT2B	SLC25A40
NDUFAF7	ZNF443	ALDOA	CTSH	RCAN1	SH3PXD2A	SMC4	EGFR
MYOM3	MFHAS1	PIGL	INO80D	SRSF6	TRIOBP	TMEM68	EBAG9
RTN4RL2	KIAA1549	TAF10	CEBPB	MTERF3	ITPR3	ASB3	PYCR2
EED	NOSTRIN	PPIL2	UBE2F	STIM2	CLDN23	CACUL1	BAZ2B
DAGLB	SYT7	GLG1	UBE2J1	ETFDH	NOTCH3	TOP2A	MATN2
PANX2	AZIN2	BBS4	FMNL1	PYGL	GDF11	VPS33A	HUS1
SMUG1	RAB11FIP4	LAGE3	GLB1L3	CHAMP1	RBMS2	FBXL18	CLMP
C12orf65	ZNF699	CHMP2B	TUBA4A	CEP97	FSTL3	HMGB2	WIPI1
NOL3	RBL2	SYNGR2	TP53I3	DCAF12	ZNF365	TSPYL2	ANKLE2
UACA	POMGNT1	SLC7A6	BOK	ZNF580	DNPH1	SPDL1	SLC12A4
TMEM169	CCNG1	ZWILCH	ZNF862	FKBP14	ABR	COMMD3-BMI1	RBL2
KIAA0586	TNFSF12-TNFSF13	USP53	DCAKD	YY1AP1	PPARA	SRSF9	PPIP5K1
DPAGT1	ADAT2	FAM71E1	RSAD1	YJU2	SULT1A1	SRD5A3	CTSZ
EIF5A2	BCKDHB	NT5DC3	RAB5B	PMF1	PLOD3	DHX40	KLF6
CHTF18	EDARADD	MIA3	ZNF280B	LRFN1	FMNL1	TOP3B	KDELR3
CTSB	KIRREL1	CEP192	C16orf95	DPH5	EBF4	PGAM4	MAP1B
UBE2T	EIF4EBP2	ARF1	MATN2	EIF2B4	HES1	RYBP	VWA5A
IPO11	GLRX	YIF1B	SOGA1	SYTL3	ANKH	SUPV3L1	SLC4A3
PTRH1	CGGBP1	GMPPA	MED23	MRPL15	C16orf74	SYK	ADGRG1
STK17B	ZNF503	SRBD1	ACOXL	PYURF	TMEM87B	UBE2S	SH3PXD2A
ADAM9	BAIAP2	ZBTB5	CD2AP	DLGAP5	PIGQ	WDR6	FAM13B
RRAD	MAP2K5	RIN1	SLC2A1	DECR1	CTSH	RFTN1	CLDN23
PUS7	WTIP	NOLC1	STK11IP	PIGY	ALG10	ZRSR2	RHOD
ERRFI1	RAB6B	HERC5	EPDR1	ALDH1B1	SMIM20	HBS1L	TTC19
TBL1XR1	MLLT6	MCOLN1	FBXO44	ABL1	APBB3	OGG1	PIGP
SYVN1	UPK3B	CENPU	SOCS4	LHX2	NUCB1	RRP15	IPP
GPS2	GPSM1	YY1	PRRG4	GATB	EPHA10	RELB	ALG5
SOAT1	SGSH	JUND	ADA	KLHL13	NTSR1	YJU2	FBXO6
YPEL2	CMTM6	ALKBH6	ZNF195	SPNS3	TMTC2	PPP4R3B	PARD3
EMG1	EFNA2	RPS24	CHKB	WDR46	DMPK	CCP110	SLC27A6
ST3GAL1	TIAM1	RFFL	AGA	GLUL	PSME1	ZNF629	ZNF746
SYNJ2	SREK1IP1	ATP2A2	LACTB2	ST3GAL1	ARHGEF5	DHX30	VASN
DUT	KIAA1522	CCDC91	PLEKHA8	TEC	POMGNT1	POGK	NAGLU
COA4	GALNT11	MASTL	FAM241B	DNMBP	JCAD	HJURP	IRF2BPL
GJC1	IDUA	ACADM	LNX1	ATPAF1	PTK7	RPS3	ITPKB
TMEM65	HHAT	MLKL	FAM169A	PEX3	MYO5B	DIABLO	TRPM4
BRWD3	MPP1	MTRNR2L1	CHCHD6	MPLKIP	MICALCL	SERINC5	TRIM68
TFR2	ZNRF1	GPR89B	USF1	KNOP1	FXYD5	LETM1	CST3
MEGF6	COQ8B	HIVEP2	HIPK2	PIAS1	SMPD1	FDX1	CD44
GLRX2	HDAC11	COQ3	LIPT1	TRIT1	OBSL1	PCNA	P4HA2
PARS2	MAGEE1	WDR44	OCIAD2	ERCC1	DLL1	SCAF11	RBM26
KCNG1	PON2	ATG4C	HPF1	GPR63	USP24	SH3PXD2B	SH3BP4
CTSV	ABCD1	C16orf72	DTX2	NAV1	CD109	DDX23	CBX7
SF3B6	CDAN1	PHGDH	BRF2	PDCD2	FAM3C	CAMSAP2	FOXN2
TAF5	HPF1	AGTRAP	SLC45A4	CFAP298	RBCK1	MKRN2	IFITM2
LEPROTL1	ZNF195	TTC32	ZNF354B	CYB561D2	ELMO3	CYC1	RAB5B
CCDC51	CD109	PLOD1	PROSER1	ZNF281	MVP	PHB2	FAM3C
MLH3	MVP	DNAJC18	SPTBN2	FANCG	ETV6	MRPS26	EVA1A
ELOF1	ENTPD4	HNF4G	ARHGEF16	ANKDD1A	CPNE2	THEM6	TMEM209
ARHGAP40	ZKSCAN1	PPP1R15B	PHLDA3	JAGN1	CPPED1	RTF1	LRAT
PLOD1	TPRG1L	SLC3A2	ZFC3H1	GALM	BRF1	RPS15	PTK7
UQCC3	GALNT5	NR3C1	ADAT1	PHF10	IRF2BPL	NUP54	TMEM87B
DFFA	GLB1L3	AK6	SLC2A13	GOLM1	DPY19L1	OSMR	SPTLC2
ZNF22	BEGAIN	KLF16	ORAI2	SLC4A1AP	RRBP1	CD55	C12orf66
GMNN	ANKRD6	PFDN2	BIVM	AGK	VPS36	NAA25	P3H3
SRBD1	SIRPA	LSM4	TBL1X	RAB15	PARD3	FRMD8	MAP3K5
ZBTB37	WWC3	PRSS3	ABCA2	SUPT7L	SEC14L2	FUS	KCNN4
MRFAP1L1	ZNF221	TAF12	RBM41	GALNT10	MYL9	RPS4X	CBFA2T3
SOX12	PLEKHB1	SERINC3	CCNG1	DDX28	NCAPD2	RPS11	CD109
MOGS	DSC2	ALAS1	REEP1	PDCD2L	BCL2L1	CDCA3	EFNB1
ALG9	SEMA4C	PNPT1	SLC35G1	CCNE1	DEAF1	MBD4	ILK
CDKN3	SLC35E2A	EPB41L2	KHDC1	UBXN1	DENND2D	EDC4	ZBTB4
CSTF3	BORCS7	WDR61	GBX2	SHQ1	VASN	PTER	FAM102A
SUN2	AADAT	LTBR	CYP2R1	MRPS27	H6PD	KPTN	LYRM1
CNPY2	RNF38	C11orf54	URGCP	BRD3OS	ADAM11	RPP30	PARP12
CYP4F11	BCL9	KIAA0754	ANXA9	ZMAT2	SSH3	RPL22	TNS2
MIDN	TNFRSF10D	SSR1	TNFRSF10B	ZFP90	NUP210	ZNF330	PTAR1
CCDC14	UBE2Q2	VRK1	ALDH6A1	FAM76B	ATP1B1	ATE1	HPCAL1
PELP1	PWWP2B	INTS5	SMG9	ZNF330	ABCB6	RPL10A	ZBTB38
HPRT1	BCL7C	RPN1	NOSTRIN	C18orf21	PYCR2	IFNGR2	AIG1
MZT1	ZNF559-ZNF177	TMEM65	MACC1	LETM1	ECE1	ETFB	ITGB3BP
KPTN	ZNF771	TOMM20	ZNF816	ARIH2	ITPKB	PEBP1	KCNG3
AK1	MIGA2	BRAP	SYT7	ZC3HC1	LRAT	KCTD10	TMEM175
ANP32E	SLC9A7	CCDC122	DIP2C	ARHGAP10	FBXL2	PTGES3	HERC6
CISD2	CNPPD1	ZNF394	LAMA2	PSIP1	ANKLE2	RBM42	CYB5B
HSD17B11	RUNX1	DVL1	ORC6	WTAP	CD82	DIMT1	RTN4R
TMCO1	PREX1	PAM	TRAK1	SLC25A1	TIAM1	AMOTL1	CYB5R4
ATF6	USF3	KRTCAP2	SMYD4	DHRS7B	ADGRG5	TBK1	SAMD9
YIF1B	L3MBTL3	PIGA	CHMP4C	TPP1	LZTS1	SNU13	TMX4
C1orf112	NUB1	WDR34	OR51B4	LRP5L	PC	BOLA2	ZFAND2A
FAM86C1	TOLLIP	ARHGEF39	ZFP14	ESPL1	MAN2B2	MTREX	TICAM2
SLC16A7	CHPF2	ZMYM1	SMO	DDX20	NIPAL2	RFC5	SGCB
NASP	TTC9	GNB5	LAMTOR4	ZNF8	BMP7	UBN1	DPY19L1
TPX2	REEP2	TMEM14A	TPM2	NGRN	CDKL3	GRIPAP1	SECISBP2L
SMS	FAM20C	PNP	ZNF680	TBCC	RASA4	TXLNG	EZR
CETN3	ARMC9	LAMC3	CDC42SE1	NOP2	DES	ATP6V1A	AKR7A3
AGTRAP	OSBPL1A	PREPL	TNS4	HEXIM1	CNTNAP3B	PHACTR2	USP24
MRPS18C	TMEM221	PDE4DIP	APOOL	SUPT5H	PORCN	DCAF12	DEPDC4
CCNA2	DET1	CLCN2	NCOR2	METAP2	RET	ODC1	ARF5
ZNF619	PRDM16	PRDX3	ID2	CEP76	USP35	AKT1S1	CC2D1B
CHCHD3	GRHL2	PRPSAP2	ZNF136	ISY1	TCTA	ATXN7L3B	EPS8L2
TYMP	ZBTB47	TMX2	DCTN4	CCDC58	PDE11A	CLP1	RAB37
PILRB	ATG10	MESP1	ING5	FOXRED1	EPS8L1	ALAS1	CHPF
TIGD2	GLIS2	CHCHD3	VSIR	INAFM2	CLMP	GCNT1	UNC5B
PUS3	DLGAP4	SLC17A5	SOCS2	C1orf198	PEX11G	POLR2F	LMNA
ESCO2	ULK2	THEM6	FAM168A	HTATSF1	NFIB	ACAT2	SHISA4
MCM6	INO80D	PFDN4	RNF43	PRIM2	SH3KBP1	TACC3	TMEM106B
ENC1	ZNF81	SLC25A11	LGALS3	HNRNPA1L2	GALNT12	BRD8	GPER1
TBCCD1	ALDH5A1	UQCC2	MRPL49	ZBTB5	ATP8B3	TUBB4B	ARHGAP18
ARHGAP4	SHOX2	CUTC	KDF1	RBM25	ST14	SEC22C	CLMN
AFMID	ANKRD10	SGO2	RALY	MCM6	MBP	DRG1	DCLRE1B
DARS2	ACAA2	ENDOV	ZSWIM7	SIN3A	MUC3A	TICRR	MYEOV
BLMH	PRKACB	TRMT112	FAAH2	MDM1	IFITM1	DDX46	CTSH
CDCA7	FAM117B	KPNB1	OSBPL5	PASK	ANKRD34A	ARHGAP21	WWTR1
ARF4	LAMB3	SPAG9	FAH	EXOSC10	WIPI1	HCFC1	ABL2
CHMP4A	PTGR1	TRIP6	PLSCR1	GTF2IRD1	RHOD	ZKSCAN1	TIAM1
PLS1	IFITM2	ANO10	TXNL4B	DYRK3	FOLR1	C1orf112	LSM14B
TMEM123	GCA	RPL36AL	USP2	GNL2	TNFRSF18	CRLS1	KBTBD4
SAMD11	ZNF341	SRGAP2C	SNTB2	SNRNP40	C19orf57	PSMD7	VPS36
ACSL5	ARMC4	SDR16C5	SLC9A7	TOP3A	ABTB2	TIMM23	CD58
SELENOT	KIAA1958	EEF1AKMT1	VAT1	TBC1D31	SLC39A13	PRKD2	SLC35F5
ABCC2	FBXO44	KLF10	CD109	LMNB1	ALDH3B1	MSANTD3-TMEFF1	MYO5B
MYADM	TXNRD3	POFUT1	GNB1	RNF44	CAMK1D	NUP62	MMP24OS
HINT2	TNS4	ESRP2	DBNDD1	TP53RK	FMNL3	TMEM69	SMG9
GRN	FAM83F	ERCC1	RFXAP	PSMD7	TMX4	BSPRY	MEIS2
MMAB	COMMD7	APOO	FIG4	COA7	BTNL9	BAZ1A	BCKDHA
CCDC122	ZFAT	GRK6	WEE1	ZNF777	EFHD2	NFATC2IP	ASTN2
NKIRAS1	UNC119B	SLC39A6	SMARCD1	ILF2	DMTN	BOLA2B	ENDOD1
YIPF6	SLC25A6	VPS13A	SPECC1	ISG15	DHFR2	LMO7	ZNF558
GVQW3	PLEKHG3	MRPS17	PTGR1	PPWD1	TNFSF12-TNFSF13	RPL36	CTSD
MDP1	SOX8	NCKAP1	ARMC9	UHRF1	AKR7A3	ANAPC2	IGSF9B
IFNLR1	POLR1D	CD3EAP	PHLPP1	EED	TJP3	VAV1	JAK1
SLC26A2	STYK1	SIPA1	ETNK1	CBY1	B4GALNT1	PBRM1	SH3KBP1
INO80C	TMEM143	LGMN	IGSF9	HNRNPA0	MYORG	PSPC1	MGST3
MRPL57	C17orf75	RFT1	CHD1L	ANAPC5	PRICKLE1	GTSE1	FAM111B
GABRD	MPRIP	TRIM25	CHDH	RNF114	DCUN1D3	CHCHD1	GPR173
PLP2	NRBP2	MRPS10	TRAPPC13	IQCG	SCML1	PPWD1	TIGD6
CENPE	SNX21	ZNF207	ABR	TRMT5	FA2H	RPS6KB1	C16orf95
ZBTB25	SEC14L4	SS18	CBX4	ELL3	UNC5B	DYM	SDC4
KIF11	LMO2	SLC19A2	ZBED4	PHKA1	MGLL	STK10	JCAD
PPIL3	FGFR3	TMEM106C	ZNF37A	TARDBP	JAK1	PRKRA	ADCY7
ASL	EHD1	THOC3	ZNF3	USP10	ADGRG1	FAM234A	SLC27A1
CELSR3	TNS2	SPSB3	ESRRA	NOB1	CYP1A1	SNW1	CYP4V2
PMAIP1	PIGX	C19orf53	DDX59	LDAH	LEPR	P3H1	GPRC5A
GSTCD	PHETA1	RAD51C	WDFY3	MRPL32	CYB5D2	DDX3X	GPR160
CYP51A1	CCDC120	ENO1	PTAR1	CEP95	SMG9	PWP2	POMGNT1
TIPARP	CDK14	TACC3	TOP2B	MVB12B	MYOF	LUC7L3	OXA1L
NPAT	KCTD1	RAD21	LTBP3	SIX1	AHNAK	ILF3	RGS20
ATP6V1A	POC1B	NAXE	APP	PELI1	METRN	MTA2	ARFRP1
FYTTD1	EIF2D	JAGN1	FBXL16	DDX5	PXDC1	WWOX	B9D1
PLD6	RALGDS	ARHGAP4	GABARAPL1	RAD54B	SLC9A2	ZBTB11	BRI3
BCS1L	PRKX	BLMH	SESN1	CCDC149	SLC49A3	SRSF10	DST
UTP18	TNS1	NVL	MVP	CSPP1	ENDOD1	METTL2A	NR2C2
HFE	STAU2	ARF4	RNF122	PPIL1	LETM2	PRKAG1	IL17RB
SLC38A3	ELMOD3	BOLA3	TPRG1L	SLC52A3	ERFE	BMI1	FA2H
STPG1	PARP3	SASH1	RHOBTB2	TFAP4	CTSD	EIF4A1	AHR
BTN2A2	TOP2B	SUN1	THAP9	SIRT2	OBSCN	HNRNPAB	USP31
LMAN2L	CD83	ELL2	ZFHX4	KPNA1	ARSG	CCDC88B	CNTNAP3B
TRMT12	SMG9	CKS2	PAIP1	ERCC5	RNF213	CNTROB	NT5DC4
SSR3	AMOTL2	WDR60	SPRY4	TAF6L	OLFML2A	MSL2	GLIS2
ZNF620	SFMBT1	INO80	LPIN1	SCHIP1	MFSD14C	CASP6	TGFB1I1
UBE2E2	MDM2	MAPRE1	ARPC4-TTLL3	IQCJ-SCHIP1	MMP25	REPS1	PTPRJ
MTSS1	NT5DC2	NEMP1	STK40	PTPN2	FUOM	PGM1	TMEM65
TCEAL4	PAPSS1	ZNF283	ARHGEF5	YAF2	P3H3	PNN	TOB1
SLC19A2	ZNF91	HAUS6	RBM47	IRGQ	TMEM143	GLA	GRIN1
NUMBL	SPATA13	PCNA	POFUT2	CMSS1	PITPNM3	SDHAF2	BFSP1
ADAL	VAT1	IDI1	ZFAT		MYO1E	CDKAL1	ITGA6
IGF2R	STARD10	B3GALNT2	SLC5A3		ITGA6	DPF2	CCDC103
RNFT1	SPTB	DNMT3B	MED18		SCARA3	TGS1	MAP3K6
NME4	UBR5	KIFC1	FAAH		KREMEN1	ZPR1	MED7
ATP6V0B	TTC19	PDK2	C12orf73		TMEM120A	UBE4B	NUBPL
CCS	MACO1	PNO1	TET3		PAQR8	SART1	KCTD3
SDHAF3	EXPH5	UTP6	WNK2		PDGFA	GLMN	ABCB6
GRIPAP1	HOXC6	NXT2	KDM5B		APC2	LRCH3	ALDH3B1
EOMES	PSEN2	PNRC2	TECPR1		PARP9	STMP1	MYO15B
M6PR	ZNF436	GNG12	B3GNT7		NHLRC3	AGO1	ATP1B1
CHST11	CAMK1	RRM2	RUNX1		DLG4	NOL6	USF3
GRAMD1B	RAB11FIP3	C8orf76	VAMP8		ELFN2	PITPNA	CSPG4
PTPRH	ZNF525	TOMM6	UXS1		CRYBG2	RAP2B	DUOX1
NDUFS8	PRICKLE4	CSPP1	PTGFRN		SLC20A1	UQCR11	MOSMO
SERINC3	DTX3L	TPRA1	SIM2		DUSP22	PABPN1	ORAI2
DMKN	KPNA4	TRMO	M1AP		GPR37	FKBP4	HLA-F
SLC2A11	DOCK3	RPF2	CDC42SE2		ARSA	SF3A1	HES2
OSR2	WWOX	ZNF182	ASF1A		WWTR1	GIGYF2	NOTCH3
CCDC58	TNKS	FASN	RNF24		CMTM7	RBM6	CMTM7
TBL3	ANXA4	EED	CSRNP1		ZFYVE28	NOP9	NOS3
JAGN1	FKTN	MID1	ZFAND3		KCTD7	RPS25	SLC16A5
FBXO48	MED9	ACADVL	CACNB3		UNC13D	VMA21	ATOX1
SMIM29	CREBZF	OSBPL10	ZNF689		MAPK11	PSMD3	JAG1
MARVELD2	SERINC2	DEDD	DNPEP		SH3BP4	PSMG3	ACOX2
PLPPR2	NUDCD3	RELL2	BAG5		NUAK1	APPBP2	PLOD3
RANBP6	ZSCAN9	POP1	ZNF45		OSBPL5	PAICS	LYST
ZNF385A	BRSK2	YEATS2	STK25		CRIP1		SSBP2
PWP2	CSRP1	PTPN6	RRBP1		NGEF		DCBLD1
PIGM	PLEKHJ1	TAF5	NBDY		FPGT-TNNI3K		ANKH
CHMP6	ZHX1	S100A13	XPA		HPCAL1		LMBRD1
C19orf12	ARID1A	TMEM69	EPHB2		LYRM1		MLH1
ST3GAL2	PICK1	ASB6	TMEM41A		ZNF385A		B3GNT7
TNFAIP8L1	IFI27L1	USE1	PEPD		PCDHAC1		DMTN
SLC41A2	ZNF512	ATAD3B	CACHD1		PARP12		PSME1
MAP2K4	CD2AP	EID2	UBE2G1		BMP1		EML3
STT3A	SMYD2	MELK	ZSCAN9		TMEM198		TMEM25
NUF2	NINJ1	ELOVL5	IRAK4		TMEM40		TRPC1
ITGA6	SH3GLB1	RANBP6	TACC2		PCDH1		PARP9
PRADC1	CECR2	WDR26	RUNX3		LDHD		CYB5D2
SHQ1	SERF1A	PMS2	RCOR2		JAG1		NGEF
FOXO4	SERF1B	P4HTM	LIMD1		SLC37A2		TTC37
BTN3A1	PHLPP2	UNC13B	BRI3		FMO4		SEC14L2
FAM131C	ZNF586	MICU1	RANGRF		TNS2		PLAU
RRNAD1	CACNB3	RAB3IL1	RNF217		MED25		CLDN12
ZNF691	LIPE	C17orf80	SAT2		SH3D19		FAM149A
HRH1	TUBA1A	RPL36A	ANKRD28		ACOX2		PRDM5
ZNF77	APBB3	IER2	NTSR1		AHR		SULT1A1
MANF	GXYLT1	NCSTN	MCCC2		LDLRAP1		CAMK1D
GINS4	MEGF8	TARDBP	VEGFB		ROR1		DLL1
TRIB3	CYP4V2	MRPS7	MAOA		SLC16A5		KISS1R
OSBPL10	LRP3		MAD2L2		EHD2		COL12A1
POLR3B	ZBTB33		CPPED1		KIF21B		AXL
ALG3	AK4		MOSMO		PIK3AP1		OSTM1
CDK1	ST3GAL6		STYK1		DNASE1L1		FAM210B
SERPINH1	KIAA0319L		ATP13A2		KCNN4		SLC20A1
UNC13A	ARMC7		ARPC4		POU2AF1		AXIN2
NEBL	ETNK1		USP38		PBX3		HOMER3
FITM2	ERMAP		METRN		PTPRJ		GPC4
DGKA	CHCHD6		SETD4		POPDC3		GHDC
COLGALT1	MMD		NPC2		HES2		MACF1
NVL	SOGA1		PCBD1		TPCN1		PRICKLE1
ALKBH6	FBXO41		ZBTB39		HOMER3		ELMO3
TMX1	SUCO		LPGAT1		ANXA3		CPNE2
NCEH1	RSAD1		MYO1B		FAM102A		MINDY2
CCDC191	PARD6G		GMIP		DNAJB2		COL18A1
XPNPEP3	C9orf16		NSD1		CORO2A		TMEM120A
GTF2H2C_2	ATRX		ERI2		ATOX1		PEAR1
TOMM40L	ACAA1		UBTD2		CBX7		TEP1
LETM2	AK3		PDE7A		EGFR		ABR
PEX11A	CORO1B		DHRS4		NRBP2		CRLF1
RAD51C	BMPR2		SLC30A9		KLF6		ENO2
ITGB4	CCDC40		TK2		OTUB2		LPGAT1
LYPLA1	ZNF688		LLGL2		EFNB1		ZNF385B
NECAP1	FAM13A		DST		CLMN		PPL
DUSP11	SAMD10		PPIP5K1		B3GNT7		MMP17
ATG7	CRYL1		MLXIPL		HOXB6		SCRN2
LYRM2	CTDSP2		TRPM2		MEGF6		ABCD1
C11orf24	ZDHHC23		B4GALNT4		CYP4F11		MGAT4B
ACADVL	LRRC8A		FAM185A		METTL27		GSN
ANKRD12	MSI2		ARRDC2		GNAZ		FBXO2
DNAAF3	STX7		EFCAB14		COL18A1		PRKCG
AOC2	INPP4A		SLX4IP		GPRC5A		STMN3
VSIG10L	KCTD7		MINDY2		EML3		SLC44A3
SCLT1	P2RX5		CROCC		NR3C1		EMB
RNF25	RECQL		ZNF548		ABCA2		TMED4
MRPL28	NHS		UBR5		SLC27A1		FSBP
THAP7	SMARCE1		CEP70		GSDME		MCOLN3
ZCCHC10	FOXP4		NUDCD3		CGREF1		SMIM20
STIL	KIAA1217		PSEN2		ULK2		CXCL16
TSC22D2	HMSD		MACO1		LIPT2		PLK2
CEP126	TET3		PTPRG		CRLF1		EHD2
RABEP1	FOXA1		CHST15		GRIN1		MTUS1
TAF4B	ADA		BSDC1		OSGIN1		MPP3
UHRF1	PALD1		OAT		TNS4		NCAM1
C8orf37	SELENON		SRP9		RASSF8		FMNL1
MCU	LRRC24		TMEM191C		RAB26		TSPAN7
PDK2	TBC1D16		SCOC		MYO7A		ARPIN
NR2F2	DDIT4L		FHL3		TMEM8B		SYT1
LYSMD1	EPHB4		RGS9		CELSR3		MYO1E
PQBP1	FAM241B		SFT2D2		BTC		SYBU
SPRY1	ZNF714		PACRGL		RASA4B		SLC7A11
PPP2R2A	NKX3-1		ZBTB33		CHSY3		PTPN14
PPP2CB	KREMEN1		RASSF3		ZNF704		DNAJB2
MRPL1	CDC42SE1		GGA1		SMIM29		SYNGAP1
LBHD1	PLAGL2		POLE2		SULT1A2		FXYD5
RALGAPA1	KLK8		PCDH7		S100A4		HSPG2
ZSCAN5A	FAM24B		PIGX		RNF182		PGGHG
RUSC1	TCTN1		FBXO2		RIBC2		KHDC1L
STX1A	SNTB2		NKX3-1		RAB3B		PLEKHH1
PROM1	DUSP3		GPALPP1		ENO2		COASY
THEMIS2	DIDO1		UBFD1		TOM1L2		APOBEC3B
NDC80	CDKAL1		NR1D2		EMP3		AAK1
CHKA	TMEM164		ALG10		MYOM3		ITGB4
HYLS1	SPTLC2		FXN		MAMDC2		CRIP1
JUNB	ANKEF1		ING4		TGFB1I1		PPARA
FES	ASF1A		EPHX2		IRF9		ABCA3
SRGAP2	BAK1		PTPN1		PPM1H		NIPSNAP3A
DVL2	PIAS3		PRKAR1A		NUBPL		CDC42BPA
CEP104	FAM89B		ATXN7L3		ASIC1		EPS8
EXOSC3	RTN4R		RAB30		TMEM253		STYK1
BBOF1	APP		GPRC5A		CSF2RA		C6orf62
IGF1R	PLXND1		ZSCAN30		ADAMTS16		PLXND1
C11orf98	DIAPH2		RAB27A		CXCL16		FNIP2
TMEM182	PAK6		FRMD8		PLEKHB1		SLC41A3
C18orf32	SLC5A3		PPIC		KRT7		CACNA2D2
DYNLT1	MAGEA3		DYRK2		CHRD		LPAR1
CKAP2	ADAM10		CEP170B		USH1C		TSPAN4
NXN	LEMD2		KLHL22		HIVEP3		TTC39B
TMX2	PRIMPOL		KHNYN		LYNX1		NFATC2
AATK	IGSF9B		ADAMTSL5		ADM2		HTR1D
TMEM216	TMEM150A		ZDHHC18		PACSIN1		DUSP22
ATP2A2	TOM1L1		PRKACA		KAZALD1		EMP3
IFI30	FBXO10		MAP3K6		SLC16A6		GSDME
CHID1	RBBP8		MAP2		MATN2		GNAL
GALNT18	EPHB2		ZCCHC3		AXL		DES
FAM200A	CCNE1		GNAQ		TM4SF19		KRT32
ALOXE3	BCR		PIP4P2		SYBU		CLIC3
TIAM2	PHLPP1		AFAP1		FBXO2		OSBPL5
TAF3	PCDHGB2		ZFYVE9		PLK2		STEAP2
CRIPT	KRR1		UBE2E3		SLC8A2		MAN1A1
STIM2	ABHD17B		MSI2		TMC6		RNF215
C4orf3	NPDC1		POC1B		ACE		BCORL1
ZNF19	ATXN7L1		PDRG1		HECW1		ARV1
MAN2B1	MYH14		SMARCA1		SYT3		SLC16A6
ELOVL6	TSPO		CDC42BPG		S100A2		H6PD
PSMG3	METRN		BRPF3		ODF3B		CYP24A1
CENPM	CCM2		RAD54L		EXD3		IFIT1
C9orf72	UBE2F		IL17RA		IL15RA		ATCAY
TYSND1	TACC2		TGIF2		RNF215		NR4A3
CENPS-CORT	AMACR		ZSCAN21		TNIK		GLCCI1
RASA3	ZNF695		GPR63		HECTD3		IFIT3
SLBP	LRIF1		ATXN7L3B		STMN3		SOX9
GPAA1	DTX2		UTRN		AHNAK2		NIPAL2
DNAJC17	NSD1		MAGI1		FXYD1		ETS1
CENPH	SELENOH		RND3		PDGFC		TMEM92
HNF4G	AFAP1		ZNF669		TCEA3		CCDC142
RAD51AP1	SFT2D2		ECD		EMID1		KLK8
GREB1	ZNF33A		LCOR		PPL		ZFP41
SSR1	SH3KBP1		UBE2I		RPS6KA1		SHOX2
POP1	ZNF524		MPND		NIPSNAP3A		METTL7B
POC5	SMARCA1		SP140L		SNCG		NUDT8
SEPSECS	TGM2		STN1		ITGB4		TIMP2
PROCR	ZNF354B		RAB11FIP4		ENKD1		LDHD
ZSWIM9	RILPL2		MPP7		APOBEC3B		TNFRSF11A
VPS13A	CAMKK2		RASAL1		ABCD1		SECTM1
GLG1	CRADD		ADGRF1		OR51B4		CDA
MRPL22	HIPK3		TFE3		CDA		SULT1A2
TBC1D31	TADA3		RBBP8		RAB37		HECTD3
GSR	PIK3C2B		GALNT7		STK39		STK39
SLC44A1	PTPN21		RAVER2		IDUA		CD99L2
ABCA5	LEPR		FAM13A		COL12A1		ALOX5
TRIML2	PPP1R9A		TIMP1		GABRG2		ADGRB1
RNF149	BSDC1		SMAD5		TRIM2		GRK5
ZFP41	SPIN3		WRN		GFI1		ZNF239
DLGAP5	CACNA1B		ZNF624		NUDT8		KRT7
RHBDF2	ANKRD52		SLC25A35		CSF1		KIAA1324
KDELR3	PARP8		TOM1L1		SPTSSB		FXYD3
CREB3L4	EML5		VPS18		F8		SATB1
PGRMC2	PLEKHM1		KANSL1		KCNC4		NR3C1
SHCBP1	AMIGO3		RAD51B		NR3C2		RUNX2
TMEM183B	RYR1		ZFAND5		CDK18		ETV7
SELL	METTL7B		MPP3		CA11		ENKD1
METTL18	SPIDR		ATMIN		MAP4K5		PELI2
GDA	TCEANC		ATP5MC2		KISS1R		ITPR2
SNF8	FTO		ZBTB20		SLC22A18		OLFML2A
KRT222	AIG1		SKP2		FAM189A2		PPP1R3E
WDR44	SH3BP4		TRIM44		KLK8		REPS2
ATL2	DDB2		TBC1D7		SLC35F3		ATL3
FOXD1	DAPK1		SPRED1		CSPG4		ATP8B3
POFUT1	EPHA4		VPS35		IFIT3		SRPX2
RGS10	MARCKSL1		TOR3A		ETS1		WNT3
IMPA1	UBTD2		IRF2BP1		ERMAP		ABCA1
CARMIL2	SMAGP		COQ2		FAT1		COL6A1
PDE3B	PKP3		MFAP3L		COL6A1		EML5
ING3	EFL1		ACSF2		SULF2		LETM2
MED11	AVPI1		SPRYD3		DUSP4		TSPAN18
MTO1	ZSWIM4		TREX1		SCRN2		BCL2
UBE2V2	SMAD5		ICAM3		FGF18		RAPGEFL1
MAPRE1	SDHD		CDPF1		CNTNAP3		PRRG4
MASTL	GSK3B		SH3KBP1		ANXA9		OPTN
MKNK1	ZNF383		CYFIP2		OR51B5		ZNF467
AP5S1	NR1D2		PAPSS1		IFI6		SULF2
ELOVL5	PITPNM2		PI4KA		MRC2		RAB26
GPRC5B	DOK4		GAN		CYSRT1		TNIK
CHD5	FKRP		ZNF490		CASTOR1		CUEDC1
POP5	CREBRF		NUDT3		ZNF467		FBLIM1
MAPK8IP1	HIP1R		RUFY3		PLAU		ENPP5
SLC25A19	ST6GAL1		EREG		MMP17		DUSP4
SLC3A2	FRMD5		BIN1		TRHDE		THSD4
FIBP	C16orf95		MMADHC		TNS3		CAPN12
SELENOF	STAT5B		PPARA		RALGPS1		PPARD
	CAPN1		GRHL2		PRSS23		BCAM
	MSRB2		SH3YL1		SOX9		RPS6KA1
	BID		PCDHGA10		SLC41A3		OR51B5
	OAT		ATP11A		GSN		PPFIBP1
	SAT2		FASTKD3		DGKQ		FAT1
	ERBB2		AMBRA1		NFATC2		OTUB2
	TEAD3		PSMB7		BCAM		ROR1
	ZMYND11		TMOD3		ABCA3		MRAP2
	SRD5A1		NLK		FBLN5		S100A2
	SLC45A4		RAB11FIP2		RBKS		ARSG
	FMC1		KRT19		OLFM1		SORBS1
	PTGFRN		HSD17B4		TRIM34		IL18
	PPP2R2C		C9orf16		SECTM1		INPP4B
	RAB3IP		MCCC1		IFIT1		TGM2
	DELE1		CBX2		SYT1		CIB2
	DENND1B		COP1		TSC22D3		OPLAH
	FBXL16		CDC23		OPLAH		DGKQ
	TBC1D13		FTO		FGFBP1		BCAR3
	UFC1		CDC25C		LRRN2		PAQR8
	MAP7		FAM199X		MRAP2		ALS2CL
	E2F3		TPM1		ARSJ		TINAGL1
	ARMCX3		DVL3		L1CAM		PTK6
	DCTN4		TVP23C		GDF15		FGFBP1
	ZNF460		L3MBTL3		GBP5		CAVIN3
	TRAPPC13		FKBP1A		SLC22A18AS		PLEKHB1
	ZNF668		RBM4B		FIBCD1		TRIM2
	MAP3K2		ZCCHC14		NOTUM		SEMA3A
	SRGAP1		RFX7		FBLIM1		CEP290
	AP2B1		KATNBL1		MAN1A1		HYAL3
	BRI3		ACAA1		ABLIM3		SYCE2
	SLC1A4		KDM8		FXYD3		RASGRF1
	SRI		ZNF384		PTK6		VSIR
	SERPINA1		CNOT9		TCN2		IGFBP6
	RBFOX2		AP1M2		KLHL30		MYO7A
	FAM120C		USP46		MACROD1		GLI2
	ELFN2		APEX2		IGFBP6		ZFYVE28
	TMEM51		TVP23B		PPFIBP1		DDX60
	ARFRP1		PFN2		VSIR		KCNC4
	RNF43		RILPL2		HSPG2		HIVEP3
	CACNA2D2		MDFI		ABCG1		FBLN5
	TICAM2		BBS1		KCNG3		APOBEC3C
	TRPV3		TXLNA		CLIC3		CALN1
	ING5		TOR2A		EPB41L4A		CASP4
	CSK		CAMKK2		CUEDC1		CPEB2
	FAM219B		E2F3		SERINC2		ABLIM3
	ACER2		RBPMS		CAVIN3		C1orf116
	PDIK1L		SFMBT1		TSPAN18		CELSR3
	TMLHE		TNRC6B		DTX3L		PDGFC
	FRMD8		ZNF629		ALOX5		CYP4F11
	PTPRG		EXPH5		ALS2CL		APOBEC3D
	CASTOR1		SPOPL		CASP4		SLC35F3
	UBFD1		MEMO1		TGM2		RHOB
	CMTM8		RTKN		RHOB		LYNX1
	INPP5J		KIRREL1		SEMA3A		TCN2
	ABCB10		MSRA		KLHL35		MELTF
	ZNF579		FZD7		ARL4C		LRMDA
	DST		ZNF692		FAR2		ALDH1A3
	BLCAP		ALMS1		F3		APOBEC3F
	TVP23C		PGM2L1		PDGFB		RBMS2
	EPB41		MSL3		SCUBE1		C19orf57
	ZFP36L1		GSN		BVES		MACROD1
	ARID5B		IQCK		APOBEC3C		APOD
	PYROXD1		ZNF711		C1orf116		SH3RF2
	STEAP2		SLC7A2		BST2		LIMS2
	CDK11A		HSD11B2		TIMP2		PRICKLE4
	NLGN2		HOXC10		KIAA0040		TNFRSF6B
	B4GAT1		UQCRC2		MELTF		CSPG5
	SOX13		NLRP4		SERPINA1		L1CAM
	ZBTB39		VASH1		BCAR3		SERINC2
	GLIPR1		TRIM52		INPP4B		PAPLN
	IVNS1ABP		IVNS1ABP		RUNX2		KIAA0040
	ADGRG5		COG8		TLR3		NOTUM
	SLC27A6		TAX1BP3		IFIT2		RTBDN
	ARHGAP32		NOTCH3		IL18		MAMDC2
	CIB2		PARP14		SH3RF2		MZF1
	IQSEC2		RNF141		RTBDN		SERPINA1
	MSL3		DGAT1		LIMS2		COL9A3
	LIMK1		ACBD5		ALDH1A3		HMGN5
	ARF3		TMEM165		ADGRF1		CASTOR1
	SLC25A40		ZKSCAN1		COL9A3		GALNT5
	TSC22D4		ACOT11		RAMP1		PDGFB
	RAVER2		ACYP1		TINAGL1		KRT13
	DCAF5		ABHD5		S100A5		LOXL4
	MYO6		FAM114A1		KRT13		TSC22D3
	PLEKHG6		AGO1		SKAP1		PRKAA2
	PTPN4		CSNK1G2		PRKAA2		ARL4C
	MED18		ARHGEF11		APOBEC3F		TLR1
	HGSNAT		IL27RA		GLI2		ITGBL1
	MAGI1		LMAN2		ARHGEF6		KLHL35
	FGD3		ZNF512		APOBEC3H		PACSIN1
	PLXNA1		ZHX1		LIF		ANO1
	PLEKHA8		MTG1		BTN3A3		LYSMD4
	SOCS2		LRRC8A		ANO1		MUC16
	REEP1		MIER1		LOXL4		BVES
	IL17RA		STX7		KRT15		TACSTD2
	UNC119		MCC		NT5DC4		RAET1E
	CYB5D2		UBASH3B		KLRC2		IDUA
	ZNF37A		ANKRD10		SYNE3		F3
	CDK19		ATN1		MUC16		MAML2
	NIPAL1		FARP1		KLRC3		ADGRF1
	ZNF800		CD151		EMP1		RPS6KA2
	FAHD2B		PHB2		ADAMTS14		EMP1
	SPATA17		LAMB3		ANK1		SLC22A18AS
	VPS13B		GABPB1		SEMA3B		RBKS
	NFKBIL1		PTEN		RASGRF1		SLC9A2
	ZNF519		IAH1		PRSS22		CNTN1
	TRRAP		DHRS7		TNFRSF6B		PCLO
	SLC35F3		MED8		MILR1		SCUBE1
	PI4KA		IKBKE		GGT1		PRSS22
	ZNF862		ZNF695		KLF2		KLRC2
	TOX2		ACAD8		GALNT5		SEMA3B
	IDH1		GABARAPL2		KRT32		FAR2
	SNPH		LHX6		KLK6		LATS1
	MATN2		TTC39B		MAML2		SYT11
	CAPN15		AK4		EHF		NRBP2
	MCF2L		TPST2		KLK10		CHRD
	MRVI1		IPP		BDNF		KRT15
	GNAL		FGF19		CALB2		KLF2
	FBLN1		MTA1		GFY		ANKRD26
	ARPIN		HNRNPCL1		TACSTD2		KLRC3
	PHLDA3		SIRT3		F10		PRF1
	SLC2A3		MAVS		CEMIP		KLK6
	TUBGCP4		NAT9		SLC15A1		CSF1
	DSC3		TRIM38		LGALS9		EHF
	BUB1B-PAK6		TBC1D20		HOXB4		RAMP1
	CEP170B		MRVI1		KLK7		GGT1
	GNPDA2		TGOLN2		VSNL1		GFY
	PIP4P2		NOD1		PRF1		S100A4
	ADCY7		EXOSC8		TSPAN1		CEMIP
	PTBP2		CNDP2		HOXB8		ADAMTS14
	ZDBF2		ATP11C		SLC6A20		KLK10
	CRYBG2		GPC3		SNTB1		BDNF
	C9orf129		STXBP4		SUSD2		VSNL1
	TRIM5		SLC37A1		KLK5		HOXB4
	PC		ACVR2B		APOBEC3G		HOXB8
	UGT8		CHMP4B		SPARC		KLK5
	MCCC2		G6PD				LIF
	MAP3K9		ZFYVE21				F10
	PAFAH2		ARF3				MAP4K5
	CEP85L		ADGRA2				SNTB1
	GATAD1		CERK				APOBEC3G
	PHKB		TMEM170A				KLK7
	RHOBTB2		ZNF138				CALB2
	SMARCD3		SERP1				TSPAN1
	LZTS2		GAD1				SUSD2
	CMTR2		GFOD2
	JOSD2		TBRG1
	ACSF2		PARD6G
	ADAT1		FAM174A
	TSPAN17		TMEM14B
	ZC3HAV1L		ARMCX6
	ATP11C		ANKRD16
	ZBTB46		TVP23C-CDRT4
	RP9		NPDC1
	PGS1		ZNF107
	CRACR2A		RFLNB
	ZNF765-ZNF761		ARL8A
	FAHD2A		VPS26B
	ZBTB1		MINPP1
	VPS41		BCL2L1
	PTPN1		VPS26C
	HIVEP1		BTBD10
	ZBED6		CENPT
	SLC35D1		ZFYVE28
	NLRX1		PACS2
	FAM83H		ETV1
	SH3RF2		RASSF5
	MEX3C		GLCE
	UBQLN2		CASP6
	GABPB1		BMP4
	TPGS2		ZNF503
	M1AP		ANXA4
	DECR2		CST3
	RIC8A		C1GALT1C1
	JADE2		PLEKHG3
	RBM14		ATP6V0A2
	ABHD17C		DCAF5
	ZNF440		FXYD1
	MTMR4		BCL9
	TFDP2		PLD2
	TMEM120A		PTTG1IP
	GALNT7		AMOTL2
	EXOC6B		ABHD17B
	LAMTOR3		SCMH1
	CDC25C		ANKRD18A
	MDFI		TEAD3
	ZNF517		ZMIZ2
	VSIR		OXR1
	RHBDF1		HDHD3
	GPRC5A		ARPP19
	PI4KB		G3BP1
	ASCC3		TTC14
	ZNF28		PLEKHG6
	SEC24D		IFT172
	WDR72		GNG10
	SS18L1		CLN6
	RGS2		COMMD9
	MAST4		ADCK2
	MTX3		ECHS1
	ZFPM1		BAZ2B
	ASTN2		GPX1
	AKT1		PHKA2
	GLB1L2		ARHGAP35
	CARD10		HAGHL
	XKR8		DNAJC25-GNG10
	TMBIM1		SUV39H1
	SLC35C1		TEX9
	HECTD4		BDH1
	ZNF799		ANKEF1
	CRTC3		MEX3C
	HSD17B1		INPP1
	FUT2		DDIT4L
	PLSCR1		CDH3
	HSD11B2		OSGEP
	AGO2		TSC2
	DGCR6L		MEF2C
	KDM4B		TMEM184A
	TSPAN18		PEAK1
	ZNF672		RUFY2
	PSME1		HPS4
	ARHGAP35		DGCR6
	KANSL1		ZNF799
	PTTG1IP		DMAC1
	KDM6A		ARMCX5
	ARF6		RPAIN
	PXYLP1		KIAA1958
	BNIP2		IDH1
	ATP1A3		COMMD5
	VPS36		FAM3A
	RASA1		STAU1
	FIG4		PIN4
	ALMS1		VPS33A
	TLNRD1		VPS28
	YAF2		PPP3CA
	KHDC1		PLCB3
	GNAZ		SPEN
	TET2		FXYD3
	HS6ST1		TNKS
	GPR180		FAM133B
	OFD1		EIF6
	KCNQ2		ZNF410
	VWA1		RPL13
	DMPK		CEP78
	ARMC5		ATRX
	FBXW8		GNPNAT1
	RALY		TMBIM1
	CTSZ		C12orf66
	RFX7		NUB1
	ZNF106		SMCR8
	STK11IP		NCBP2
	DYNC1H1		CRACR2A
	OVOL1		ADAM10
	TRIM13		MARK2
	MAP3K1		KNOP1
	KANK2		DCUN1D2
	TEAD1		ZNF544
	RHBDD2		MAT2B
	LLGL2		ADNP
	MAN2B2		CYTH2
	WDR35		ZCRB1
	DBN1		ACTN1
	LPGAT1		DIDO1
	ZNF276		KREMEN1
	SOCS3		SUCO
	CHD1L		ASCC3
	PDE5A		CKAP4
	ACTN1		ALG10B
	CBX2		IFNAR2
	MCFD2		USP31
	TBL1X		ZNF664
	TECPR1		TIMP2
	HADH		MDK
	PNISR		VPS37A
	DLG3		WDR70
	ZNF197		UTP14C
	ANKRD44		ZNF35
	HES6		PIAS3
	KDM6B		SETD1B
	STXBP4		BCAS3
	OSBPL3		ANKRD11
	PCGF3		CD2BP2
	FGFR2		SLFN5
	KHNYN		CMTM4
	ECHDC3		TULP4
	PPIP5K1		PHF6
	ZBTB45		NFIX
	WWP1		NQO1
	ZNF780B		TSTD1
	ROR2		FNBP4
	SNX9		MVK
	VAMP1		RCN1
	ZCCHC3		CELF1
	SMARCD1		TIGD5
	IBA57		WDR35
	GAN		CPOX
	SHPK		UNC50
	PPAN-P2RY11		PIR
	MGAT5		TAF4
	ATN1		NEMF
	NEDD4L		CNKSR1
	PITX2		DOCK9
	ZNF407		CNKSR3
	SECTM1		CSK
	CEP89		SPR
	PARP6		CCDC6
	MAP3K6		SOD1
	C6orf52		PRAF2
	PHF21A		ANKRD40
	ACOT7		RNF14
	TRAK1		ZNF286A
	ZNF660-ZNF197		MED28
	RAD54L2		GNPAT
	AGO3		METTL9
	ITGAV		DSC3
	RAB11FIP2		DENND6B
	ZBTB43		GPX4
	PXMP4		NDUFS5
	AKAP9		DGKQ
	DGKG		POLN
	RAB22A		TEX261
	WDR7		GALNT2
	NAT8L		NDUFS4
	MYLK		MOV10
	ZFHX3		PDLIM1
	CD99L2		ECHDC3
	IFT74		MBD1
	ATF7IP		TIAM1
	ELFN1		ELMOD2
	TBC1D17		ACP2
	ERI2		NPM3
	PTPN9		FBXW5
	ADCY9		PTBP2
	AMBRA1		LSS
	HERC2		ANKFY1
	MCTP2		ITGB5
	RPAP2		NGDN
	KDM7A		UBE2D1
	MGRN1		SSBP3
	INVS		S100A11
	SLC7A2		GPBP1L1
	SHC1		DHPS
	SMARCAD1		PTPN9
	LYPD1		TMBIM4
	CASTOR2		TRIM65
	LRRC6		PCDHAC2
	C15orf40		ZNF460
	EXOC4		HEMK1
	RND3		ETFA
	TXNDC9		ABL1
	HIC2		SRD5A1
	C9orf85		UFM1
	PDRG1		EPHB4
	ZNF138		DBI
	LPIN3		PDAP1
	GIGYF2		ADORA2B
	SDC3		MYL12B
	RGS12		WTIP
	LATS1		NFYA
	TNRC6B		SLC25A38
	PCNX2		C2CD3
	HEBP1		ARID5B
	ANKRD50		IQSEC2
	AGGF1		CDR2L
	DUOX1		BTBD1
	UQCRC2		RFC1
	APPL2		RRAS2
	GALNT2		UBE2Q2
	PRRG2		TRAPPC9
	ZNF761		CRTC1
	DISP1		UTP14A
	C12orf4		CFAP97
	FAM156A		LEMD2
	MPG		NFKBIL1
	RABL2A		BAIAP2
	USF1		CPSF7
	ANKRD16		HINT1
	BIN1		CYB561
	CD276		MOAP1
	ZNF576		AKIP1
	PNPLA4		TGIF1
	SLC27A1		KLHL36
	TUBB3		RAD54L2
	MAP3K11		NISCH
	BDH1		SOCS5
	FHOD3		PPM1L
	MFSD6		MAP3K1
	FAM214B		TMEM263
	RAB5B		COBL
	MYO7A		PSMB1
	ZNF558		SERPINB8
	UBR3		ZNF133
	CHMP4B		PDHX
	CCDC93		CBWD2
	COX19		GFI1
	NF1		MTFMT
	TBCK		KLHDC3
	SMIM19		PWWP2A
	DGAT1		CMAS
	FBXO4		TFEB
	ARL2BP		LSM14B
	SPTAN1		YTHDC2
	DCAKD		MTMR12
	ST14		TMEM102
	SP140L		URM1
	ZNF266		SCFD2
	ETHE1		PPP2R5A
	CDC25A		RASSF7
	SYNGAP1		FBXO11
	CBWD5		POLB
	RNF208		EEF1AKMT2
	BIRC6		SNX8
	FAR1		OSBPL2
	SKP2		SHC1
	NUDT14		KANSL3
	TWSG1		PRRC2B
	C11orf49		ENDOG
	TGOLN2		ZBTB1
	AP1M2		RBAK-RBAKDN
	ATP6V0A2		TUBB3
	IRF1		STAU2
	AKAP6		NAGPA
	SNX11		RAD50
	ZNF319		MYL12A
	TFAP2C		SRCAP
	NAV1		HNRNPLL
	E2F6		PLA2G10
	ABCC10		CLOCK
	ACVR2B		ZNF354A
	UPF1		ACADS
	PRKACA		MYO5A
	KIF2A		MFAP2
	BBC3		PAPOLG
	KIAA1671		PYM1
	HS6ST2		IDH3G
	TOR4A		TMX3
	FDXR		TLN1
	C12orf66		CNOT7
	GBX2		ELP6
	DOCK9		LGALS3BP
	MAP4K4		PTPMT1
	ZCCHC24		XPNPEP1
	TMEM131		C15orf40
	INTS6L		C12orf45
	EPG5		SMIM19
	AGRN		PARP9
	SPECC1L		MR1
	UBE2J1		EHD1
	BDH2		MSANTD4
	TNFAIP3		TMEM209
	RUFY2		AMZ2
	PHF11		RBFOX2
	LANCL1		GNPDA2
	HERC1		MEX3D
	LYPLA2		SPECC1L
	SPR		LYPLAL1
	IKBKG		OSTF1
	SERPINB8		DCTD
	ARHGEF11		RPL24
	TIMP2		YWHAB
	FGD4		UFC1
	ATP6V0E2		ALDH7A1
	PRR36		NIPSNAP2
	CLIP4		DFFB
	PSKH1		IER5
	CHRNA7		UVRAG
	SLC6A6		G6PC3
	PRR12		ZNF672
	ALDH6A1		RALGAPA2
	BMPR1A		BMPR1A
	GSN		RASSF1
	ZNF226		GSTP1
	KIAA0556		AK3
	POFUT2		ARMC7
	SNX19		GCDH
	FBXO9		SPG21
	TLN1		PDF
	METRNL		ADGRB1
	RNF141		SLC17A9
	DEF8		AKNA
	NPHP3		SLC37A2
	RASSF8		ZC3H3
	EFNA3		DDB2
	PATZ1		GLB1L2
	DCBLD1		MAGED1
	CCNE2		GBA2
	RASSF3		RWDD4
	PLCG1		SLC35D1
	GNAQ		NRBP1
	UBASH3B		CCNE1
	SMYD5		DCLRE1C
	ANKFY1		ZNF24
	ARHGEF35		KHDRBS1
	KBTBD4		LUZP1
	MED28		C14orf119
	COP1		REEP5
	DTD1		IRF3
	CAMKK1		ZBTB9
	MAP3K3		GAMT
	BACH1		ASAH1
	RAPGEF2		PICK1
	PPAN		TPGS2
	VPS35		NHP2
	PLA2G15		LDLRAD3
	ZSWIM8		GSTO2
	SNAP23		PTPRJ
	NLRP11		RBBP7
	GTF2I		LZIC
	LSS		DMXL1
	EPHA10		ZC3H4
	FRMD6		POLR2D
	GPALPP1		OXCT1
	ZNF587		COMMD3
	ASS1		BACH1
	ZNF711		IGSF3
	ADAM22		PDCD2
	EPC2		MIB1
	THRA		SCP2
	RFX1		ZNF175
	HS2ST1		ENTPD4
	SIMC1		ARL15
	TFAP2E		EDF1
	CASP6		PTPN3
	STEAP3		CAPN1
	BOD1		ARL14EP
	NMB		SYPL1
	PYROXD2		ENGASE
	PPP1R12B		C12orf4
	TLK2		NDUFS6
	B3GNTL1		ATP6V0A1
	TANC1		HIPK3
	CCDC57		PLXNA1
	YTHDF3		RNF216
	RAD54L		TBC1D9
	AVL9		HMGXB4
	PDHX		CEP162
	QSOX1		CORO1B
	KANSL3		NDUFB6
	ZNF600		NUCB1
	CACNA1H		TRAPPC2B
	CCDC136		ZNF177
	WEE1		BRD4
	MICALL2		VPS35L
	CRACR2B		ENSA
	NPEPPS		ANKRD50
	IRF2BP1		NHSL1
	RASSF5		SERF1A
	ZNF532		SERF1B
	MBNL2		ZBTB8A
	ATMIN		MRE11
	USP43		DHX29
	METTL9		EXOC4
	DHRS4L2		PPP2R3A
	CBWD6		SEC14L2
	CTR9		KIF2A
	CLIP1		BRCC3
	G6PD		AEN
	ANKS6		ARFGAP3
	CEP78		ALYREF
	CDK20		ZC3H11A
	PHKA2		GOSR2
	PRRT1		RNF19B
	NIN		ACAP3
	VPS26C		RUBCN
	USP5		ERBB2
	DYNC2LI1		MFSD14C
	ZNF821		ZBTB7B
	ARL5B		INPP5F
	MSH3		PRKCA
	ZMYM4		PLCG1
	PANK2		EEFSEC
	SLC20A1		DOCK7
	LRP8		EEF1E1
	TNFRSF10B		S100A2
	KBTBD11		COA3
	ZSWIM7		DPM2
	DHRS4		VPS72
	RYBP		MRPL24
	COQ4		ROR2
	SGCE		NOS1AP
	MTHFD2L		GRHPR
	SESN2		COMMD4
	SH3BGRL		GSS
	ROGDI		FLOT2
	TRAPPC9		SLC39A9
	KHDRBS3		VPS33B
	KIF5A		ANKRD13B
	RNASEH1		RBBP9
	MON1B		TGFB1
	OXCT1		ADCY7
	BLVRA		ANKRD52
	VSNL1		KAT6B
	HLCS		TGDS
	DDI2		DCTN2
	KMT2B		PSME2
	TGFBRAP1		MGAT5
	NRBP1		MTMR4
	ADNP		LIN9
	NBPF12		CCDC34
	WNK2		YTHDF3
	CNN2		TGFBR2
	TADA1		SLC35F3
	ALDH7A1		NFKBIE
	PPARA		PDE9A
	PDLIM1		FAM204A
	GMIP		USP5
	ALS2		ZNF800
	HMBOX1		GABPA
	WRN		WDR45B
	KMT5C		KCNK1
	EEPD1		KIAA1324L
	CC2D1A		STRBP
	TMED7-TICAM2		PITHD1
	ARHGEF16		SNX13
	IGSF9		SLC12A8
	TADA2B		RNF146
	MBLAC2		BNIP2
	AKIP1		HELZ2
	ZNF778		PTCD2
	C7orf26		TUBGCP4
	CRISPLD2		SEC14L4
	COQ6		PHF2
	KCNK5		PDXDC1
	CELSR2		AP5Z1
	TMEM170A		UBE2D3
	CCSER2		ASNSD1
	FMNL1		DGCR6L
	DGKQ		SHROOM2
	C12orf45		GTF2H5
	STK40		ATP11B
	USH1C		ANAPC11
	ZNF814		ZNF227
	CIC		KLHL2
	TRAF4		INSIG1
	PPP3CA		TANC1
	KCTD2		TJAP1
	ARMCX6		RTF1
	ARID3B		ZNF551
	RNFT2		DGLUCY
	STK38		FAAP24
			KIF21A
			ZMYM4
			ITGB3BP
			ERCC8
			ARL2BP
			RPA3
			PCF11
			PNISR
			NEK6
			TPPP
			HEATR5B
			ODR4
			SRI
			SFXN2
			UPF3A
			RBL1
			HINT3
			ARHGEF35
			FAM193B
			ZDHHC3
			MED10
			MTFR1
			GSTO1
			ZBED5
			RTCA
			DPM3
			UNC119
			ABHD13
			ASS1
			DCXR
			BCL7B
			ADGRL1
			ARHGEF19
			GRINA
			SART3
			ATPAF2
			ARHGAP32
			TTC38
			ARPC3
			UBQLN2
			STAT1
			PBX2
			CFDP1
			CNN2
			STRIP2
			BLVRA
			CEP89
			GNAL
			NONO
			OTUB1
			APEX1
			SPATA2L
			YTHDF2
			AP3M2
			PCNX4
			TDG
			TMEM98
			LIN7C
			TMEM131
			AZIN1
			GM2A
			ITGAV
			MRM2
			CDK2AP1
			EIF1B
			CDC42EP1
			CES3
			CYP4V2
			GNG5
			CELSR1
			ZNF436
			AP1B1
			AP4M1
			SDCBP
			ATF7IP
			EXOSC7
			SLC37A3
			UROS
			TMEM70
			SDC4
			GNA12
			DYNLL2
			PIGG
			SLC25A26
			PKN1
			HEXA
[truncated: 191 more rows]

## Sheet: Table S6
Table S6. DEGs in both TOP3B-KO and Y336F-KI.
RNA-seq		Ribo-seq
down (127)	up (177)	down (70)	up (146)
SPNS3	PDGFC	ANXA10	TIAM1
CD33	ANK1	ICAM1	GGT1
KRT6A	KLRC2	PRDM1	RASGRF1
ACSL5	KLRC3	ZNF426	IGF2
HAS3	ADGRF1	CD33	ADGRA2
ICAM1	BDNF	KLF4	MSI1
SGPP2	SLC15A1	CPM	CADM4
NR2F2	SLC2A3	TTN	PDE4B
OSR1	CYP24A1	TRPM6	E2F7
SYTL3	SUSD2	KRT6A	PPM1F
PAOX	SLC6A20	HAS3	INPP1
PHOSPHO1	LGALS9	PAG1	STK11
ZHX2	JAG1	GREB1L	PARP16
TIMP3	SELENOP	ARL4A	PI4KA
WDR25	ARHGAP18	CCDC122	PLEKHB1
RAB3IL1	TSPAN1	AGPAT4	AMOTL2
NPNT	BCKDHA	ANGPTL4	FAT1
ETS1	APOBEC3G	NT5E	PCNX2
CHKA	RASGRF1	CD55	TP73
FLNC	RHOBTB3	TIGD1	DRAXIN
GXYLT2	MAP4K5	TANGO6	MOSMO
TMEM158	KIAA0040	STEAP1B	MAP4K5
SLC43A1	TNNC1	WSB2	OPLAH
RASD2	CTSH	NPNT	FGF19
MYBL2	PLA2G7	PTPDC1	ACOT7
GPR3	GGT1	CD68	KIAA0040
KLF4	CEMIP	VCAN	GBA2
AKR1C3	PLPPR4	MGLL	USP46
SLC48A1	MAN1A1	ZHX2	RHOBTB3
ALOXE3	TEX9	ARHGAP40	DNAJB2
AFAP1L1	FAR2	AFAP1L1	TTC38
PNMA1	SYT1	SAMD9	SOGA1
PWP2	APOBEC3H	STEAP1	SLC25A29
SULT2B1	TNIK	JUNB	NR2F1
BLMH	MKX	GRHL1	GNB1
IL17RC	DENND5B	LAMC1	FAAH2
IL20RA	MBNL2	ERRFI1	TMEM132A
ARHGAP26	ANTXR1	CHD8	H6PD
MTSS1	L3MBTL3	C6orf120	SGSH
ARL4A	PARD3	STK17B	ETS2
PDE2A	JAK1	RNF125	FAHD2A
WSB2	VPS36	SPDL1	G6PD
MYO15B	LIF	ARHGAP26	NR2C2
STARD8	SH3D19	MOSPD1	CORO1A
CFD	GNAZ	CCDC28B	TMEM263
CCNF	KLHL24	ACSL5	AXIN2
WLS	S100A5	COL4A5	TNIK
SLC45A1	ZNF33B	CENPE	TMEM165
PANX2	CASP4	MYO15B	PSME1
STPG1	SULF2	SYNJ1	NUAK1
ESRP2	STK26	ZNF350	CD82
KRT6B	PDE4B	FGF2	NUCB1
DNMT3B	PPM1H	WNT16	CD83
CCDC103	LYRM1	GSTCD	TMEM198
TMEM38A	TOX2	CSTF3	CHPF
BCL11A	KLF2	SLC30A4	C3orf18
AOC2	SGCE	TNKS2	NTSR1
SPC24	SLC44A5	SLC4A7	SYT1
ABCA7	DUSP6	CIP2A	ZSCAN2
TSPAN14	PLEKHB1	NADK	MAP3K3
TLE1	EPS8	LAMA3	LRRN2
PRADC1	ZNF596	PDE2A	ENO2
RAP1GAP2	PPFIBP1	SRBD1	MACROD1
UPP1	AK9	BLMH	CHRAC1
DENND3	GSDME	LARP1B	LATS1
LPCAT3	LIMCH1	HAUS6	CNPPD1
ACAD11	TCEANC	TMCC1	MKNK2
DMAP1	PPP3CA	SGO2	SMTN
GALNT14	SLX4IP	FGFR1	BCL2L1
BAMBI	NT5DC4	ACAD11	ANKRD26
PCK2	SMARCD3		ETV6
TBL3	SPACA9		TNFRSF21
CCDC28B	PARVA		TMEM159
PLD6	TNS3		DUSP6
GOLGA7B	CA11		PDGFC
PLCD1	ANKRD28		C16orf95
OASL	TRIM5		ANK1
HSD3B7	ABI2		MAN1A1
SMPDL3A	NR2F1		PPM1H
IQCD	CASD1		FRMD5
AGPAT4	ALDH5A1		COL6A1
PSRC1	ZNF704		NCAPD2
SLC27A3	CREBRF		CDK18
HEXIM2	ACYP2		BRI3
TMEM249	UGT8		APBB3
PFAS	GLI2		TTC37
SEPHS2	IL18		TSTD1
PPP1R26	SLC41A3		PPFIBP1
ITPRIP	PAPSS1		FAM199X
MAN2B1	SH3BGRL		DENND5B
CENPA	TRIM44		DET1
IFI35	VAMP4		BCKDHA
CYSTM1	ARNT2		USP24
TOMM40L	OXA1L		SCRN2
ST3GAL1	ADAM22		IRF2BPL
PLEKHN1	ATP1B1		FBXL19
CTC1	LIPT2		ETV1
SLCO4A1	GALNT12		COL9A3
PHF7	PARP16		GSN
NADK	WEE1		PAPSS1
NBPF1	TMEM143		TNRC18
AP5S1	MACO1		TGOLN2
QTRT1	FAM210B		PTMS
LONP1	ARID5B		CITED4
HK2	AIG1		CST3
ADORA2A	TRIM2		KCTD3
WDR77	FBXL2		OSBPL7
NDRG1	DCAKD		ALDH1A3
PEX6	PRSS23		SPARC
CKMT1A	DRAXIN		CEP290
FBF1	ZNF85		GDF15
PRSS3	NIPSNAP3A		CYB5B
MFSD3	CYFIP2		ARHGAP18
ANGPTL4	FRMD5		JAG1
KCTD12	ACAA2		APOBEC3C
ZNF513	ZNF100		ARHGEF9
GPER1	IFT74		MAGED2
TRAPPC4	TRAPPC2		FBXO2
CD68	RAB40B		MELTF
RGS16	ALDH1A3		CA11
CTRL	FGF18		BCAM
STAC3	DDX58		MDK
ANXA10	ANKLE2		EHF
SATB2	CDK14		PEG10
TRIML2	SLC1A4		COASY
CKMT1B	PTPRE		APOBEC3G
MGLL	PDE9A		CTSH
	EPB41		SEMA6B
	ALG10		BDNF
	LDLRAP1		CYP24A1
	CMTM8		SELENOP
	HS2ST1		CEMIP
	APOBEC3F		CASP4
	APOBEC3C		SEMA3B
	ZFHX2		KLK10
	HS6ST2		CBFA2T3
	TRIM38		INPP4B
	HPF1		F10
	CPNE2		SNCG
	CYP2U1		IFITM1
	NDRG4		TNNC1
	FHOD3		S100A4
	MCCC2		KLRC2
	TMLHE		KLRC3
	IFITM2		ADGRF1
	MFSD6		SLC15A1
	ALDH7A1
	ABR
	DUSP22
	APP
	C20orf96
	SPTLC2
	NUB1
	PLEKHH1
	PRRT1
	SHOX2
	MEX3A
	ANXA4
	MEX3C
	TPGS2
	TRAPPC13
	SMIM20
	ADAMTS14
	SRD5A1
	CD24
	PLPP5
	SMIM19
	KIF5A
	RBM4B
	LYPLAL1
	PTTG1IP
	METTL9
	PHKA2
	SIMC1
	ETS2
	ERV3-1-ZNF117
	ABRACL

## Sheet: Table S7
Table S7. The percentages of overlapping DEGs between different mutants.
	TOP3B-KO	Y336F-KI	overlapping DEGs / percentage to TOP3B-KO	random genes / percentage to TOP3B-KO
RNA	up	up	0.498599	0.173669
RNA	down	down	0.241055	0.103578
RPF	up	up	0.506849	0.174658
RPF	down	down	0.268199	0.0957854
	TOP3B-KO	Y336F-KI	overlapping DEGs / percentage to TOP3B-KO	random genes / percentage to TOP3B-KO
RNA	up	down	0.0448179	0.103641
RNA	down	up	0.107345	0.188324
RPF	up	down	0.0787671	0.0958904
RPF	down	up	0.10728	0.164751
	TOP3B-KO	TDRD3-KO	overlapping DEGs / percentage to TOP3B-KO	random genes / percentage to TOP3B-KO
RNA	up	up	0.408964	0.114846
RNA	down	down	0.284369	0.0922787
RPF	up	up	0.489726	0.106164
RPF	down	down	0.371648	0.0996169
	TOP3B-KO	TDRD3-KO	overlapping DEGs / percentage to TOP3B-KO	random genes / percentage to TOP3B-KO
RNA	up	down	0.0308123	0.114846
RNA	down	up	0.0546139	0.120527
RPF	up	down	0.0273973	0.0924658
RPF	down	up	0.0421456	0.130268
	TOP3B-KO	FMR1-KO	overlapping DEGs / percentage to TOP3B-KO	random genes / percentage to TOP3B-KO
RNA	up	up	0.142857	0.0448179
RNA	down	down	0.112994	0.0282486
RPF	up	up	0.130137	0.0479452
RPF	down	down	0.145594	0.0651341
	TOP3B-KO	FMR1-KO	overlapping DEGs / percentage to TOP3B-KO	random genes / percentage to TOP3B-KO
RNA	up	down	0.0308123	0.0420168
RNA	down	up	0.039548	0.0320151
RPF	up	down	0.0445205	0.0410959
RPF	down	up	0.0498084	0.0536398
	FMR1-KO	TOP3B-KO	overlapping DEGs / percentage to FMR1-KO	random genes / percentage to FMR1-KO
RNA	up	up	0.119438	0.0210773
RNA	down	down	0.136986	0.043379
RPF	up	up	0.0606061	0.0191388
RPF	down	down	0.0571429	0.0135338
	FMR1-KO	TOP3B-KO	overlapping DEGs / percentage to FMR1-KO	random genes / percentage to FMR1-KO
RNA	up	down	0.0491803	0.0351288
RNA	down	up	0.0251142	0.0251142
RPF	up	down	0.0207337	0.0207337
RPF	down	up	0.0195489	0.0225564
	FMR1-KO	TDRD3-KO	overlapping DEGs / percentage to FMR1-KO	random genes / percentage to FMR1-KO
RNA	up	up	0.395785	0.119438
RNA	down	down	0.255708	0.0776256
RPF	up	up	0.347687	0.127592
RPF	down	down	0.206015	0.105263
	FMR1-KO	TDRD3-KO	overlapping DEGs / percentage to FMR1-KO	random genes / percentage to FMR1-KO
RNA	up	down	0.0983607	0.117096
RNA	down	up	0.0958904	0.13242
RPF	up	down	0.0510367	0.0877193
RPF	down	up	0.0661654	0.147368
	FMR1-KO	Y336F-KI	overlapping DEGs / percentage to FMR1-KO	random genes / percentage to FMR1-KO
RNA	up	up	0.421546	0.18267
RNA	down	down	0.335616	0.130137
RPF	up	up	0.30941	0.191388
RPF	down	down	0.172932	0.102256
	FMR1-KO	Y336F-KI	overlapping DEGs / percentage to FMR1-KO	random genes / percentage to FMR1-KO
RNA	up	down	0.168618	0.107728
RNA	down	up	0.178082	0.191781
RPF	up	down	0.124402	0.0861244
RPF	down	up	0.169925	0.174436

## Sheet: Table S8
Table S8. DEGs in both TOP3B-KO and TDRD3-KO.
RNA-seq (296)		Ribo-seq (240)
Down (150)	Up (146)	Down (97)	Up (143)
SPNS3	PTTG1IP	ANXA10	PTMS
CD33	TRAPPC2	MFSD14A	AKT2
KRT6A	SPACA9	WWC2	FAM199X
ACSL5	S100A5	ZNF426	TMEM132A
SMAD7	PDE6D	CD33	GNB1
HAS3	SEMA4G	KLF4	FAM43A
RHOU	CMTM7	SMPDL3A	PAPSS1
CDIP1	TPGS2	PPARG	SLC1A1
ICAM1	C1RL	TTN	TMEM165
DUSP9	TOX2	KRT6A	CYP4F3
PPARG	IDH3G	HAS3	MAGED2
SGPP2	FOLR1	ANGPT2	TSTD1
NR2F2	AXL	GREB1L	PPM1F
OSR1	DCAKD	ARL4A	PI4KA
SYTL3	TRIM44	CHPT1	EPN1
AREG	VPS36	AGPAT4	SGSH
MYZAP	RCN1	CD55	RHOBTB3
GRHL1	EPB41	TIGD1	CRABP2
ZHX2	RNF130	SMAD7	MDK
ZNF324	OXA1L	ANKIB1	EHBP1L1
WDR25	PTPRA	TANGO6	LRP10
NPNT	ABR	PIR	TMEM104
CHKA	ALG10	MSX2	PRSS8
AGRN	ZNF467	IRX4	SIRPA
FLNC	STK39	WSB2	GNAS
GXYLT2	IL18	SLC7A2	E2F1
TMEM158	IFITM2	PER1	AMOTL2
RASD2	TRIM5	TIMM17B	NUCB1
MYBL2	GALNT12	AGRN	CD82
ABHD6	NETO2	VCAN	SMTN
STRIP2	PARVA	TMEM107	PCYOX1L
KLF4	APP	CCDC14	NT5DC2
HMOX1	PDE4B	ZHX2	NTSR1
PER1	CD44	SBF1	ADGRA2
ATF3	RBMS2	PRR12	PDE4B
PIR	SLC1A4	MAP3K4	SIPA1L1
WNK2	SLC35D2	STK10	DENND5B
KIAA0100	APOBEC3F	SYN2	CNPPD1
PNMA1	NIPSNAP3A	TRIML2	COL6A2
PWP2	PPM1H	FBXL18	TRAPPC12
NAGS	ABI2	IFIH1	GPM6A
SULT2B1	APOBEC3C	GRHL1	E2F7
BLMH	RRAGD	NR2F2	MALL
IL20RA	AIG1	IP6K1	SEMA6B
ARHGAP26	HPCAL4	SMC3	DUSP6
ARL4A	OR51B5	LIN9	TRIOBP
PDE2A	USE1	ECSIT	FBXL19
WSB2	SMARCD3	OASL	NCAPD2
FAM193B	LDLRAP1	ZNF845	ETV6
EML1	CKLF-CMTM1	CHD8	EGFR
WLS	ANKLE2	AP3S1	IRF2BPL
SBF1	FBXL2	HMOX1	CST3
STPG1	ACOX2	RHOU	CD44
TIMM17B	PTPRE	PCF11	CBFA2T3
KRT6B	ANKRD28	AQR	CYB5B
DNMT3B	CPNE2	STK17B	USP24
DAPK3	ADGRA2	RNF125	ARF5
HSPB8	EPS8	SPDL1	CHPF
TXNRD2	COL12A1	ARHGAP26	ARHGAP18
GRHL3	ASIC1	SERINC5	CTSH
MBD6	ATP1B1	MOSPD1	WWTR1
SYMPK	TMEM165	ACSL5	TIAM1
BCL11A	LHPP	FGF2	VPS36
HOXA11	ALDH5A1	WNT16	BCKDHA
ADAT3	TNFRSF6B	ELOA	C16orf95
ANTXR2	DUSP22	CCDC138	B9D1
IRS1	TCN2	FN1	BRI3
CCDC88C	LYRM1	CSTF3	NR2C2
SLCO3A1	ENDOD1	ZNF267	GLIS2
TSPAN14	FHOD3	TNKS2	GRIN1
FGGY	ALDH1A3	SLC4A7	KCTD3
ZBTB17	PPFIBP1	YLPM1	MOSMO
RRP8	TMEM143	CIP2A	NOS3
SLC25A44	SRPX	KBTBD8	JAG1
SSBP4	CASP4	GPR3	ACOX2
CRAT	TRIM38	WNK1	PSME1
PPP1R35	JAK1	RPP30	TMEM25
GTF3C5	PLAU	KDM5B	TTC37
LPCAT3	RTBDN	TRIM6	COL12A1
ACAD11	PARP16	RAB9A	AXIN2
GFOD1	TNS3	TET2	COL18A1
DMAP1	SLC6A20	BLMH	ENO2
GALNT14	TRIM2	GRIPAP1	SCRN2
STYXL1	STK26	ATF7IP2	GSN
BAMBI	PARD3	AREG	FBXO2
IRX4	ITGAE	ANKRD13A	SYT1
CCDC28B	SLC41A3	HMGA2	DNAJB2
PLD6	CAMK4	PFAS	COASY
NLE1	ADPRHL1	TMCC1	CACNA2D2
TBX3	FN3K	SGO2	HTR1D
HSD3B7	CA11	KIAA0100	KRT32
PIM2	SMIM20	FGFR1	MAN1A1
SMPDL3A	RAB40B	DOK1	BCORL1
AGPAT4	F8	ID2	H6PD
COPS7B	LIPT2	ACAD11	CYP24A1
ELOA	SRD5A1	RBBP6	STK39
CDK5RAP1	FGF18	TBCC	ATP8B3
SUPT5H	CMTM8		ABCA1
ECSIT	TLR3		COL6A1
ATAD3B	SULF2		RAB26
SEPHS2	CYP2U1		TNIK
CENPA	OR51B4		BCAM
WDR59	KIAA0040		PPFIBP1
HIRA	SH3D19		FAT1
PKIB	MAP4K5		INPP4B
MARVELD3	PRSS23		OPLAH
CYSTM1	GNAZ		PLEKHB1
ST3GAL1	ZNF704		CEP290
HILPDA	CTSH		RASGRF1
EDC4	KLF2		KCNC4
PRR5-ARHGAP8	LIF		APOBEC3C
AKAP8L	APOBEC3H		CASP4
NADK	GGT1		CELSR3
IMPA2	ADAMTS14		PDGFC
QTRT1	SYT1		MELTF
TBCC	FAR2		ALDH1A3
TAF6	ANO1		MACROD1
MLLT6	SLC15A1		TNFRSF6B
HK2	BTN3A3		L1CAM
FBXW9	PDE11A		KIAA0040
GRHL2	ANTXR1		RTBDN
GPRC5C	TNIK		COL9A3
ZC3HC1	PLEKHB1		ANO1
ADORA2A	JAG1		ADGRF1
CHPT1	DUSP6		KLRC2
DUS2	ARHGEF6		SEMA3B
DDX28	MAN1A1		LATS1
CKMT1A	MAMDC2		CHRD
PSMC5	GFY		KLF2
OVOL1	NT5DC4		ANKRD26
FBF1	CEMIP		KLRC3
EXOSC6	ADGRF1		EHF
SLC9A1	TCEA3		RAMP1
MAML1	GLI2		GGT1
EIF2B5	GSDME		GFY
ANGPTL4	APOBEC3G		S100A4
VASP	RASGRF1		CEMIP
YJU2	TSPAN1		KLK10
TRAPPC4	LGALS9		BDNF
PTDSS1	PDGFC		F10
RGS16	BDNF		MAP4K5
SYCP3	SLC2A3		APOBEC3G
PLEKHA6	ANK1		SUSD2
TACO1	SUSD2
CTRL	KLRC3
ZNF581	KLRC2
ANXA10
SATB2
TRIML2
CKMT1B

## Sheet: Table S9
Table S9. TOP3B eCLIP targets.
Gene Symbol (1106)				TOP3B eCLIP targets
NACA2				autism related genes (109)	schizophrenia related genes (59)
TIGD3				ABCA7	NISCH
TIMM23B				AHDC1	ZDHHC5
WASHC2A				ANKRD11	AMBRA1
PWWP2B				AP2S1	ATPAF2
ZNF324B				BIRC6	CHRM4
PKD1				BRD4	DOC2A
KMT2B				BTAF1	EP300
SPHK1				CACNA1H	PRR12
FBXL14				CASZ1	SCAF1
ULK4				CC2D1A	SLC45A1
FAM20C				CCDC88C	SMG6
RAD51				CD276	SREBF1
ALOX5				CDC42BPB	TAOK2
KMT2D				CDK13	FURIN
DYSF				CHD8	MAD1L1
SH3TC1				CIC	PITPNM2
CACNA1H				CLTCL1	ARVCF
PSMB10				DEPDC5	BCL9
VOPP1				DHX30	DGCR2
LAMA5				DIP2A	KALRN
TNRC18				DIP2C	MAN2A2
CELSR3				DLL1	NOTCH2
SEMA6B				DMWD	RAPGEF6
KIF26A				DST	ZDHHC8
EXOSC6				DYNC1H1	ACTR1A
POM121C				DYRK1A	MFHAS1
IMPDH1				DLX2	EDC4
BANF1				EHMT1	ESRP2
SETD1B				EP300	KDM3B
NTSR1				EP400	PSMB10
AHDC1				EIF4G1	PTPRF
ADGRB2				EPPK1	RAI1
COL1A1				FAT1	SLC12A4
AGRN				GRID1	THAP11
REXO1				HCFC1	ATP13A1
ANKRD9				HECTD4	BAP1
HELZ2				HERC2	CLDN23
SRCAP				HIVEP2	DPH2
ZBED3				HIVEP3	FGFR1
ZBTB42				HUWE1	HIP1R
BTN3A2				INTS1	LRP4
WNK2				IQGAP3	MADD
FBXL19				KANSL1	MAP3K11
KCNG1				KAT6A	OVOL1
RYR1				KCNQ2	PDCD11
ZNF276				KDM3B	PPP1R3B
RELB				KDM6B	RPTOR
GLI1				KMT2C	SEMA6C
ABCD1				LRBA	SNX8
CEP170B				LZTR1	SUFU
HERC2				MBD3	SZT2
DLL1				MBD5	ZC3H7B
CTDNEP1				MBD6	FOXO3
CIC				LMX1B	GNA12
SEMA7A				MED13	IQCE
LRRC56				MED13L	UBE3B
RASSF7				MTHFR	RANBP10
DGCR2				MTOR	SGSM2
AKNA				MYO1E	TMCO6
LARS2				MYO9B
CELSR2				NAV2
NUAK1				NCOR1
DOCK6				NINL
ZNF865				NLGN2
LRFN1				NSD1
NBPF1				NUAK1
SLC8B1				OFD1
PLEKHH3				PER1
ZC3H11A				PER2
FOXK1				PITX1
MBD3				PLXNA3
NLRC5				POMGNT1
MEX3D				PREX1
NBEAL2				PRKD2
PLEKHG5				PRKDC
PER1				PRR12
TLNRD1				PHF12
MBD6				RAB43
JAG2				RAI1
SLC7A5				RPS6KA2
OFD1				SBF1
PIEZO1				SCN8A
MMP17				SETD1B
LPAR5				SETD5
PCNX3				SHANK2
ADGRL1				SLC25A39
BAHCC1				SLC38A10
FAM83F				SLC45A1
TMEM8B				SLC6A8
MYCL				SLC7A5
TNK2				SMG6
PCNX2				SND1
SMAD7				SPEN
TMEM216				SRCAP
SLC25A22				SYNJ1
PLCD3				TANC2
LRRC24				TAOK2
SBNO2				TOP3B
ENTPD2				TRAF7
KMT5C				TRAPPC9
FNTB				TRIO
FURIN				TRRAP
UBR4				TSC2
KIAA0100				UBE3C
NEK8				USP7
FRMD8				WDFY3
ANKRD33B				ZC3H11A
PFAS				ZFYVE26
A4GALT				ZNF827
SZT2
EXTL3
RNF43
GAS2L1
MICALL1
PRRT4
IER5L
LTBP4
AGAP3
SLC10A3
FAT1
POMGNT2
BMP4
NOTCH1
ULK1
TP53I13
CACFD1
EMID1
PAX2
GBX2
NOD2
SNX8
IRS1
ZZEF1
EPPK1
C15orf39
TBC1D16
OBSCN
SEPHS2
HECTD4
RABL6
MORN1
NLGN2
ABCA2
PITX1
MARVELD1
SPEG
ABCA7
INTS1
MDN1
ESPL1
WDR90
PPP6R1
DNAJC14
TEP1
OSBPL5
FAM83H
ABL1
HES2
PHC2
RPTOR
B4GALNT4
PDE2A
PLEKHM2
MEGF8
KDM6B
NDST1
PRR12
SBF1
HR
MED13L
FGFRL1
HSPG2
FBRSL1
SPATA20
SH3BP4
RNF223
GRAMD2A
SYNE3
RGS16
CYB5R2
ZNF585A
ZNF316
COBL
HPS6
PLXND1
TMEM127
TFE3
RNPEPL1
SLC38A10
RAPGEF1
PRRC2B
HERC1
GAREM2
LIME1
TSNARE1
TBC1D25
KCNK5
WNT7B
ARHGEF10L
XPO6
CLDN4
MGAT4B
BCR
PEX6
TMEM94
TRAF4
CSNK1G2
KCNJ11
ANKLE1
HIRA
PPP1R16A
FAM189B
MLXIP
NLE1
ARVCF
MGAT1
FRAS1
PHF12
SIL1
PPP1R26
NR2F6
MAP3K11
ZNF687
SNAPC4
SHC1
EPHB4
VAC14
HOXB13
MROH1
ZNF500
GCN1
MYOM3
UNKL
TASP1
GRK5
HDAC7
AATK
GRID1
DOCK3
ARHGEF40
DOT1L
MST1R
FANCA
CASKIN1
TESK1
UBN1
GNA12
BRD2
USP34
HIVEP3
ZCCHC14
MAD1L1
SCARA3
PIP5K1C
PRAG1
NCLN
MCF2L
DMWD
WDR24
ADGRA2
SLC52A2
ARHGAP21
NCOR2
ERBB2
ABTB2
ARHGAP35
KCNQ2
TRIB3
MTOR
PLXNB2
CTDP1
SEMA3F
URB1
ARID1A
ZNF263
PLEC
KLHL21
EP300
TRRAP
SMG5
EHBP1L1
VWA5B2
ARHGAP33
BCL2L11
TPST2
TIMM22
HOXB4
RIPOR1
SETD1A
PNPLA6
HTT
DGKQ
CHPF
CHMP6
SPHK2
CRYBG2
ARAP3
FAM110A
NINL
LMAN2L
TTLL4
ZNF236
SEC16A
SLC16A5
KMT2C
LRP5
SCAP
PLXNA1
FASN
KIFC3
SREBF1
D2HGDH
FAM193B
ACACA
MRPS12
FBRS
CNPPD1
EFNA2
CDC14B
TTC5
LTBP3
SIPA1L3
WDFY3
SGSM2
CEBPB
TOR4A
JMJD7-PLA2G4B
ADAMTSL5
GDPD5
RADIL
TMEM129
PIK3C2B
POLG
TYK2
EP400
TBC1D17
EPOP
ZNRF3
RAI1
PITPNM2
LRRC14
CD2BP2
STX4
LSM10
GTSE1
RPSA
IRF5
ANKRD16
CELSR1
NSD2
SLC25A39
TRAPPC9
NF2
REPIN1
SPEN
AOC2
EML3
HUWE1
BCL7A
ITPR3
C2CD3
SHROOM3
IQGAP3
TMC6
FOSL2
ATP2A3
CANT1
MTHFD1L
MTHFR
MXD4
TNKS1BP1
MROH6
TRMT1
TLN2
TTYH3
PIM3
INF2
DUSP5
ITGA3
BAP1
KIFC2
MICAL3
CHD8
TEAD2
PRH1
ENDOG
XXYLT1
MSRB1
MFHAS1
ZNF341
NPC1
OVOL1
PLEKHO2
CTDSP2
CLCN7
SYNE4
PGAP3
FOXK2
SUMF1
SETD5
RGMA
POLRMT
ARRDC2
KIAA0513
AKT2
NDUFA1
CLDN3
CHCHD5
MRPL46
LRP4
ZNF296
SYNJ1
RAB43
TRIO
FLNA
ZNF628
RARG
NDOR1
BICRA
TRPM4
ENGASE
STK11IP
THAP11
CNTROB
FOXO3
ATG2A
MYORG
PLEKHM1
EDC4
SEMA6C
ZNF579
DPH3P1
KLHL25
LAMC3
ARAP1
BAHD1
MARK4
AGPAT2
SLC45A3
LRRK1
PKN1
NADSYN1
MAST2
EHMT1
RTTN
NPRL3
CDC42BPB
GPAT4
DACT1
MLLT6
ZFYVE26
MYO7A
LAMB2
MAPKBP1
CARD10
PRKD2
DIP2C
SH2B2
PI4KA
ADCY9
STK32C
FAAP100
LONRF1
DDX56
JUND
PLA2G6
BAMBI
EPS15L1
MVB12B
THADA
MYO9B
MYCBP2
ITGA5
UBE3B
ANKS6
KIAA1522
TLN1
ATP13A2
SDSL
CABLES1
MARVELD3
GRK6
PLXNA3
GNAZ
IRAK1
PROM2
DIP2A
FGFR1
BIRC6
CCDC3
TIAM2
SLC7A1
TRAF7
ESYT1
TBCD
EML2
GRTP1
KAZALD1
ZNRF1
MFSD12
BRAT1
PALM
PLA2G4B
MED12
ABR
POLE
IFRD2
TMEM203
HES6
ZNF503
DHX34
ZNF48
POMGNT1
NISCH
RHOF
TRIB1
IDUA
RBM19
DIRAS1
RBM38
PANX1
FBXL12
PTCH1
LPIN3
IGF1R
SIAH2
KCNH2
LTK
SDHA
SCN5A
CTC1
ERCC2
CUL9
TMEM132A
CREB3
PKN3
TBC1D9B
SLC12A4
SUGP2
CLN3
RHOT2
RTL6
TMEM120B
RHBDF2
PAXIP1
IL17RE
PDCD11
INTS5
LRP3
RANBP10
EIF4G1
HMGXB3
POLR2A
MAFF
RASAL1
CYREN
L1CAM
LLGL2
TWNK
TBC1D24
NSD1
CD276
JUN
MAPK8IP3
SLC1A5
ARHGEF4
HCFC1
KANSL3
RRP12
LRBA
SRXN1
KLF10
DAB2IP
SCAF1
DUS1L
MLLT1
ZXDC
TMEM158
PDE4A
SLC37A3
SAC3D1
SLC6A8
CRAMP1
USP40
TRMT11
MPP3
ARC
CYB561D2
ACOX3
ZNF839
TRIM7
DISP2
TFEB
LAT2
ZNF408
TEX19
RALGPS1
CPVL
TRIM28
TNFAIP3
STRN4
INPPL1
PALD1
MADD
PCNT
CC2D1A
POFUT1
EIF6
ATG9A
MYRF
RALGAPA2
MCM3AP
IGF2R
NUP214
PPRC1
CSPG4
LATS2
INO80
TSC2
RHBDF1
CCDC71L
TRAK1
TNFRSF21
SH3PXD2B
GBA2
DYNC1H1
PKMYT1
MUS81
KCNH3
ZNF395
MFSD5
GTPBP6
MMP14
MAP1S
ADAMTS7
BCAM
PLK3
RPAP1
KIAA2013
CDK5R1
MTA2
C19orf54
CPSF1
C19orf47
DNMBP
NBL1
ARHGEF19
TOP3B
NAPRT
MPRIP
FLNC
FAM160A2
FUT1
ANKRD11
SMG6
FZD7
KCTD12
WDR59
MYO10
CBLC
PDIA5
PER2
BRD4
SYMPK
PLCG1
ZMIZ2
MAN2B1
ZER1
ARHGAP44
ZNF335
UNC13B
NAV2
NICN1
IL17RD
ITGB4
CYTH1
TMEM259
ECE1
PHLDB3
CFAP43
ARHGEF11
RIN3
ZNF827
GTF2IRD1
INTS11
IGSF3
TTC3
CHST15
RGL2
SLCO4A1
PPARA
SH3BP5L
SLC35B3
CYTH4
SOWAHB
HEG1
DST
SHISA5
DOCK9
MTMR14
PCNX1
SLC45A1
MEGF6
EPN3
PTPRS
CPTP
KTI12
SAP30
REV3L
CCDC142
CABIN1
GATA2
CDR2L
CASZ1
ZFPM1
APBB3
NOTCH2
PXN
TNRC6C
NHSL1
GGA1
VPS39
ELP6
SIPA1L2
CCDC34
RASD2
CLDN23
ZNF592
ANXA11
DYRK1A
MAPKAPK5
SBF2
NADK
FLCN
ELL
TPCN1
DVL1
SOX4
CHURC1-FNTB
TUBG1
GRB10
CCDC88C
ZBTB4
SPPL2B
MCM5
SSU72
UBL4A
CAMSAP1
CYTH3
KHNYN
FZR1
SYNRG
HAS3
DPH2
NR2F2
MLLT10
NUP188
SPIRE2
DENND5A
MYOF
CBX2
AKAP13
MRPL21
TKFC
ALKBH4
LYST
TAOK2
ANKRD34A
SH2B3
LMTK2
CHD5
KLHL36
SEMA4B
ANKRD13D
PSME4
STEAP3
WIZ
OGDHL
TANC2
ANO8
SFI1
ITPRIPL2
SH3RF1
KCTD15
PRKDC
CDK9
RAP1GAP2
CNPY3-GNMT
TXNRD2
PRDM16
ARSJ
RAP2B
SNX11
SEMA4F
C19orf44
C6orf132
RASA3
BCL9
GAREM1
PIGW
ST3GAL1
PCSK5
KANSL1
WRAP53
MBD5
SPRED2
CLDN7
ITGB5
TOP3A
MAPKAPK2
PTPRF
IL4R
ST14
C2CD2L
WNK1
ATP13A1
GGA3
ZC3H7B
KAT6A
KAT2A
FAM89A
METTL27
KANK3
DEPDC5
COX6A1
EXOSC8
SOCS3
MRPL55
WDR70
THAP8
UVRAG
ZDHHC8
MTMR8
KALRN
ARHGEF2
SSBP4
ABCC10
TANC1
GRIN2D
LRWD1
TTC38
IRS2
RRS1
PHLDB1
GPC2
PIGG
ACTR1A
SND1
KLF4
LZTR1
UCKL1
DENND1A
MAML1
TRNP1
CTSZ
KIAA0930
ORC1
NRF1
PARVB
NFKB2
TJP3
CEP131
BCAS3
APEH
MAEA
PYGB
CCNE1
PRKRIP1
GBF1
ARHGAP17
SHANK2
RIC1
ZNF384
MDFI
DOK4
NFX1
C3orf18
C8orf58
NUBPL
PUF60
ANKHD1
ANKHD1-EIF4EBP3
AP1G2
MYBL2
HEYL
NPHP4
COL4A5
FBXO46
AGTRAP
CCND3
CDK13
PIAS4
GEMIN5
LAD1
DOC2A
ARID3A
EIF2B3
NCOA6
SENP2
TPRA1
DHX30
LMX1B
NCOR1
JUNB
SPG7
NSD3
BTBD7
KIAA0319L
HEXA
ADCY7
DTX2
DLX2
STK40
LDLR
TNFAIP2
KDM3B
MFN2
FOCAD
DCTN1
RIC8A
GADD45B
ORAI1
BABAM2
TMCC2
SLC35E2B
PPA2
NAGLU
AP2A1
RPS6KA2
HIP1R
TBC1D9
NAV1
LRRC8E
WWP1
IQCE
SSH1
SLC2A4RG
NUP85
UBE4B
RAD9A
SDF4
AP3D1
CENPV
POLL
INPP5E
MAN2A2
LAMB3
MON2
HAUS4
CIT
FZD1
ZNF398
BANP
CDPF1
HDDC3
AP4S1
TMEM187
ANKRD37
PPP2R3C
TULP4
SPRY2
ZNF614
GADD45A
AHNAK2
PIK3CD
PDZD8
CHSY1
PREX1
SLC29A2
CFL1
ZDHHC7
SUFU
MED14
PUM1
STK10
SYVN1
FYCO1
SURF6
ZNF516
TMEM268
STK36
CEP192
HIVEP2
PCNX4
JOSD1
ADAT1
PC
LMNB2
TNPO3
SPATA13
PPP1R15B
AMBRA1
USP7
TMCO6
ATPAF2
NLRX1
KBTBD11
KSR2
LHPP
ARHGAP26
PPP2CB
MTG2
ZDHHC5
SORBS3
COQ4
DIAPH2
JAK3
MYO1E
BTAF1
ATMIN
FRYL
SLC2A1
HIP1
FGFR2
FEM1A
PLOD3
TLK1
PNPLA2
DUSP16
FANCI
SPIRE1
UBE3C
NCK2
ZNF426
VAMP8
SLC52A3
SPOUT1
SRGAP2
COMTD1
SNX30
C1orf50
MAP3K5
AHNAK
ADIRF
TBKBP1
UNC119
ITPR2
CDC42BPA
CORO1B
PICK1
PIKFYVE
REPS1
ALKBH6
SARS2
DEF6
IFNLR1
MXRA7
TXNRD3
TAGLN
CSAD
ZFP36L2
PAPLN
BCL2L13
ZGPAT
PPP1R3B
ZBED4
NCAPD2
SLC35A2
GET4
BMP8B
RNF40
GGT7
HECTD1
FLII
EIF4ENIF1
NFATC1
PCYT2
C2CD2
VWA8
ESRP2
ELAC2
TRAPPC12
RDH10
SIRT2
ULK2
RAB11FIP3
NOB1
IPP
MSX2
ATG10
PLEKHG1
JAK2
CHRM4
SNX15
CDK12
TINAGL1
CLTCL1
SMURF2
ICE1
AP2S1
ARFGEF2
RAPGEF6
EVI5L
CLASP2
KLHL17
MIB2
SCARB1
MED13
ARSG
RHPN1
MTMR3
SCN8A
ABCC3
AKT1
JADE1

## Sheet: Table S10
Table S10. TOP3B eCLIP targets with altered expression in TOP3B-KO.
TOP3B eCLIP targets		TOP3B eCLIP targets
RNA down in TOP3B-KO (130)	RNA up in TOP3B-KO (5)	RPF down in TOP3B-KO (37)	RPF up in TOP3B-KO (34)			TOP3B topoisomerase activity dependent
HAS3	ABR	ZNF426	CHPF			TOP3B topoisomerase activity independent
KLF4	GNAZ	KLF4	PI4KA
KCTD12	PPA2	HAS3	CNPPD1
RGS16	ADGRA2	JUNB	TNRC18
ARHGAP26	LHPP	CHD8	NCAPD2
SLC45A1		ARHGAP26	TTC38
RASD2		COL4A5	TNFRSF21
FLNC		SYNJ1	NTSR1
PDE2A		NADK	APBB3
ST3GAL1		PDE2A	TMEM132A
PEX6		FGFR1	FAT1
SLCO4A1		RNF223	PCNX2
TMEM158		WNK2	ADGRA2
PFAS		DLX2	GBA2
BAMBI		SMAD7	FBXL19
NR2F2		SLC45A1	C3orf18
AOC2		MSX2	SEMA6B
PPP1R26		PER2	NUAK1
NADK		NAV2	BCAM
RAP1GAP2		PER1	ZNF341
ABCA7		AGRN	KMT5C
SEPHS2		SBF1	EHBP1L1
ESRP2		PRR12	LTBP4
CTC1		STK10	MEGF8
MAN2B1		NR2F2	AKT2
MYBL2		ZNF296	MTHFR
NBPF1		SLC52A3	TRAPPC12
MSX2		AP4S1	PLA2G6
MDFI		GATA2	LHPP
INF2		WNK1	LAMA5
PER2		PLK3	L1CAM
SSBP4		TPST2	EMID1
MAFF		LYST	CELSR3
SOWAHB		RASD2	PAX2
WNK2		PFAS
PER1		KIAA0100
TRPM4		NOD2
NLE1
ZNF296
SBF1
LIME1
DLX2
ZNF500
A4GALT
RADIL
TFEB
MBD6
OVOL1
LDLR
EXOSC6
CLCN7
FAM83F
DOT1L
AKNA
C19orf47
PLXNA1
TMCC2
ZNF408
KIAA0100
IRS1
AGRN
SMAD7
ZNF263
ELL
COL1A1
FLCN
MARVELD3
MLLT6
KIFC2
INPP5E
SIPA1L3
WDR24
KCNK5
CCDC88C
SYMPK
GAS2L1
REXO1
UCKL1
NPRL3
STK10
EIF4G1
EDC4
PRR12
UBN1
ALKBH4
RPAP1
CASZ1
TXNRD2
CTDP1
HMGXB3
ATG2A
IL4R
MFN2
DAB2IP
MLXIP
C15orf39
IRF5
WDR59
PRKD2
SNX8
MAML1
FEM1A
SETD1B
NDOR1
JOSD1
HIRA
SNAPC4
TYK2
GGA3
NEK8
RAB43
RBM19
FAM193B
CLN3
SCARB1
GCN1
NUP188
PLEKHM2
CASKIN1
GBX2
BCR
TBKBP1
MAP1S
SH3BP5L
GATA2
MCM3AP
ZNF324B
ULK1
FLII
AP3D1

[truncated: 1 more sheets: Table S11]
